# Supplementary material for: A fully integrated sample preparation strategy for highly sensitive intact glycoproteomics
Source: Royal Society of Chemistry journal article supplement (doi:10.1039/d1an02166d), 2022-01-01
Supplement: d1an02166d2.xlsx [file d1an02166d2.xlsx]

## Sheet: Table S1
Table S1-1. Intact glycopeptides identified from 1 mg IgG with Intact GlycoSISPROT under three replicates.						Table S1-2. Intact glycopeptides identified from 10 mg IgG with Intact GlycoSISPROT under three replicates.
No	Proteins	ProSites	Peptide sequence sequence	Glycan composition (Glycan(H,N,A,G,F)		No	Proteins	ProSites	Peptide sequence sequence	Glycan composition (Glycan(H,N,A,G,F)
1	sp|P01857|IGHG1_HUMAN	180	EEQYJSTYR	0 2 0 0 1		1	sp|P01857|IGHG1_HUMAN	180	EEQYJSTYR	0 1 0 0 1
2	sp|P01857|IGHG1_HUMAN	180	EEQYJSTYR	2 3 0 0 1		2	sp|P01857|IGHG1_HUMAN	180	EEQYJSTYR	0 2 0 0 1
3	sp|P01857|IGHG1_HUMAN	180	EEQYJSTYR	2 5 0 0 3		3	sp|P01857|IGHG1_HUMAN	180	EEQYJSTYR	2 3 0 0 0
4	sp|P01857|IGHG1_HUMAN	180	EEQYJSTYR	3 3 0 0 0		4	sp|P01857|IGHG1_HUMAN	180	EEQYJSTYR	2 3 0 0 1
5	sp|P01857|IGHG1_HUMAN	180	EEQYJSTYR	3 3 0 0 1		5	sp|P01857|IGHG1_HUMAN	180	EEQYJSTYR	3 3 0 0 0
6	sp|P01857|IGHG1_HUMAN	180	EEQYJSTYR	3 4 0 0 0		6	sp|P01857|IGHG1_HUMAN	180	EEQYJSTYR	3 3 0 0 1
7	sp|P01857|IGHG1_HUMAN	180	EEQYJSTYR	3 4 0 0 1		7	sp|P01857|IGHG1_HUMAN	180	EEQYJSTYR	3 4 0 0 0
8	sp|P01857|IGHG1_HUMAN	180	EEQYJSTYR	3 5 0 0 0		8	sp|P01857|IGHG1_HUMAN	180	EEQYJSTYR	3 4 0 0 1
9	sp|P01857|IGHG1_HUMAN	180	EEQYJSTYR	3 5 0 0 1		9	sp|P01857|IGHG1_HUMAN	180	EEQYJSTYR	3 5 0 0 0
10	sp|P01857|IGHG1_HUMAN	180	EEQYJSTYR	4 3 0 0 1		10	sp|P01857|IGHG1_HUMAN	180	EEQYJSTYR	3 5 0 0 1
11	sp|P01857|IGHG1_HUMAN	180	EEQYJSTYR	4 3 1 0 1		11	sp|P01857|IGHG1_HUMAN	180	EEQYJSTYR	4 3 0 0 0
12	sp|P01857|IGHG1_HUMAN	180	EEQYJSTYR	4 4 0 0 0		12	sp|P01857|IGHG1_HUMAN	180	EEQYJSTYR	4 3 0 0 1
13	sp|P01857|IGHG1_HUMAN	180	EEQYJSTYR	4 4 0 0 1		13	sp|P01857|IGHG1_HUMAN	180	EEQYJSTYR	4 3 1 0 1
14	sp|P01857|IGHG1_HUMAN	180	EEQYJSTYR	4 4 1 0 1		14	sp|P01857|IGHG1_HUMAN	180	EEQYJSTYR	4 4 0 0 0
15	sp|P01857|IGHG1_HUMAN	180	EEQYJSTYR	4 5 0 0 0		15	sp|P01857|IGHG1_HUMAN	180	EEQYJSTYR	4 4 0 0 1
16	sp|P01857|IGHG1_HUMAN	180	EEQYJSTYR	4 5 0 0 1		16	sp|P01857|IGHG1_HUMAN	180	EEQYJSTYR	4 4 0 0 2
17	sp|P01857|IGHG1_HUMAN	180	EEQYJSTYR	4 5 1 0 1		17	sp|P01857|IGHG1_HUMAN	180	EEQYJSTYR	4 4 1 0 0
18	sp|P01857|IGHG1_HUMAN	180	EEQYJSTYR	5 4 0 0 0		18	sp|P01857|IGHG1_HUMAN	180	EEQYJSTYR	4 4 1 0 1
19	sp|P01857|IGHG1_HUMAN	180	EEQYJSTYR	5 4 0 0 1		19	sp|P01857|IGHG1_HUMAN	180	EEQYJSTYR	4 5 0 0 0
20	sp|P01857|IGHG1_HUMAN	180	EEQYJSTYR	5 4 0 0 2		20	sp|P01857|IGHG1_HUMAN	180	EEQYJSTYR	4 5 0 0 1
21	sp|P01857|IGHG1_HUMAN	180	EEQYJSTYR	5 4 1 0 0		21	sp|P01857|IGHG1_HUMAN	180	EEQYJSTYR	4 5 1 0 1
22	sp|P01857|IGHG1_HUMAN	180	EEQYJSTYR	5 4 1 0 1		22	sp|P01857|IGHG1_HUMAN	180	EEQYJSTYR	5 2 0 0 0
23	sp|P01857|IGHG1_HUMAN	180	EEQYJSTYR	5 4 2 0 1		23	sp|P01857|IGHG1_HUMAN	180	EEQYJSTYR	5 3 0 0 1
24	sp|P01857|IGHG1_HUMAN	180	EEQYJSTYR	5 5 0 0 0		24	sp|P01857|IGHG1_HUMAN	180	EEQYJSTYR	5 3 1 0 1
25	sp|P01857|IGHG1_HUMAN	180	EEQYJSTYR	5 5 0 0 1		25	sp|P01857|IGHG1_HUMAN	180	EEQYJSTYR	5 4 0 0 0
26	sp|P01857|IGHG1_HUMAN	180	EEQYJSTYR	5 5 0 0 2		26	sp|P01857|IGHG1_HUMAN	180	EEQYJSTYR	5 4 0 0 1
27	sp|P01857|IGHG1_HUMAN	180	EEQYJSTYR	6 3 1 0 1		27	sp|P01857|IGHG1_HUMAN	180	EEQYJSTYR	5 4 0 0 2
28	sp|P01857|IGHG1_HUMAN	180	EEQYJSTYR	6 4 0 0 0		28	sp|P01857|IGHG1_HUMAN	180	EEQYJSTYR	5 4 1 0 0
29	sp|P01857|IGHG1_HUMAN	180	EEQYJSTYR	6 4 0 0 1		29	sp|P01857|IGHG1_HUMAN	180	EEQYJSTYR	5 4 1 0 1
30	sp|P01857|IGHG1_HUMAN	180	EEQYJSTYR	6 4 1 0 0		30	sp|P01857|IGHG1_HUMAN	180	EEQYJSTYR	5 4 2 0 1
31	sp|P01857|IGHG1_HUMAN	180	EEQYJSTYR	7 2 0 0 1		31	sp|P01857|IGHG1_HUMAN	180	EEQYJSTYR	5 5 0 0 0
32	sp|P01857|IGHG1_HUMAN	180	EEQYJSTYR	8 2 0 0 1		32	sp|P01857|IGHG1_HUMAN	180	EEQYJSTYR	5 5 0 0 1
33	sp|P01857|IGHG1_HUMAN	180	TKPREEQYJSTYR	3 3 0 0 1		33	sp|P01857|IGHG1_HUMAN	180	EEQYJSTYR	5 5 0 0 2
34	sp|P01857|IGHG1_HUMAN	180	TKPREEQYJSTYR	3 4 0 0 0		34	sp|P01857|IGHG1_HUMAN	180	EEQYJSTYR	5 5 1 0 0
35	sp|P01857|IGHG1_HUMAN	180	TKPREEQYJSTYR	3 4 0 0 1		35	sp|P01857|IGHG1_HUMAN	180	EEQYJSTYR	5 5 1 0 1
36	sp|P01857|IGHG1_HUMAN	180	TKPREEQYJSTYR	3 5 0 0 0		36	sp|P01857|IGHG1_HUMAN	180	EEQYJSTYR	6 4 0 0 1
37	sp|P01857|IGHG1_HUMAN	180	TKPREEQYJSTYR	3 5 0 0 1		37	sp|P01857|IGHG1_HUMAN	180	EEQYJSTYR	6 4 1 0 1
38	sp|P01857|IGHG1_HUMAN	180	TKPREEQYJSTYR	4 3 0 0 1		38	sp|P01857|IGHG1_HUMAN	180	EEQYJSTYR	7 2 0 0 1
39	sp|P01857|IGHG1_HUMAN	180	TKPREEQYJSTYR	4 4 0 0 0		39	sp|P01857|IGHG1_HUMAN	180	EEQYJSTYR	8 2 0 0 1
40	sp|P01857|IGHG1_HUMAN	180	TKPREEQYJSTYR	4 4 0 0 1		40	sp|P01857|IGHG1_HUMAN	180	EEQYJSTYRVVSVLTVLHQDWLNGK	3 4 0 0 1
41	sp|P01857|IGHG1_HUMAN	180	TKPREEQYJSTYR	4 4 0 0 2		41	sp|P01857|IGHG1_HUMAN	180	EEQYJSTYRVVSVLTVLHQDWLNGK	4 4 0 0 1
42	sp|P01857|IGHG1_HUMAN	180	TKPREEQYJSTYR	4 4 1 0 0		42	sp|P01857|IGHG1_HUMAN	180	EEQYJSTYRVVSVLTVLHQDWLNGK	4 4 2 0 0
43	sp|P01857|IGHG1_HUMAN	180	TKPREEQYJSTYR	4 4 1 0 1		43	sp|P01857|IGHG1_HUMAN	180	EEQYJSTYRVVSVLTVLHQDWLNGK	5 4 0 0 1
44	sp|P01857|IGHG1_HUMAN	180	TKPREEQYJSTYR	4 5 0 0 0		44	sp|P01857|IGHG1_HUMAN	180	EEQYJSTYRVVSVLTVLHQDWLNGKEYK	3 4 0 0 1
45	sp|P01857|IGHG1_HUMAN	180	TKPREEQYJSTYR	4 5 0 0 1		45	sp|P01857|IGHG1_HUMAN	180	EEQYJSTYRVVSVLTVLHQDWLNGKEYK	4 4 0 0 1
46	sp|P01857|IGHG1_HUMAN	180	TKPREEQYJSTYR	4 5 0 0 2		46	sp|P01857|IGHG1_HUMAN	180	EEQYJSTYRVVSVLTVLHQDWLNGKEYK	4 5 0 0 1
47	sp|P01857|IGHG1_HUMAN	180	TKPREEQYJSTYR	4 5 1 0 1		47	sp|P01857|IGHG1_HUMAN	180	EEQYJSTYRVVSVLTVLHQDWLNGKEYK	5 4 0 0 1
48	sp|P01857|IGHG1_HUMAN	180	TKPREEQYJSTYR	5 3 1 0 0		48	sp|P01857|IGHG1_HUMAN	180	EEQYJSTYRVVSVLTVLHQDWLNGKEYK	5 4 1 0 1
49	sp|P01857|IGHG1_HUMAN	180	TKPREEQYJSTYR	5 4 0 0 0		49	sp|P01857|IGHG1_HUMAN	180	TKPREEQYJSTYR	0 1 0 0 1
50	sp|P01857|IGHG1_HUMAN	180	TKPREEQYJSTYR	5 4 0 0 1		50	sp|P01857|IGHG1_HUMAN	180	TKPREEQYJSTYR	0 2 0 0 1
51	sp|P01857|IGHG1_HUMAN	180	TKPREEQYJSTYR	5 4 0 0 2		51	sp|P01857|IGHG1_HUMAN	180	TKPREEQYJSTYR	2 3 0 0 1
52	sp|P01857|IGHG1_HUMAN	180	TKPREEQYJSTYR	5 4 1 0 0		52	sp|P01857|IGHG1_HUMAN	180	TKPREEQYJSTYR	3 3 0 0 0
53	sp|P01857|IGHG1_HUMAN	180	TKPREEQYJSTYR	5 4 1 0 1		53	sp|P01857|IGHG1_HUMAN	180	TKPREEQYJSTYR	3 3 0 0 1
54	sp|P01857|IGHG1_HUMAN	180	TKPREEQYJSTYR	5 4 1 0 2		54	sp|P01857|IGHG1_HUMAN	180	TKPREEQYJSTYR	3 4 0 0 0
55	sp|P01857|IGHG1_HUMAN	180	TKPREEQYJSTYR	5 4 2 0 1		55	sp|P01857|IGHG1_HUMAN	180	TKPREEQYJSTYR	3 4 0 0 1
56	sp|P01857|IGHG1_HUMAN	180	TKPREEQYJSTYR	5 5 0 0 0		56	sp|P01857|IGHG1_HUMAN	180	TKPREEQYJSTYR	3 5 0 0 0
57	sp|P01857|IGHG1_HUMAN	180	TKPREEQYJSTYR	5 5 0 0 1		57	sp|P01857|IGHG1_HUMAN	180	TKPREEQYJSTYR	3 5 0 0 1
58	sp|P01857|IGHG1_HUMAN	180	TKPREEQYJSTYR	5 5 1 0 0		58	sp|P01857|IGHG1_HUMAN	180	TKPREEQYJSTYR	3 6 0 0 0
59	sp|P01857|IGHG1_HUMAN	180	TKPREEQYJSTYR	5 5 1 0 1		59	sp|P01857|IGHG1_HUMAN	180	TKPREEQYJSTYR	4 3 0 0 1
60	sp|P01857|IGHG1_HUMAN	180	TKPREEQYJSTYR	6 3 0 0 3		60	sp|P01857|IGHG1_HUMAN	180	TKPREEQYJSTYR	4 3 1 0 0
61	sp|P01857|IGHG1_HUMAN	180	TKPREEQYJSTYR	6 3 1 0 1		61	sp|P01857|IGHG1_HUMAN	180	TKPREEQYJSTYR	4 3 1 0 1
62	sp|P01857|IGHG1_HUMAN	180	TKPREEQYJSTYR	6 4 0 0 0		62	sp|P01857|IGHG1_HUMAN	180	TKPREEQYJSTYR	4 4 0 0 0
63	sp|P01857|IGHG1_HUMAN	180	TKPREEQYJSTYR	6 4 0 0 1		63	sp|P01857|IGHG1_HUMAN	180	TKPREEQYJSTYR	4 4 0 0 1
64	sp|P01857|IGHG1_HUMAN	180	TKPREEQYJSTYR	6 4 1 0 1		64	sp|P01857|IGHG1_HUMAN	180	TKPREEQYJSTYR	4 4 0 0 2
65	sp|P01857|IGHG1_HUMAN	180	TKPREEQYJSTYR	6 4 2 0 2		65	sp|P01857|IGHG1_HUMAN	180	TKPREEQYJSTYR	4 4 1 0 0
66	sp|P01857|IGHG1_HUMAN	180	TKPREEQYJSTYR	7 2 0 0 1		66	sp|P01857|IGHG1_HUMAN	180	TKPREEQYJSTYR	4 4 1 0 1
67	sp|P01857|IGHG1_HUMAN	180	TKPREEQYJSTYR	8 2 0 0 1		67	sp|P01857|IGHG1_HUMAN	180	TKPREEQYJSTYR	4 5 0 0 0
68	sp|P01859|IGHG2_HUMAN	176	EEQFJSTFR	0 1 0 0 1		68	sp|P01857|IGHG1_HUMAN	180	TKPREEQYJSTYR	4 5 0 0 1
69	sp|P01859|IGHG2_HUMAN	176	EEQFJSTFR	0 2 0 0 1		69	sp|P01857|IGHG1_HUMAN	180	TKPREEQYJSTYR	4 5 1 0 0
70	sp|P01859|IGHG2_HUMAN	176	EEQFJSTFR	2 3 0 0 1		70	sp|P01857|IGHG1_HUMAN	180	TKPREEQYJSTYR	4 5 1 0 1
71	sp|P01859|IGHG2_HUMAN	176	EEQFJSTFR	2 5 0 0 3		71	sp|P01857|IGHG1_HUMAN	180	TKPREEQYJSTYR	5 3 1 0 1
72	sp|P01859|IGHG2_HUMAN	176	EEQFJSTFR	3 3 0 0 1		72	sp|P01857|IGHG1_HUMAN	180	TKPREEQYJSTYR	5 3 2 0 0
73	sp|P01859|IGHG2_HUMAN	176	EEQFJSTFR	3 4 0 0 0		73	sp|P01857|IGHG1_HUMAN	180	TKPREEQYJSTYR	5 3 2 0 1
74	sp|P01859|IGHG2_HUMAN	176	EEQFJSTFR	3 4 0 0 1		74	sp|P01857|IGHG1_HUMAN	180	TKPREEQYJSTYR	5 4 0 0 0
75	sp|P01859|IGHG2_HUMAN	176	EEQFJSTFR	3 4 1 0 1		75	sp|P01857|IGHG1_HUMAN	180	TKPREEQYJSTYR	5 4 0 0 1
76	sp|P01859|IGHG2_HUMAN	176	EEQFJSTFR	3 5 0 0 0		76	sp|P01857|IGHG1_HUMAN	180	TKPREEQYJSTYR	5 4 0 0 2
77	sp|P01859|IGHG2_HUMAN	176	EEQFJSTFR	3 5 0 0 1		77	sp|P01857|IGHG1_HUMAN	180	TKPREEQYJSTYR	5 4 1 0 0
78	sp|P01859|IGHG2_HUMAN	176	EEQFJSTFR	3 6 0 0 0		78	sp|P01857|IGHG1_HUMAN	180	TKPREEQYJSTYR	5 4 1 0 1
79	sp|P01859|IGHG2_HUMAN	176	EEQFJSTFR	4 3 0 0 1		79	sp|P01857|IGHG1_HUMAN	180	TKPREEQYJSTYR	5 4 1 0 2
80	sp|P01859|IGHG2_HUMAN	176	EEQFJSTFR	4 3 1 0 1		80	sp|P01857|IGHG1_HUMAN	180	TKPREEQYJSTYR	5 4 2 0 0
81	sp|P01859|IGHG2_HUMAN	176	EEQFJSTFR	4 4 0 0 0		81	sp|P01857|IGHG1_HUMAN	180	TKPREEQYJSTYR	5 4 2 0 1
82	sp|P01859|IGHG2_HUMAN	176	EEQFJSTFR	4 4 0 0 1		82	sp|P01857|IGHG1_HUMAN	180	TKPREEQYJSTYR	5 5 0 0 0
83	sp|P01859|IGHG2_HUMAN	176	EEQFJSTFR	4 4 1 0 1		83	sp|P01857|IGHG1_HUMAN	180	TKPREEQYJSTYR	5 5 0 0 1
84	sp|P01859|IGHG2_HUMAN	176	EEQFJSTFR	4 5 0 0 0		84	sp|P01857|IGHG1_HUMAN	180	TKPREEQYJSTYR	5 5 1 0 0
85	sp|P01859|IGHG2_HUMAN	176	EEQFJSTFR	4 5 0 0 1		85	sp|P01857|IGHG1_HUMAN	180	TKPREEQYJSTYR	5 5 1 0 1
86	sp|P01859|IGHG2_HUMAN	176	EEQFJSTFR	4 5 0 0 2		86	sp|P01857|IGHG1_HUMAN	180	TKPREEQYJSTYR	6 2 0 0 1
87	sp|P01859|IGHG2_HUMAN	176	EEQFJSTFR	4 7 0 0 0		87	sp|P01857|IGHG1_HUMAN	180	TKPREEQYJSTYR	6 3 1 0 1
88	sp|P01859|IGHG2_HUMAN	176	EEQFJSTFR	5 2 0 0 0		88	sp|P01857|IGHG1_HUMAN	180	TKPREEQYJSTYR	6 4 0 0 0
89	sp|P01859|IGHG2_HUMAN	176	EEQFJSTFR	5 3 1 0 1		89	sp|P01857|IGHG1_HUMAN	180	TKPREEQYJSTYR	6 4 0 0 1
90	sp|P01859|IGHG2_HUMAN	176	EEQFJSTFR	5 4 0 0 0		90	sp|P01857|IGHG1_HUMAN	180	TKPREEQYJSTYR	6 4 1 0 1
91	sp|P01859|IGHG2_HUMAN	176	EEQFJSTFR	5 4 0 0 1		91	sp|P01857|IGHG1_HUMAN	180	TKPREEQYJSTYR	6 4 2 0 0
92	sp|P01859|IGHG2_HUMAN	176	EEQFJSTFR	5 4 0 0 2		92	sp|P01857|IGHG1_HUMAN	180	TKPREEQYJSTYR	6 4 2 0 2
93	sp|P01859|IGHG2_HUMAN	176	EEQFJSTFR	5 4 1 0 0		93	sp|P01857|IGHG1_HUMAN	180	TKPREEQYJSTYR	7 2 0 0 1
94	sp|P01859|IGHG2_HUMAN	176	EEQFJSTFR	5 4 1 0 1		94	sp|P01859|IGHG2_HUMAN	176	EEQFJSTFR	0 2 0 0 1
95	sp|P01859|IGHG2_HUMAN	176	EEQFJSTFR	5 5 0 0 0		95	sp|P01859|IGHG2_HUMAN	176	EEQFJSTFR	2 3 0 0 1
96	sp|P01859|IGHG2_HUMAN	176	EEQFJSTFR	5 5 0 0 1		96	sp|P01859|IGHG2_HUMAN	176	EEQFJSTFR	3 3 0 0 0
97	sp|P01859|IGHG2_HUMAN	176	EEQFJSTFR	5 5 1 0 1		97	sp|P01859|IGHG2_HUMAN	176	EEQFJSTFR	3 3 0 0 1
98	sp|P01859|IGHG2_HUMAN	176	EEQFJSTFR	6 2 0 0 0		98	sp|P01859|IGHG2_HUMAN	176	EEQFJSTFR	3 3 1 0 1
99	sp|P01859|IGHG2_HUMAN	176	EEQFJSTFR	6 2 0 0 1		99	sp|P01859|IGHG2_HUMAN	176	EEQFJSTFR	3 4 0 0 0
100	sp|P01859|IGHG2_HUMAN	176	EEQFJSTFR	6 3 0 0 2		100	sp|P01859|IGHG2_HUMAN	176	EEQFJSTFR	3 4 0 0 1
101	sp|P01859|IGHG2_HUMAN	176	EEQFJSTFR	6 3 1 0 1		101	sp|P01859|IGHG2_HUMAN	176	EEQFJSTFR	3 4 1 0 1
102	sp|P01859|IGHG2_HUMAN	176	EEQFJSTFR	6 3 1 0 2		102	sp|P01859|IGHG2_HUMAN	176	EEQFJSTFR	3 4 1 0 3
103	sp|P01859|IGHG2_HUMAN	176	EEQFJSTFR	6 4 0 0 0		103	sp|P01859|IGHG2_HUMAN	176	EEQFJSTFR	3 5 0 0 0
104	sp|P01859|IGHG2_HUMAN	176	EEQFJSTFR	6 4 0 0 1		104	sp|P01859|IGHG2_HUMAN	176	EEQFJSTFR	3 5 0 0 1
105	sp|P01859|IGHG2_HUMAN	176	EEQFJSTFR	6 4 1 0 0		105	sp|P01859|IGHG2_HUMAN	176	EEQFJSTFR	4 3 0 0 1
106	sp|P01859|IGHG2_HUMAN	176	EEQFJSTFR	7 2 0 0 1		106	sp|P01859|IGHG2_HUMAN	176	EEQFJSTFR	4 3 1 0 1
107	sp|P01859|IGHG2_HUMAN	176	TKPREEQFJSTFR	0 1 0 0 1		107	sp|P01859|IGHG2_HUMAN	176	EEQFJSTFR	4 4 0 0 0
108	sp|P01859|IGHG2_HUMAN	176	TKPREEQFJSTFR	0 2 0 0 1		108	sp|P01859|IGHG2_HUMAN	176	EEQFJSTFR	4 4 0 0 1
109	sp|P01859|IGHG2_HUMAN	176	TKPREEQFJSTFR	3 3 0 0 1		109	sp|P01859|IGHG2_HUMAN	176	EEQFJSTFR	4 4 1 0 0
110	sp|P01859|IGHG2_HUMAN	176	TKPREEQFJSTFR	3 4 0 0 0		110	sp|P01859|IGHG2_HUMAN	176	EEQFJSTFR	4 4 1 0 1
111	sp|P01859|IGHG2_HUMAN	176	TKPREEQFJSTFR	3 4 0 0 1		111	sp|P01859|IGHG2_HUMAN	176	EEQFJSTFR	4 5 0 0 0
112	sp|P01859|IGHG2_HUMAN	176	TKPREEQFJSTFR	3 5 0 0 0		112	sp|P01859|IGHG2_HUMAN	176	EEQFJSTFR	4 5 0 0 1
113	sp|P01859|IGHG2_HUMAN	176	TKPREEQFJSTFR	3 5 0 0 1		113	sp|P01859|IGHG2_HUMAN	176	EEQFJSTFR	4 5 0 0 2
114	sp|P01859|IGHG2_HUMAN	176	TKPREEQFJSTFR	4 3 1 0 1		114	sp|P01859|IGHG2_HUMAN	176	EEQFJSTFR	4 5 1 0 1
115	sp|P01859|IGHG2_HUMAN	176	TKPREEQFJSTFR	4 4 0 0 0		115	sp|P01859|IGHG2_HUMAN	176	EEQFJSTFR	5 2 0 0 0
116	sp|P01859|IGHG2_HUMAN	176	TKPREEQFJSTFR	4 4 0 0 1		116	sp|P01859|IGHG2_HUMAN	176	EEQFJSTFR	5 3 1 0 1
117	sp|P01859|IGHG2_HUMAN	176	TKPREEQFJSTFR	4 4 0 0 2		117	sp|P01859|IGHG2_HUMAN	176	EEQFJSTFR	5 4 0 0 0
118	sp|P01859|IGHG2_HUMAN	176	TKPREEQFJSTFR	4 4 1 0 0		118	sp|P01859|IGHG2_HUMAN	176	EEQFJSTFR	5 4 0 0 1
119	sp|P01859|IGHG2_HUMAN	176	TKPREEQFJSTFR	4 4 1 0 1		119	sp|P01859|IGHG2_HUMAN	176	EEQFJSTFR	5 4 0 0 2
120	sp|P01859|IGHG2_HUMAN	176	TKPREEQFJSTFR	4 5 0 0 0		120	sp|P01859|IGHG2_HUMAN	176	EEQFJSTFR	5 4 1 0 0
121	sp|P01859|IGHG2_HUMAN	176	TKPREEQFJSTFR	4 5 0 0 1		121	sp|P01859|IGHG2_HUMAN	176	EEQFJSTFR	5 4 1 0 1
122	sp|P01859|IGHG2_HUMAN	176	TKPREEQFJSTFR	5 3 1 0 1		122	sp|P01859|IGHG2_HUMAN	176	EEQFJSTFR	5 4 1 0 2
123	sp|P01859|IGHG2_HUMAN	176	TKPREEQFJSTFR	5 4 0 0 0		123	sp|P01859|IGHG2_HUMAN	176	EEQFJSTFR	5 4 2 0 1
124	sp|P01859|IGHG2_HUMAN	176	TKPREEQFJSTFR	5 4 0 0 1		124	sp|P01859|IGHG2_HUMAN	176	EEQFJSTFR	5 5 0 0 1
125	sp|P01859|IGHG2_HUMAN	176	TKPREEQFJSTFR	5 4 0 0 2		125	sp|P01859|IGHG2_HUMAN	176	EEQFJSTFR	5 5 0 0 2
126	sp|P01859|IGHG2_HUMAN	176	TKPREEQFJSTFR	5 4 1 0 0		126	sp|P01859|IGHG2_HUMAN	176	EEQFJSTFR	5 5 1 0 1
127	sp|P01859|IGHG2_HUMAN	176	TKPREEQFJSTFR	5 4 1 0 1		127	sp|P01859|IGHG2_HUMAN	176	EEQFJSTFR	6 2 0 0 0
128	sp|P01859|IGHG2_HUMAN	176	TKPREEQFJSTFR	5 4 2 0 1		128	sp|P01859|IGHG2_HUMAN	176	EEQFJSTFR	6 2 0 0 1
129	sp|P01859|IGHG2_HUMAN	176	TKPREEQFJSTFR	5 5 0 0 0		129	sp|P01859|IGHG2_HUMAN	176	EEQFJSTFR	6 3 0 0 1
130	sp|P01859|IGHG2_HUMAN	176	TKPREEQFJSTFR	5 5 0 0 1		130	sp|P01859|IGHG2_HUMAN	176	EEQFJSTFR	6 3 0 0 3
131	sp|P01859|IGHG2_HUMAN	176	TKPREEQFJSTFR	5 5 1 0 1		131	sp|P01859|IGHG2_HUMAN	176	EEQFJSTFR	6 3 1 0 0
132	sp|P01859|IGHG2_HUMAN	176	TKPREEQFJSTFR	6 3 1 0 1		132	sp|P01859|IGHG2_HUMAN	176	EEQFJSTFR	6 3 1 0 1
133	sp|P01859|IGHG2_HUMAN	176	TKPREEQFJSTFR	6 4 0 0 1		133	sp|P01859|IGHG2_HUMAN	176	EEQFJSTFR	6 4 0 0 1
134	sp|P01859|IGHG2_HUMAN	176	TKPREEQFJSTFR	6 4 1 0 1		134	sp|P01859|IGHG2_HUMAN	176	EEQFJSTFR	6 4 1 0 1
135	sp|P01859|IGHG2_HUMAN	176	TKPREEQFJSTFR	7 2 0 0 1		135	sp|P01859|IGHG2_HUMAN	176	EEQFJSTFR	6 6 1 0 1
136	sp|P01859|IGHG2_HUMAN	176	TKPREEQFJSTFR	8 2 0 0 1		136	sp|P01859|IGHG2_HUMAN	176	EEQFJSTFR	7 2 0 0 1
137	sp|P01860|IGHG3_HUMAN	227	EEQYJSTFR	3 4 0 0 0		137	sp|P01859|IGHG2_HUMAN	176	EEQFJSTFR	8 2 0 0 1
138	sp|P01860|IGHG3_HUMAN	227	EEQYJSTFR	3 4 0 0 1		138	sp|P01859|IGHG2_HUMAN	176	EEQFJSTFRVVSVLTVVHQDWLNGK	4 4 0 0 1
139	sp|P01860|IGHG3_HUMAN	227	EEQYJSTFR	3 5 0 0 1		139	sp|P01859|IGHG2_HUMAN	176	EEQFJSTFRVVSVLTVVHQDWLNGKEYK	4 4 0 0 1
140	sp|P01860|IGHG3_HUMAN	227	EEQYJSTFR	4 4 0 0 0		140	sp|P01859|IGHG2_HUMAN	176	TKPREEQFJSTFR	2 3 0 0 1
141	sp|P01860|IGHG3_HUMAN	227	EEQYJSTFR	4 4 0 0 1		141	sp|P01859|IGHG2_HUMAN	176	TKPREEQFJSTFR	3 3 0 0 1
142	sp|P01860|IGHG3_HUMAN	227	EEQYJSTFR	4 5 0 0 0		142	sp|P01859|IGHG2_HUMAN	176	TKPREEQFJSTFR	3 4 0 0 0
143	sp|P01860|IGHG3_HUMAN	227	EEQYJSTFR	4 5 0 0 1		143	sp|P01859|IGHG2_HUMAN	176	TKPREEQFJSTFR	3 4 0 0 1
144	sp|P01860|IGHG3_HUMAN	227	EEQYJSTFR	5 4 0 0 0		144	sp|P01859|IGHG2_HUMAN	176	TKPREEQFJSTFR	3 5 0 0 0
145	sp|P01860|IGHG3_HUMAN	227	EEQYJSTFR	5 4 0 0 1		145	sp|P01859|IGHG2_HUMAN	176	TKPREEQFJSTFR	3 5 0 0 1
146	sp|P01860|IGHG3_HUMAN	227	EEQYJSTFR	5 4 1 0 1		146	sp|P01859|IGHG2_HUMAN	176	TKPREEQFJSTFR	3 6 0 0 0
147	sp|P01860|IGHG3_HUMAN	227	EEQYJSTFR	5 5 0 0 0		147	sp|P01859|IGHG2_HUMAN	176	TKPREEQFJSTFR	4 3 0 0 1
148	sp|P01860|IGHG3_HUMAN	227	EEQYJSTFR	5 5 0 0 1		148	sp|P01859|IGHG2_HUMAN	176	TKPREEQFJSTFR	4 3 1 0 1
149	sp|P01860|IGHG3_HUMAN	227	EEQYJSTFR	6 4 0 0 0		149	sp|P01859|IGHG2_HUMAN	176	TKPREEQFJSTFR	4 4 0 0 0
150	sp|P01860|IGHG3_HUMAN	227	TKPREEQYJSTFR	3 4 0 0 0		150	sp|P01859|IGHG2_HUMAN	176	TKPREEQFJSTFR	4 4 0 0 1
151	sp|P01860|IGHG3_HUMAN	227	TKPREEQYJSTFR	3 4 0 0 1		151	sp|P01859|IGHG2_HUMAN	176	TKPREEQFJSTFR	4 4 0 0 2
152	sp|P01860|IGHG3_HUMAN	227	TKPREEQYJSTFR	4 4 0 0 0		152	sp|P01859|IGHG2_HUMAN	176	TKPREEQFJSTFR	4 4 1 0 0
153	sp|P01860|IGHG3_HUMAN	227	TKPREEQYJSTFR	4 4 0 0 1		153	sp|P01859|IGHG2_HUMAN	176	TKPREEQFJSTFR	4 4 1 0 1
154	sp|P01860|IGHG3_HUMAN	227	TKPREEQYJSTFR	4 4 1 0 1		154	sp|P01859|IGHG2_HUMAN	176	TKPREEQFJSTFR	4 5 0 0 0
155	sp|P01860|IGHG3_HUMAN	227	TKPREEQYJSTFR	4 5 0 0 1		155	sp|P01859|IGHG2_HUMAN	176	TKPREEQFJSTFR	4 5 0 0 1
156	sp|P01860|IGHG3_HUMAN	227	TKPREEQYJSTFR	5 4 0 0 0		156	sp|P01859|IGHG2_HUMAN	176	TKPREEQFJSTFR	4 5 1 0 0
157	sp|P01860|IGHG3_HUMAN	227	TKPREEQYJSTFR	5 4 0 0 1		157	sp|P01859|IGHG2_HUMAN	176	TKPREEQFJSTFR	4 5 1 0 1
158	sp|P01860|IGHG3_HUMAN	227	TKPREEQYJSTFR	5 4 1 0 0		158	sp|P01859|IGHG2_HUMAN	176	TKPREEQFJSTFR	5 3 0 0 1
159	sp|P01860|IGHG3_HUMAN	227	TKPREEQYJSTFR	5 4 1 0 1		159	sp|P01859|IGHG2_HUMAN	176	TKPREEQFJSTFR	5 3 1 0 1
160	sp|P01860|IGHG3_HUMAN	227	TKPREEQYJSTFR	5 5 0 0 1		160	sp|P01859|IGHG2_HUMAN	176	TKPREEQFJSTFR	5 4 0 0 0
161	sp|P01861|IGHG4_HUMAN	177	EEQFJSTYR	3 4 0 0 1		161	sp|P01859|IGHG2_HUMAN	176	TKPREEQFJSTFR	5 4 0 0 1
162	sp|P01861|IGHG4_HUMAN	177	EEQFJSTYR	3 5 0 0 1		162	sp|P01859|IGHG2_HUMAN	176	TKPREEQFJSTFR	5 4 0 0 2
163	sp|P01861|IGHG4_HUMAN	177	EEQFJSTYR	3 5 1 0 2		163	sp|P01859|IGHG2_HUMAN	176	TKPREEQFJSTFR	5 4 1 0 0
164	sp|P01861|IGHG4_HUMAN	177	EEQFJSTYR	3 6 0 0 0		164	sp|P01859|IGHG2_HUMAN	176	TKPREEQFJSTFR	5 4 1 0 1
165	sp|P01861|IGHG4_HUMAN	177	EEQFJSTYR	4 4 0 0 1		165	sp|P01859|IGHG2_HUMAN	176	TKPREEQFJSTFR	5 4 1 0 2
166	sp|P01861|IGHG4_HUMAN	177	EEQFJSTYR	4 4 1 0 1		166	sp|P01859|IGHG2_HUMAN	176	TKPREEQFJSTFR	5 4 2 0 1
167	sp|P01861|IGHG4_HUMAN	177	EEQFJSTYR	4 5 0 0 0		167	sp|P01859|IGHG2_HUMAN	176	TKPREEQFJSTFR	5 5 0 0 0
168	sp|P01861|IGHG4_HUMAN	177	EEQFJSTYR	4 5 0 0 1		168	sp|P01859|IGHG2_HUMAN	176	TKPREEQFJSTFR	5 5 0 0 1
169	sp|P01861|IGHG4_HUMAN	177	EEQFJSTYR	5 4 0 0 0		169	sp|P01859|IGHG2_HUMAN	176	TKPREEQFJSTFR	5 5 1 0 0
170	sp|P01861|IGHG4_HUMAN	177	EEQFJSTYR	5 4 0 0 1		170	sp|P01859|IGHG2_HUMAN	176	TKPREEQFJSTFR	5 5 1 0 1
171	sp|P01861|IGHG4_HUMAN	177	EEQFJSTYR	5 4 1 0 1		171	sp|P01859|IGHG2_HUMAN	176	TKPREEQFJSTFR	5 7 1 0 5
172	sp|P01861|IGHG4_HUMAN	177	EEQFJSTYR	6 4 1 0 0		172	sp|P01859|IGHG2_HUMAN	176	TKPREEQFJSTFR	6 3 1 0 1
173	sp|P01861|IGHG4_HUMAN	177	EEQFJSTYR	8 2 0 0 1		173	sp|P01859|IGHG2_HUMAN	176	TKPREEQFJSTFR	6 4 0 0 1
174	sp|P01861|IGHG4_HUMAN	177	TKPREEQFJSTYR	3 4 0 0 0		174	sp|P01859|IGHG2_HUMAN	176	TKPREEQFJSTFR	6 4 1 0 1
175	sp|P01861|IGHG4_HUMAN	177	TKPREEQFJSTYR	3 5 0 0 1		175	sp|P01859|IGHG2_HUMAN	176	TKPREEQFJSTFR	7 2 0 0 1
176	sp|P01861|IGHG4_HUMAN	177	TKPREEQFJSTYR	4 4 0 0 0		176	sp|P01860|IGHG3_HUMAN	227	EEQYJSTFR	2 3 0 0 1
177	sp|P01861|IGHG4_HUMAN	177	TKPREEQFJSTYR	4 4 1 0 1		177	sp|P01860|IGHG3_HUMAN	227	EEQYJSTFR	3 4 0 0 0
178	sp|P01861|IGHG4_HUMAN	177	TKPREEQFJSTYR	4 5 0 0 1		178	sp|P01860|IGHG3_HUMAN	227	EEQYJSTFR	3 4 0 0 1
179	sp|P01861|IGHG4_HUMAN	177	TKPREEQFJSTYR	5 4 0 0 0		179	sp|P01860|IGHG3_HUMAN	227	EEQYJSTFR	4 3 0 0 1
180	sp|P01861|IGHG4_HUMAN	177	TKPREEQFJSTYR	5 4 0 0 1		180	sp|P01860|IGHG3_HUMAN	227	EEQYJSTFR	4 4 0 0 0
181	sp|P01861|IGHG4_HUMAN	177	TKPREEQFJSTYR	5 4 1 0 0		181	sp|P01860|IGHG3_HUMAN	227	EEQYJSTFR	4 4 0 0 1
[a] Peptide sequence with ‘J’ indicating the N-glycosylation site.						182	sp|P01860|IGHG3_HUMAN	227	EEQYJSTFR	4 5 0 0 0
						183	sp|P01860|IGHG3_HUMAN	227	EEQYJSTFR	4 5 0 0 1
						184	sp|P01860|IGHG3_HUMAN	227	EEQYJSTFR	5 4 0 0 0
						185	sp|P01860|IGHG3_HUMAN	227	EEQYJSTFR	5 4 0 0 1
						186	sp|P01860|IGHG3_HUMAN	227	EEQYJSTFR	5 4 1 0 0
						187	sp|P01860|IGHG3_HUMAN	227	EEQYJSTFR	5 4 1 0 1
						188	sp|P01860|IGHG3_HUMAN	227	EEQYJSTFR	5 5 0 0 1
						189	sp|P01860|IGHG3_HUMAN	227	TKPREEQYJSTFR	3 3 0 0 1
						190	sp|P01860|IGHG3_HUMAN	227	TKPREEQYJSTFR	3 4 0 0 0
						191	sp|P01860|IGHG3_HUMAN	227	TKPREEQYJSTFR	3 4 0 0 1
						192	sp|P01860|IGHG3_HUMAN	227	TKPREEQYJSTFR	3 5 0 0 0
						193	sp|P01860|IGHG3_HUMAN	227	TKPREEQYJSTFR	3 5 0 0 1
						194	sp|P01860|IGHG3_HUMAN	227	TKPREEQYJSTFR	4 4 0 0 0
						195	sp|P01860|IGHG3_HUMAN	227	TKPREEQYJSTFR	4 4 0 0 1
						196	sp|P01860|IGHG3_HUMAN	227	TKPREEQYJSTFR	4 4 1 0 1
						197	sp|P01860|IGHG3_HUMAN	227	TKPREEQYJSTFR	4 5 0 0 0
						198	sp|P01860|IGHG3_HUMAN	227	TKPREEQYJSTFR	4 5 0 0 1
						199	sp|P01860|IGHG3_HUMAN	227	TKPREEQYJSTFR	4 5 1 0 1
						200	sp|P01860|IGHG3_HUMAN	227	TKPREEQYJSTFR	5 4 0 0 0
						201	sp|P01860|IGHG3_HUMAN	227	TKPREEQYJSTFR	5 4 0 0 1
						202	sp|P01860|IGHG3_HUMAN	227	TKPREEQYJSTFR	5 4 1 0 0
						203	sp|P01860|IGHG3_HUMAN	227	TKPREEQYJSTFR	5 4 1 0 1
						204	sp|P01860|IGHG3_HUMAN	227	TKPREEQYJSTFR	5 5 0 0 1
						205	sp|P01860|IGHG3_HUMAN	227	TKPREEQYJSTFR	5 5 1 0 1
						206	sp|P01861|IGHG4_HUMAN	177	EEQFJSTYR	3 3 0 0 1
						207	sp|P01861|IGHG4_HUMAN	177	EEQFJSTYR	3 4 0 0 0
						208	sp|P01861|IGHG4_HUMAN	177	EEQFJSTYR	3 4 0 0 1
						209	sp|P01861|IGHG4_HUMAN	177	EEQFJSTYR	3 5 0 0 1
						210	sp|P01861|IGHG4_HUMAN	177	EEQFJSTYR	4 3 0 0 2
						211	sp|P01861|IGHG4_HUMAN	177	EEQFJSTYR	4 4 0 0 1
						212	sp|P01861|IGHG4_HUMAN	177	EEQFJSTYR	4 4 1 0 1
						213	sp|P01861|IGHG4_HUMAN	177	EEQFJSTYR	4 5 0 0 1
						214	sp|P01861|IGHG4_HUMAN	177	EEQFJSTYR	5 4 0 0 1
						215	sp|P01861|IGHG4_HUMAN	177	EEQFJSTYR	5 4 1 0 1
						216	sp|P01861|IGHG4_HUMAN	177	EEQFJSTYR	5 5 0 0 1
						217	sp|P01861|IGHG4_HUMAN	177	TKPREEQFJSTYR	3 4 0 0 0
						218	sp|P01861|IGHG4_HUMAN	177	TKPREEQFJSTYR	3 4 0 0 1
						219	sp|P01861|IGHG4_HUMAN	177	TKPREEQFJSTYR	3 5 0 0 1
						220	sp|P01861|IGHG4_HUMAN	177	TKPREEQFJSTYR	4 3 0 0 2
						221	sp|P01861|IGHG4_HUMAN	177	TKPREEQFJSTYR	4 3 0 0 3
						222	sp|P01861|IGHG4_HUMAN	177	TKPREEQFJSTYR	4 4 0 0 0
						223	sp|P01861|IGHG4_HUMAN	177	TKPREEQFJSTYR	4 4 0 0 1
						224	sp|P01861|IGHG4_HUMAN	177	TKPREEQFJSTYR	4 4 1 0 1
						225	sp|P01861|IGHG4_HUMAN	177	TKPREEQFJSTYR	4 5 0 0 0
						226	sp|P01861|IGHG4_HUMAN	177	TKPREEQFJSTYR	4 5 0 0 1
						227	sp|P01861|IGHG4_HUMAN	177	TKPREEQFJSTYR	5 4 0 0 0
						228	sp|P01861|IGHG4_HUMAN	177	TKPREEQFJSTYR	5 4 0 0 1
						229	sp|P01861|IGHG4_HUMAN	177	TKPREEQFJSTYR	5 4 1 0 1
						230	sp|P01861|IGHG4_HUMAN	177	TKPREEQFJSTYR	5 4 2 0 1
						231	sp|P01861|IGHG4_HUMAN	177	TKPREEQFJSTYR	5 5 0 0 1
						232	sp|P01861|IGHG4_HUMAN	177	TKPREEQFJSTYR	6 4 1 0 1
						[a] Peptide sequence with ‘J’ indicating the N-glycosylation site.

## Sheet: Table S2
Table S2. Intact glycopeptides identified from 10 mg fetuin with Intact GlycoSISPROT under three replicates.
No	Proteins	ProSites	Amino acid sequence	Glycan composition (Glycan(H,N,A,G,F)
1	sp|P12825|FETUA_BOVIN	99	RPTGEVYDIEIDTLETTCHVLDPTPLAJCSVR	4 5 2 0 2
2	sp|P12825|FETUA_BOVIN	99	RPTGEVYDIEIDTLETTCHVLDPTPLAJCSVR	4 6 1 0 5
3	sp|P12825|FETUA_BOVIN	99	RPTGEVYDIEIDTLETTCHVLDPTPLAJCSVR	5 4 0 0 0
4	sp|P12825|FETUA_BOVIN	99	RPTGEVYDIEIDTLETTCHVLDPTPLAJCSVR	5 4 1 0 0
5	sp|P12825|FETUA_BOVIN	99	RPTGEVYDIEIDTLETTCHVLDPTPLAJCSVR	5 4 1 0 1
6	sp|P12825|FETUA_BOVIN	99	RPTGEVYDIEIDTLETTCHVLDPTPLAJCSVR	5 4 1 0 2
7	sp|P12825|FETUA_BOVIN	99	RPTGEVYDIEIDTLETTCHVLDPTPLAJCSVR	5 4 1 0 3
8	sp|P12825|FETUA_BOVIN	99	RPTGEVYDIEIDTLETTCHVLDPTPLAJCSVR	5 4 1 0 4
9	sp|P12825|FETUA_BOVIN	99	RPTGEVYDIEIDTLETTCHVLDPTPLAJCSVR	5 4 1 1 0
10	sp|P12825|FETUA_BOVIN	99	RPTGEVYDIEIDTLETTCHVLDPTPLAJCSVR	5 4 2 0 0
11	sp|P12825|FETUA_BOVIN	99	RPTGEVYDIEIDTLETTCHVLDPTPLAJCSVR	5 4 2 0 1
12	sp|P12825|FETUA_BOVIN	99	RPTGEVYDIEIDTLETTCHVLDPTPLAJCSVR	5 4 3 0 0
13	sp|P12825|FETUA_BOVIN	99	RPTGEVYDIEIDTLETTCHVLDPTPLAJCSVR	5 5 2 0 3
14	sp|P12825|FETUA_BOVIN	99	RPTGEVYDIEIDTLETTCHVLDPTPLAJCSVR	5 6 1 0 4
15	sp|P12825|FETUA_BOVIN	99	RPTGEVYDIEIDTLETTCHVLDPTPLAJCSVR	6 4 1 0 1
16	sp|P12825|FETUA_BOVIN	99	RPTGEVYDIEIDTLETTCHVLDPTPLAJCSVR	6 4 2 0 1
17	sp|P12825|FETUA_BOVIN	99	RPTGEVYDIEIDTLETTCHVLDPTPLAJCSVR	6 5 0 0 0
18	sp|P12825|FETUA_BOVIN	99	RPTGEVYDIEIDTLETTCHVLDPTPLAJCSVR	6 5 1 0 0
19	sp|P12825|FETUA_BOVIN	99	RPTGEVYDIEIDTLETTCHVLDPTPLAJCSVR	6 5 1 0 1
20	sp|P12825|FETUA_BOVIN	99	RPTGEVYDIEIDTLETTCHVLDPTPLAJCSVR	6 5 1 0 2
21	sp|P12825|FETUA_BOVIN	99	RPTGEVYDIEIDTLETTCHVLDPTPLAJCSVR	6 5 1 0 3
22	sp|P12825|FETUA_BOVIN	99	RPTGEVYDIEIDTLETTCHVLDPTPLAJCSVR	6 5 1 0 4
23	sp|P12825|FETUA_BOVIN	99	RPTGEVYDIEIDTLETTCHVLDPTPLAJCSVR	6 5 2 0 0
24	sp|P12825|FETUA_BOVIN	99	RPTGEVYDIEIDTLETTCHVLDPTPLAJCSVR	6 5 2 0 1
25	sp|P12825|FETUA_BOVIN	99	RPTGEVYDIEIDTLETTCHVLDPTPLAJCSVR	6 5 2 0 2
26	sp|P12825|FETUA_BOVIN	99	RPTGEVYDIEIDTLETTCHVLDPTPLAJCSVR	6 5 2 0 4
27	sp|P12825|FETUA_BOVIN	99	RPTGEVYDIEIDTLETTCHVLDPTPLAJCSVR	6 5 3 0 0
28	sp|P12825|FETUA_BOVIN	99	RPTGEVYDIEIDTLETTCHVLDPTPLAJCSVR	6 5 3 0 2
29	sp|P12825|FETUA_BOVIN	99	RPTGEVYDIEIDTLETTCHVLDPTPLAJCSVR	6 5 4 0 0
30	sp|P12825|FETUA_BOVIN	99	RPTGEVYDIEIDTLETTCHVLDPTPLAJCSVR	7 5 0 0 1
31	sp|P12825|FETUA_BOVIN	99	RPTGEVYDIEIDTLETTCHVLDPTPLAJCSVR	7 5 1 0 1
32	sp|P12825|FETUA_BOVIN	99	RPTGEVYDIEIDTLETTCHVLDPTPLAJCSVR	7 5 1 0 2
33	sp|P12825|FETUA_BOVIN	99	RPTGEVYDIEIDTLETTCHVLDPTPLAJCSVR	7 5 1 0 3
34	sp|P12825|FETUA_BOVIN	99	RPTGEVYDIEIDTLETTCHVLDPTPLAJCSVR	7 5 2 0 1
35	sp|P12825|FETUA_BOVIN	99	RPTGEVYDIEIDTLETTCHVLDPTPLAJCSVR	7 5 2 0 3
36	sp|P12825|FETUA_BOVIN	99	RPTGEVYDIEIDTLETTCHVLDPTPLAJCSVR	7 5 3 0 1
37	sp|P12825|FETUA_BOVIN	99	RPTGEVYDIEIDTLETTCHVLDPTPLAJCSVR	7 6 1 0 2
38	sp|P12825|FETUA_BOVIN	99	RPTGEVYDIEIDTLETTCHVLDPTPLAJCSVR	7 6 2 0 0
39	sp|P12825|FETUA_BOVIN	99	RPTGEVYDIEIDTLETTCHVLDPTPLAJCSVR	7 6 4 0 0
40	sp|P12825|FETUA_BOVIN	99	RPTGEVYDIEIDTLETTCHVLDPTPLAJCSVR	8 5 1 0 0
41	sp|P12825|FETUA_BOVIN	99	RPTGEVYDIEIDTLETTCHVLDPTPLAJCSVR	8 5 1 0 1
42	sp|P12825|FETUA_BOVIN	99	RPTGEVYDIEIDTLETTCHVLDPTPLAJCSVR	8 5 1 0 2
43	sp|P12825|FETUA_BOVIN	99	RPTGEVYDIEIDTLETTCHVLDPTPLAJCSVR	8 6 2 0 3
44	sp|P12825|FETUA_BOVIN	99	RPTGEVYDIEIDTLETTCHVLDPTPLAJCSVR	8 6 3 0 1
45	sp|P12825|FETUA_BOVIN	99	RPTGEVYDIEIDTLETTCHVLDPTPLAJCSVR	8 7 1 0 1
46	sp|P12825|FETUA_BOVIN	99	RPTGEVYDIEIDTLETTCHVLDPTPLAJCSVR	9 6 1 0 4
47	sp|P12825|FETUA_BOVIN	99	RPTGEVYDIEIDTLETTCHVLDPTPLAJCSVR	9 7 1 0 0
48	sp|P12763|FETUA_BOVIN	156	CDSSPDSAEDVRKLCPDCPLLAPLJDSR	5 4 1 0 0
49	sp|P12763|FETUA_BOVIN	156	CDSSPDSAEDVRKLCPDCPLLAPLJDSR	5 4 1 0 2
50	sp|P12763|FETUA_BOVIN	156	CDSSPDSAEDVRKLCPDCPLLAPLJDSR	5 4 2 0 0
51	sp|P12763|FETUA_BOVIN	156	CDSSPDSAEDVRKLCPDCPLLAPLJDSR	6 5 1 0 0
52	sp|P12763|FETUA_BOVIN	156	CDSSPDSAEDVRKLCPDCPLLAPLJDSR	6 5 1 0 2
53	sp|P12763|FETUA_BOVIN	156	CDSSPDSAEDVRKLCPDCPLLAPLJDSR	6 5 2 0 0
54	sp|P12763|FETUA_BOVIN	156	CDSSPDSAEDVRKLCPDCPLLAPLJDSR	6 5 2 0 2
55	sp|P12763|FETUA_BOVIN	156	CDSSPDSAEDVRKLCPDCPLLAPLJDSR	6 5 3 0 0
56	sp|P12763|FETUA_BOVIN	156	CDSSPDSAEDVRKLCPDCPLLAPLJDSR	7 5 2 0 1
57	sp|P12763|FETUA_BOVIN	156	KLCPDCPLLAPLJDSR	3 3 1 0 0
58	sp|P12763|FETUA_BOVIN	156	KLCPDCPLLAPLJDSR	4 3 1 0 0
59	sp|P12763|FETUA_BOVIN	156	KLCPDCPLLAPLJDSR	4 4 1 0 0
60	sp|P12763|FETUA_BOVIN	156	KLCPDCPLLAPLJDSR	5 4 0 0 0
61	sp|P12763|FETUA_BOVIN	156	KLCPDCPLLAPLJDSR	5 4 0 1 0
62	sp|P12763|FETUA_BOVIN	156	KLCPDCPLLAPLJDSR	5 4 1 0 0
63	sp|P12763|FETUA_BOVIN	156	KLCPDCPLLAPLJDSR	5 4 1 0 1
64	sp|P12763|FETUA_BOVIN	156	KLCPDCPLLAPLJDSR	5 4 1 1 0
65	sp|P12763|FETUA_BOVIN	156	KLCPDCPLLAPLJDSR	5 4 2 0 0
66	sp|P12763|FETUA_BOVIN	156	KLCPDCPLLAPLJDSR	5 4 2 0 1
67	sp|P12763|FETUA_BOVIN	156	KLCPDCPLLAPLJDSR	5 4 3 0 0
68	sp|P12763|FETUA_BOVIN	156	KLCPDCPLLAPLJDSR	5 5 1 0 1
69	sp|P12763|FETUA_BOVIN	156	KLCPDCPLLAPLJDSR	5 5 2 0 0
70	sp|P12763|FETUA_BOVIN	156	KLCPDCPLLAPLJDSR	5 5 2 0 1
71	sp|P12763|FETUA_BOVIN	156	KLCPDCPLLAPLJDSR	5 5 2 0 3
72	sp|P12763|FETUA_BOVIN	156	KLCPDCPLLAPLJDSR	6 4 1 0 0
73	sp|P12763|FETUA_BOVIN	156	KLCPDCPLLAPLJDSR	6 4 1 0 1
74	sp|P12763|FETUA_BOVIN	156	KLCPDCPLLAPLJDSR	6 4 1 0 2
75	sp|P12763|FETUA_BOVIN	156	KLCPDCPLLAPLJDSR	6 4 2 0 1
76	sp|P12763|FETUA_BOVIN	156	KLCPDCPLLAPLJDSR	6 5 0 0 0
77	sp|P12763|FETUA_BOVIN	156	KLCPDCPLLAPLJDSR	6 5 1 0 0
78	sp|P12763|FETUA_BOVIN	156	KLCPDCPLLAPLJDSR	6 5 1 0 1
79	sp|P12763|FETUA_BOVIN	156	KLCPDCPLLAPLJDSR	6 5 1 0 3
80	sp|P12763|FETUA_BOVIN	156	KLCPDCPLLAPLJDSR	6 5 1 0 4
81	sp|P12763|FETUA_BOVIN	156	KLCPDCPLLAPLJDSR	6 5 2 0 0
82	sp|P12763|FETUA_BOVIN	156	KLCPDCPLLAPLJDSR	6 5 2 0 1
83	sp|P12763|FETUA_BOVIN	156	KLCPDCPLLAPLJDSR	6 5 2 0 2
84	sp|P12763|FETUA_BOVIN	156	KLCPDCPLLAPLJDSR	6 5 3 0 0
85	sp|P12763|FETUA_BOVIN	156	KLCPDCPLLAPLJDSR	6 5 3 0 1
86	sp|P12763|FETUA_BOVIN	156	KLCPDCPLLAPLJDSR	6 5 3 0 2
87	sp|P12763|FETUA_BOVIN	156	KLCPDCPLLAPLJDSR	6 5 4 0 0
88	sp|P12763|FETUA_BOVIN	156	KLCPDCPLLAPLJDSR	6 6 2 0 1
89	sp|P12763|FETUA_BOVIN	156	KLCPDCPLLAPLJDSR	6 6 3 0 0
90	sp|P12763|FETUA_BOVIN	156	KLCPDCPLLAPLJDSR	7 5 1 0 1
91	sp|P12763|FETUA_BOVIN	156	KLCPDCPLLAPLJDSR	7 5 1 0 2
92	sp|P12763|FETUA_BOVIN	156	KLCPDCPLLAPLJDSR	7 5 1 1 1
93	sp|P12763|FETUA_BOVIN	156	KLCPDCPLLAPLJDSR	7 5 2 0 1
94	sp|P12763|FETUA_BOVIN	156	KLCPDCPLLAPLJDSR	7 5 2 0 2
95	sp|P12763|FETUA_BOVIN	156	KLCPDCPLLAPLJDSR	7 5 2 0 3
96	sp|P12763|FETUA_BOVIN	156	KLCPDCPLLAPLJDSR	7 5 3 0 1
97	sp|P12763|FETUA_BOVIN	156	KLCPDCPLLAPLJDSR	7 6 2 0 0
98	sp|P12763|FETUA_BOVIN	156	KLCPDCPLLAPLJDSR	8 5 1 0 2
99	sp|P12763|FETUA_BOVIN	156	KLCPDCPLLAPLJDSR	9 7 1 0 0
100	sp|P12763|FETUA_BOVIN	156	LCPDCPLLAPLJDSR	3 3 1 0 0
101	sp|P12763|FETUA_BOVIN	156	LCPDCPLLAPLJDSR	4 3 1 0 0
102	sp|P12763|FETUA_BOVIN	156	LCPDCPLLAPLJDSR	4 4 1 0 0
103	sp|P12763|FETUA_BOVIN	156	LCPDCPLLAPLJDSR	5 4 0 0 0
104	sp|P12763|FETUA_BOVIN	156	LCPDCPLLAPLJDSR	5 4 1 0 0
105	sp|P12763|FETUA_BOVIN	156	LCPDCPLLAPLJDSR	5 4 1 0 1
106	sp|P12763|FETUA_BOVIN	156	LCPDCPLLAPLJDSR	5 4 1 0 2
107	sp|P12763|FETUA_BOVIN	156	LCPDCPLLAPLJDSR	5 4 1 0 3
108	sp|P12763|FETUA_BOVIN	156	LCPDCPLLAPLJDSR	5 4 1 0 4
109	sp|P12763|FETUA_BOVIN	156	LCPDCPLLAPLJDSR	5 4 1 1 0
110	sp|P12763|FETUA_BOVIN	156	LCPDCPLLAPLJDSR	5 4 2 0 0
111	sp|P12763|FETUA_BOVIN	156	LCPDCPLLAPLJDSR	5 4 2 0 1
112	sp|P12763|FETUA_BOVIN	156	LCPDCPLLAPLJDSR	5 4 2 0 2
113	sp|P12763|FETUA_BOVIN	156	LCPDCPLLAPLJDSR	5 4 3 0 0
114	sp|P12763|FETUA_BOVIN	156	LCPDCPLLAPLJDSR	5 5 1 0 1
115	sp|P12763|FETUA_BOVIN	156	LCPDCPLLAPLJDSR	5 5 2 0 0
116	sp|P12763|FETUA_BOVIN	156	LCPDCPLLAPLJDSR	5 5 2 0 1
117	sp|P12763|FETUA_BOVIN	156	LCPDCPLLAPLJDSR	5 5 2 0 3
118	sp|P12763|FETUA_BOVIN	156	LCPDCPLLAPLJDSR	5 5 3 0 0
119	sp|P12763|FETUA_BOVIN	156	LCPDCPLLAPLJDSR	5 5 3 0 1
120	sp|P12763|FETUA_BOVIN	156	LCPDCPLLAPLJDSR	5 7 2 0 5
121	sp|P12763|FETUA_BOVIN	156	LCPDCPLLAPLJDSR	6 3 1 0 0
122	sp|P12763|FETUA_BOVIN	156	LCPDCPLLAPLJDSR	6 4 1 0 0
123	sp|P12763|FETUA_BOVIN	156	LCPDCPLLAPLJDSR	6 4 1 0 1
124	sp|P12763|FETUA_BOVIN	156	LCPDCPLLAPLJDSR	6 4 1 0 2
125	sp|P12763|FETUA_BOVIN	156	LCPDCPLLAPLJDSR	6 4 1 0 3
126	sp|P12763|FETUA_BOVIN	156	LCPDCPLLAPLJDSR	6 4 2 0 0
127	sp|P12763|FETUA_BOVIN	156	LCPDCPLLAPLJDSR	6 4 2 0 1
128	sp|P12763|FETUA_BOVIN	156	LCPDCPLLAPLJDSR	6 5 0 0 0
129	sp|P12763|FETUA_BOVIN	156	LCPDCPLLAPLJDSR	6 5 1 0 0
130	sp|P12763|FETUA_BOVIN	156	LCPDCPLLAPLJDSR	6 5 1 0 1
131	sp|P12763|FETUA_BOVIN	156	LCPDCPLLAPLJDSR	6 5 1 0 2
132	sp|P12763|FETUA_BOVIN	156	LCPDCPLLAPLJDSR	6 5 1 0 3
133	sp|P12763|FETUA_BOVIN	156	LCPDCPLLAPLJDSR	6 5 1 2 0
134	sp|P12763|FETUA_BOVIN	156	LCPDCPLLAPLJDSR	6 5 2 0 0
135	sp|P12763|FETUA_BOVIN	156	LCPDCPLLAPLJDSR	6 5 2 0 1
136	sp|P12763|FETUA_BOVIN	156	LCPDCPLLAPLJDSR	6 5 2 0 2
137	sp|P12763|FETUA_BOVIN	156	LCPDCPLLAPLJDSR	6 5 2 0 3
138	sp|P12763|FETUA_BOVIN	156	LCPDCPLLAPLJDSR	6 5 2 0 4
139	sp|P12763|FETUA_BOVIN	156	LCPDCPLLAPLJDSR	6 5 3 0 0
140	sp|P12763|FETUA_BOVIN	156	LCPDCPLLAPLJDSR	6 5 3 0 1
141	sp|P12763|FETUA_BOVIN	156	LCPDCPLLAPLJDSR	6 5 3 0 2
142	sp|P12763|FETUA_BOVIN	156	LCPDCPLLAPLJDSR	6 5 4 0 0
143	sp|P12763|FETUA_BOVIN	156	LCPDCPLLAPLJDSR	7 4 1 0 0
144	sp|P12763|FETUA_BOVIN	156	LCPDCPLLAPLJDSR	7 5 1 0 1
145	sp|P12763|FETUA_BOVIN	156	LCPDCPLLAPLJDSR	7 5 1 0 2
146	sp|P12763|FETUA_BOVIN	156	LCPDCPLLAPLJDSR	7 5 1 1 1
147	sp|P12763|FETUA_BOVIN	156	LCPDCPLLAPLJDSR	7 5 2 0 0
148	sp|P12763|FETUA_BOVIN	156	LCPDCPLLAPLJDSR	7 5 2 0 1
149	sp|P12763|FETUA_BOVIN	156	LCPDCPLLAPLJDSR	7 5 2 0 2
150	sp|P12763|FETUA_BOVIN	156	LCPDCPLLAPLJDSR	7 5 2 0 3
151	sp|P12763|FETUA_BOVIN	156	LCPDCPLLAPLJDSR	7 5 3 0 1
152	sp|P12763|FETUA_BOVIN	156	LCPDCPLLAPLJDSR	7 6 1 0 0
153	sp|P12763|FETUA_BOVIN	156	LCPDCPLLAPLJDSR	8 5 1 0 0
154	sp|P12763|FETUA_BOVIN	156	LCPDCPLLAPLJDSR	8 5 1 0 2
155	sp|P12763|FETUA_BOVIN	156	LCPDCPLLAPLJDSR	8 7 1 0 1
156	sp|P12763|FETUA_BOVIN	156	LCPDCPLLAPLJDSR	9 7 1 0 0
157	sp|P12872|FETUA_BOVIN	176	VVHAVEVALATFNAESJGSYLQLVEISR	6 5 1 0 0
158	sp|P12872|FETUA_BOVIN	176	VVHAVEVALATFNAESJGSYLQLVEISR	6 5 1 0 2
159	sp|P12872|FETUA_BOVIN	176	VVHAVEVALATFNAESJGSYLQLVEISR	6 5 2 0 0
160	sp|P12872|FETUA_BOVIN	176	VVHAVEVALATFNAESJGSYLQLVEISR	6 5 3 0 0
161	sp|P12872|FETUA_BOVIN	176	VVHAVEVALATFNAESJGSYLQLVEISR	7 5 1 0 1
[a] Peptide sequence with ‘J’ indicating the N-glycosylation site.

## Sheet: Table S3
Table S3-1. Intact glycopeptides identified from 1 mg KP4 with Intact GlycoSISPROT under three replicates.						Table S3-2. Intact glycopeptides identified from 1 mg KP4 with traditional method under three replicates.
No	Proteins	ProSite	Amino acid sequence	Glycan composition (Glycan(H,N,A,G,F)		No	Proteins	ProSite	Amino acid sequence	Glycan composition (Glycan(H,N,A,G,F)
1	sp|A8K2U0|A2ML1_HUMAN	857	THHWJITAVK	5 2 0 0 0		1	sp|O14672|ADA10_HUMAN	439	JISQVLEK	8 2 0 0 0
2	sp|A8K2U0|A2ML1_HUMAN	857	THHWJITAVK	6 2 0 0 0		2	sp|O15230|LAMA5_HUMAN	95	LVGGPVAGGDPJQTIR	8 2 0 0 0
3	sp|O14672|ADA10_HUMAN	278	IJTTADEKDPTNPFR	9 2 0 0 0		3	sp|O75882|ATRN_HUMAN	416	IDSTGJVTNELR	8 2 0 0 0
4	sp|O14672|ADA10_HUMAN	439	JISQVLEK	5 2 0 0 0		4	sp|O95631|NET1_HUMAN	95	SCHLCJASDPK	5 4 1 0 0
5	sp|O14672|ADA10_HUMAN	439	JISQVLEK	6 2 0 0 0		5	sp|P01033|TIMP1_HUMAN	101	SHJRSEEFLIAGK	3 6 0 0 2
6	sp|O14672|ADA10_HUMAN	439	JISQVLEK	7 2 0 0 0		6	sp|P01033|TIMP1_HUMAN	101	SHJRSEEFLIAGK	4 5 1 0 1
7	sp|O14672|ADA10_HUMAN	439	JISQVLEK	8 2 0 0 0		7	sp|P01033|TIMP1_HUMAN	101	SHJRSEEFLIAGK	4 5 1 0 2
8	sp|O15041|SEM3E_HUMAN	126	VLHHYJR	5 2 0 0 0		8	sp|P01033|TIMP1_HUMAN	101	SHJRSEEFLIAGK	4 5 2 0 1
9	sp|O15041|SEM3E_HUMAN	126	VLHHYJR	6 3 1 0 0		9	sp|P01033|TIMP1_HUMAN	101	SHJRSEEFLIAGK	5 4 2 0 1
10	sp|O15041|SEM3E_HUMAN	126	VLHHYJR	7 2 0 0 0		10	sp|P01033|TIMP1_HUMAN	101	SHJRSEEFLIAGK	6 4 0 0 1
11	sp|O15230|LAMA5_HUMAN	95	LVGGPVAGGDPJQTIR	5 2 0 0 0		11	sp|P05997|CO5A2_HUMAN	1400	EASQJITYICK	3 2 0 0 0
12	sp|O15230|LAMA5_HUMAN	95	LVGGPVAGGDPJQTIR	7 2 0 0 0		12	sp|P05997|CO5A2_HUMAN	1400	EASQJITYICK	4 2 0 0 0
13	sp|O15230|LAMA5_HUMAN	95	LVGGPVAGGDPJQTIR	8 2 0 0 0		13	sp|P05997|CO5A2_HUMAN	1400	EASQJITYICK	5 2 0 0 0
14	sp|O15230|LAMA5_HUMAN	1330	VWQGHAJASFCPHGYGCR	9 2 0 0 0		14	sp|P05997|CO5A2_HUMAN	1400	EASQJITYICK	6 2 0 0 0
15	sp|O15230|LAMA5_HUMAN	2423	DJATLQATLHAAR	5 4 0 0 1		15	sp|P05997|CO5A2_HUMAN	1400	EASQJITYICK	6 3 1 0 0
16	sp|O75882|ATRN_HUMAN	416	IDSTGJVTNELR	5 2 0 0 0		16	sp|P05997|CO5A2_HUMAN	1400	EASQJITYICK	7 2 0 0 0
17	sp|O75882|ATRN_HUMAN	416	IDSTGJVTNELR	6 2 0 0 0		17	sp|P05997|CO5A2_HUMAN	1400	EASQJITYICK	8 2 0 0 0
18	sp|O75882|ATRN_HUMAN	416	IDSTGJVTNELR	7 2 0 0 0		18	sp|P07996|TSP1_HUMAN	1067	VVJSTTGPGEHLR	4 5 0 0 0
19	sp|O75882|ATRN_HUMAN	416	IDSTGJVTNELR	8 2 0 0 0		19	sp|P07996|TSP1_HUMAN	1067	VVJSTTGPGEHLR	4 5 1 0 0
20	sp|O95171|SCEL_HUMAN	352	RSEDLDJATEVNPK	5 2 0 0 0		20	sp|P07996|TSP1_HUMAN	1067	VVJSTTGPGEHLR	4 5 2 0 0
21	sp|O95171|SCEL_HUMAN	352	RSEDLDJATEVNPK	6 2 0 0 0		21	sp|P07996|TSP1_HUMAN	1067	VVJSTTGPGEHLR	5 4 1 0 0
22	sp|P00533|EGFR_HUMAN	352	DSLSIJATNIK	5 2 0 0 0		22	sp|P07996|TSP1_HUMAN	1067	VVJSTTGPGEHLR	5 4 2 0 0
23	sp|P00533|EGFR_HUMAN	352	DSLSIJATNIK	6 2 0 0 0		23	sp|P07996|TSP1_HUMAN	1067	VVJSTTGPGEHLR	5 5 0 0 0
24	sp|P00533|EGFR_HUMAN	352	DSLSIJATNIK	7 2 0 0 0		24	sp|P10646|TFPI1_HUMAN	145	YFYNJQTK	3 6 0 0 2
25	sp|P01033|TIMP1_HUMAN	53	FVGTPEVJQTTLYQR	3 6 0 0 1		25	sp|P10646|TFPI1_HUMAN	145	YFYNJQTK	4 5 0 0 2
26	sp|P01033|TIMP1_HUMAN	53	FVGTPEVJQTTLYQR	3 6 0 0 2		26	sp|P10646|TFPI1_HUMAN	145	YFYNJQTK	4 5 2 0 1
27	sp|P01033|TIMP1_HUMAN	53	FVGTPEVJQTTLYQR	4 5 1 0 1		27	sp|P10909|CLUS_HUMAN	291	EIRHJSTGCLR	6 5 1 0 1
28	sp|P01033|TIMP1_HUMAN	53	FVGTPEVJQTTLYQR	4 5 2 0 1		28	sp|P10909|CLUS_HUMAN	291	EIRHJSTGCLR	7 6 2 0 1
29	sp|P01033|TIMP1_HUMAN	53	FVGTPEVJQTTLYQR	5 4 2 0 1		29	sp|P11717|MPRI_HUMAN	1312	MJFTGGDTCHK	7 2 0 0 0
30	sp|P01033|TIMP1_HUMAN	101	SHJRSEEFLIAGK	3 4 0 0 1		30	sp|P11717|MPRI_HUMAN	1312	MJFTGGDTCHK	8 2 0 0 0
31	sp|P01033|TIMP1_HUMAN	101	SHJRSEEFLIAGK	3 6 0 0 1		31	sp|P14210|HGF_HUMAN	653	GKVTLJESEICAGAEK	4 5 0 0 1
32	sp|P01033|TIMP1_HUMAN	101	SHJRSEEFLIAGK	3 6 0 0 2		32	sp|P19022|CADH2_HUMAN	651	RJWTITR	4 2 0 0 0
33	sp|P01033|TIMP1_HUMAN	101	SHJRSEEFLIAGK	3 6 0 0 3		33	sp|P19022|CADH2_HUMAN	651	RJWTITR	5 2 0 0 0
34	sp|P01033|TIMP1_HUMAN	101	SHJRSEEFLIAGK	4 3 0 0 1		34	sp|P19022|CADH2_HUMAN	692	SJISILR	5 2 0 0 0
35	sp|P01033|TIMP1_HUMAN	101	SHJRSEEFLIAGK	4 3 0 0 2		35	sp|P19022|CADH2_HUMAN	651	RJWTITR	6 2 0 0 0
36	sp|P01033|TIMP1_HUMAN	101	SHJRSEEFLIAGK	4 3 1 0 1		36	sp|P19022|CADH2_HUMAN	651	RJWTITR	7 2 0 0 0
37	sp|P01033|TIMP1_HUMAN	101	SHJRSEEFLIAGK	4 4 0 0 1		37	sp|P19022|CADH2_HUMAN	651	RJWTITR	8 2 0 0 0
38	sp|P01033|TIMP1_HUMAN	101	SHJRSEEFLIAGK	4 4 0 0 2		38	sp|P19022|CADH2_HUMAN	651	RJWTITR	9 2 0 0 0
39	sp|P01033|TIMP1_HUMAN	101	SHJRSEEFLIAGK	4 4 1 0 1		39	sp|P19022|CADH2_HUMAN/sp|P55283|CADH4_HUMAN	651/661	JWTITR	6 2 0 0 0
40	sp|P01033|TIMP1_HUMAN	101	SHJRSEEFLIAGK	4 5 0 0 1		40	sp|P19022|CADH2_HUMAN/sp|P55283|CADH4_HUMAN	651/661	JWTITR	8 2 0 0 0
41	sp|P01033|TIMP1_HUMAN	101	SHJRSEEFLIAGK	4 5 0 0 2		41	sp|P19022|CADH2_HUMAN/sp|P55283|CADH4_HUMAN	651/661	JWTITR	9 2 0 0 0
42	sp|P01033|TIMP1_HUMAN	101	SHJRSEEFLIAGK	4 5 0 0 3		42	sp|P24821|TENA_HUMAN	1034	JTTSYVLR	5 4 1 0 1
43	sp|P01033|TIMP1_HUMAN	101	SHJRSEEFLIAGK	4 5 1 0 1		43	sp|P55268|LAMB2_HUMAN	1499	AQAALDKAJASR	5 4 0 0 1
44	sp|P01033|TIMP1_HUMAN	101	SHJRSEEFLIAGK	4 5 1 0 2		44	sp|P78536|ADA17_HUMAN	174	SEDIKJVSR	5 2 0 0 0
45	sp|P01033|TIMP1_HUMAN	101	SHJRSEEFLIAGK	4 5 2 0 1		45	sp|P78536|ADA17_HUMAN	174	SEDIKJVSR	6 3 0 0 0
46	sp|P01033|TIMP1_HUMAN	101	SHJRSEEFLIAGK	5 4 0 0 2		46	sp|Q02809|PLOD1_HUMAN	538	YIHQJYTK	5 4 1 0 0
47	sp|P01033|TIMP1_HUMAN	101	SHJRSEEFLIAGK	5 4 1 0 1		47	sp|Q02809|PLOD1_HUMAN	538	YIHQJYTK	5 4 1 0 1
48	sp|P01033|TIMP1_HUMAN	101	SHJRSEEFLIAGK	5 4 1 0 2		48	sp|Q02809|PLOD1_HUMAN	538	YIHQJYTK	5 5 0 0 1
49	sp|P01033|TIMP1_HUMAN	101	SHJRSEEFLIAGK	5 4 2 0 1		49	sp|Q08380|LG3BP_HUMAN	551	AAIPSALDTJSSK	5 3 0 0 1
50	sp|P01033|TIMP1_HUMAN	101	SHJRSEEFLIAGK	5 5 0 0 1		50	sp|Q08380|LG3BP_HUMAN	551	AAIPSALDTJSSK	5 4 0 0 1
51	sp|P01033|TIMP1_HUMAN	101	SHJRSEEFLIAGK	5 6 2 0 1		51	sp|Q08380|LG3BP_HUMAN	551	AAIPSALDTJSSK	6 2 0 0 0
52	sp|P01033|TIMP1_HUMAN	101	SHJRSEEFLIAGK	6 4 0 0 1		52	sp|Q08380|LG3BP_HUMAN	551	AAIPSALDTJSSK	6 3 0 0 0
53	sp|P02786|TFR1_HUMAN	727	KQNNGAFJETLFR	7 2 0 0 0		53	sp|Q08380|LG3BP_HUMAN	551	AAIPSALDTJSSK	7 2 0 0 0
54	sp|P02786|TFR1_HUMAN	727	KQNNGAFJETLFR	8 2 0 0 0		54	sp|Q12866|MERTK_HUMAN	170	SDJGSYICK	5 4 0 0 0
55	sp|P02786|TFR1_HUMAN	727	QNNGAFJETLFR	7 2 0 0 0		55	sp|Q12866|MERTK_HUMAN	316	JCSIQVK	5 4 0 0 0
56	sp|P02786|TFR1_HUMAN	727	QNNGAFJETLFR	8 2 0 0 0		56	sp|Q12866|MERTK_HUMAN	316	JCSIQVK	5 4 1 0 0
57	sp|P04004|VTNC_HUMAN	169	JGSLFAFR	5 2 0 0 0		57	sp|Q12866|MERTK_HUMAN	316	JCSIQVK	5 5 0 0 0
58	sp|P05997|CO5A2_HUMAN	1400	EASQJITYICK	3 2 0 0 0		58	sp|Q12866|MERTK_HUMAN	316	JCSIQVK	6 2 0 0 0
59	sp|P05997|CO5A2_HUMAN	1400	EASQJITYICK	4 2 0 0 0		59	sp|Q12866|MERTK_HUMAN	170	SDJGSYICK	6 2 0 0 0
60	sp|P05997|CO5A2_HUMAN	1400	EASQJITYICK	5 2 0 0 0		60	sp|Q12866|MERTK_HUMAN	170	SDJGSYICK	6 3 0 0 0
61	sp|P05997|CO5A2_HUMAN	1400	EASQJITYICK	5 3 1 0 0		61	sp|Q4KMQ2|ANO6_HUMAN	361	LJITCESSK	8 2 0 0 0
62	sp|P05997|CO5A2_HUMAN	1400	EASQJITYICK	6 2 0 0 0		62	sp|Q6YHK3|CD109_HUMAN	247	HLJGTITAK	2 2 0 0 0
63	sp|P05997|CO5A2_HUMAN	1400	EASQJITYICK	6 3 1 0 0		63	sp|Q6YHK3|CD109_HUMAN	247	HLJGTITAK	4 2 0 0 0
64	sp|P05997|CO5A2_HUMAN	1400	EASQJITYICK	7 2 0 0 0		64	sp|Q6YHK3|CD109_HUMAN	247	HLJGTITAK	5 2 0 0 0
65	sp|P05997|CO5A2_HUMAN	1400	EASQJITYICK	8 2 0 0 0		65	sp|Q6YHK3|CD109_HUMAN	247	HLJGTITAK	6 2 0 0 0
66	sp|P05997|CO5A2_HUMAN	1400	LLSKEASQJITYICK	6 2 0 0 0		66	sp|Q6YHK3|CD109_HUMAN	247	HLJGTITAK	6 3 0 0 0
67	sp|P05997|CO5A2_HUMAN	1400	LLSKEASQJITYICK	7 2 0 0 0		67	sp|Q6YHK3|CD109_HUMAN	247	HLJGTITAK	6 3 1 0 0
68	sp|P07996|TSP1_HUMAN	1067	VVJSTTGPGEHLR	3 6 0 0 0		68	sp|Q6YHK3|CD109_HUMAN	247	HLJGTITAK	7 2 0 0 0
69	sp|P07996|TSP1_HUMAN	1067	VVJSTTGPGEHLR	4 5 0 0 0		69	sp|Q6YHK3|CD109_HUMAN	247	HLJGTITAK	8 2 0 0 0
70	sp|P07996|TSP1_HUMAN	1067	VVJSTTGPGEHLR	4 5 1 0 0		70	sp|Q8N184|ZN567_HUMAN	407	AJLTVHQR	4 3 1 0 0
71	sp|P07996|TSP1_HUMAN	1067	VVJSTTGPGEHLR	5 2 0 0 0		71	sp|Q92673|SORL_HUMAN	1894	SLTTSLHJK	7 2 0 0 0
72	sp|P07996|TSP1_HUMAN	1067	VVJSTTGPGEHLR	5 4 0 0 0		72	sp|Q92823|NRCAM_HUMAN	223	FJHTQTIQQK	4 3 0 0 1
73	sp|P07996|TSP1_HUMAN	1067	VVJSTTGPGEHLR	5 4 1 0 0		73	sp|Q92823|NRCAM_HUMAN	223	FJHTQTIQQK	5 2 0 0 0
74	sp|P07996|TSP1_HUMAN	1067	VVJSTTGPGEHLR	5 4 2 0 0		74	sp|Q92823|NRCAM_HUMAN	223	FJHTQTIQQK	5 3 0 0 0
75	sp|P07996|TSP1_HUMAN	1067	VVJSTTGPGEHLR	5 5 0 0 0		75	sp|Q92823|NRCAM_HUMAN	223	FJHTQTIQQK	5 3 0 0 1
76	sp|P07996|TSP1_HUMAN	1067	VVJSTTGPGEHLR	7 4 0 0 0		76	sp|Q92823|NRCAM_HUMAN	223	FJHTQTIQQK	5 4 0 0 1
77	sp|P08236|BGLR_HUMAN	272	VVAJGTGTQGQLK	5 2 0 0 0		77	sp|Q92823|NRCAM_HUMAN	223	FJHTQTIQQK	5 4 1 0 1
78	sp|P10253|LYAG_HUMAN	390	QVVEJMTR	3 2 0 0 0		78	sp|Q92823|NRCAM_HUMAN	223	FJHTQTIQQK	5 7 1 0 0
79	sp|P10646|TFPI1_HUMAN	145	YFYNJQTK	3 6 0 0 2		79	sp|Q92823|NRCAM_HUMAN	223	FJHTQTIQQK	6 2 0 0 0
80	sp|P10646|TFPI1_HUMAN	145	YFYNJQTK	4 5 2 0 1		80	sp|Q92823|NRCAM_HUMAN	223	FJHTQTIQQK	7 2 0 0 0
81	sp|P11047|LAMC1_HUMAN	650	LLNJLTSIK	6 2 0 0 0		81	sp|Q99985|SEM3C_HUMAN	123	VIQTFJR	6 2 0 0 0
82	sp|P11047|LAMC1_HUMAN	650	LLNJLTSIK	7 2 0 0 0		82	sp|Q99985|SEM3C_HUMAN	123	VIQTFJR	7 2 0 0 0
83	sp|P11047|LAMC1_HUMAN	650	LLNJLTSIK	8 2 0 0 0		83	sp|Q99985|SEM3C_HUMAN	268	ICPJDTGGLR	7 2 0 0 0
84	sp|P11047|LAMC1_HUMAN	1107	VJNTLSSQISR	5 4 0 0 1		84	sp|Q9H5V8|CDCP1_HUMAN	512	QJISVTLR	7 2 0 0 0
85	sp|P11717|MPRI_HUMAN	400	YHJQTLR	5 2 0 0 0		85	sp|Q9H5V8|CDCP1_HUMAN	512	QJISVTLR	8 2 0 0 0
86	sp|P11717|MPRI_HUMAN	1312	MJFTGGDTCHK	7 2 0 0 0		86	sp|Q9NRA1|PDGFC_HUMAN	254	JFSVSIR	8 2 0 0 0
87	sp|P11717|MPRI_HUMAN	1312	MJFTGGDTCHK	8 2 0 0 0		87	sp|Q9UI17|M2GD_HUMAN	799	VVGJTTSGSYSYSIQK	3 5 1 0 1
88	sp|P14210|HGF_HUMAN	653	GKVTLJESEICAGAEK	4 5 0 0 1		[a] Peptide sequence with ‘J’ indicating the N-glycosylation site.
89	sp|P14210|HGF_HUMAN	653	GKVTLJESEICAGAEK	5 4 1 0 1
90	sp|P14210|HGF_HUMAN	653	GKVTLJESEICAGAEK	5 5 0 0 1
91	sp|P19022|CADH2_HUMAN	651	RJWTITR	8 2 0 0 0
92	sp|P19022|CADH2_HUMAN	692	SJISILR	5 2 0 0 0
93	sp|P19022|CADH2_HUMAN/sp|P55283|CADH4_HUMAN	651/661	JWTITR	6 2 0 0 0
94	sp|P19022|CADH2_HUMAN/sp|P55283|CADH4_HUMAN	651/661	JWTITR	7 2 0 0 0
95	sp|P19022|CADH2_HUMAN/sp|P55283|CADH4_HUMAN	651/661	JWTITR	8 2 0 0 0
96	sp|P19022|CADH2_HUMAN/sp|P55283|CADH4_HUMAN	651/661	JWTITR	9 2 0 0 0
97	sp|P20827|EFNA1_HUMAN	26	HTVFWJSSNPK	6 2 0 0 0
98	sp|P23229|ITA6_HUMAN	323	AJHSGAVVLLK	5 2 0 0 0
99	sp|P23229|ITA6_HUMAN	323	AJHSGAVVLLK	5 3 1 0 0
100	sp|P23229|ITA6_HUMAN	323	AJHSGAVVLLK	6 2 0 0 0
101	sp|P23229|ITA6_HUMAN	323	AJHSGAVVLLK	6 3 1 0 0
102	sp|P24821|TENA_HUMAN	1034	JTTSYVLR	4 5 0 0 1
103	sp|P24821|TENA_HUMAN	1034	JTTSYVLR	5 4 0 0 1
104	sp|P24821|TENA_HUMAN	1034	JTTSYVLR	5 4 1 0 1
105	sp|P24821|TENA_HUMAN	1034	JTTSYVLR	5 5 0 0 1
106	sp|P52798|EFNA4_HUMAN	33	HVVYWJSSNPR	6 2 0 0 0
107	sp|P52803|EFNA5_HUMAN	37	YAVYWJSSNPR	6 2 0 0 0
108	sp|P55268|LAMB2_HUMAN	1499	AQAALDKAJASR	5 4 0 0 1
109	sp|P61812|TGFB2_HUMAN	140	JASNLVK	5 2 0 0 0
110	sp|P78536|ADA17_HUMAN	264	JTSWDNAGFK	5 2 0 0 0
111	sp|Q02809|PLOD1_HUMAN	538	YIHQJYTK	5 2 0 0 0
112	sp|Q02809|PLOD1_HUMAN	538	YIHQJYTK	5 4 2 0 1
113	sp|Q02809|PLOD1_HUMAN	538	YIHQJYTK	5 5 0 0 0
114	sp|Q02809|PLOD1_HUMAN	538	YIHQJYTK	5 5 0 0 1
115	sp|Q07954|LRP1_HUMAN	1511	WTGHJVTVVQR	5 4 0 0 1
116	sp|Q08380|LG3BP_HUMAN	551	AAIPSALDTJSSK	5 4 0 0 1
117	sp|Q08380|LG3BP_HUMAN	551	AAIPSALDTJSSK	6 2 0 0 0
118	sp|Q08380|LG3BP_HUMAN	551	AAIPSALDTJSSK	6 3 0 0 0
119	sp|Q08380|LG3BP_HUMAN	551	AAIPSALDTJSSK	6 5 0 0 1
120	sp|Q08380|LG3BP_HUMAN	551	AAIPSALDTJSSK	7 6 0 0 1
121	sp|Q4KMQ2|ANO6_HUMAN	361	LJITCESSK	7 2 0 0 0
122	sp|Q6YHK3|CD109_HUMAN	247	HLJGTITAK	0 2 0 0 0
123	sp|Q6YHK3|CD109_HUMAN	247	HLJGTITAK	1 2 0 0 0
124	sp|Q6YHK3|CD109_HUMAN	247	HLJGTITAK	2 2 0 0 0
125	sp|Q6YHK3|CD109_HUMAN	247	HLJGTITAK	3 2 0 0 0
126	sp|Q6YHK3|CD109_HUMAN	247	HLJGTITAK	4 2 0 0 0
127	sp|Q6YHK3|CD109_HUMAN	247	HLJGTITAK	5 2 0 0 0
128	sp|Q6YHK3|CD109_HUMAN	247	HLJGTITAK	5 3 0 0 0
129	sp|Q6YHK3|CD109_HUMAN	247	HLJGTITAK	5 3 1 0 0
130	sp|Q6YHK3|CD109_HUMAN	247	HLJGTITAK	5 4 0 0 0
131	sp|Q6YHK3|CD109_HUMAN	247	HLJGTITAK	6 2 0 0 0
132	sp|Q6YHK3|CD109_HUMAN	247	HLJGTITAK	6 3 0 0 0
133	sp|Q6YHK3|CD109_HUMAN	247	HLJGTITAK	6 3 1 0 0
134	sp|Q6YHK3|CD109_HUMAN	247	HLJGTITAK	7 2 0 0 0
135	sp|Q6YHK3|CD109_HUMAN	247	HLJGTITAK	8 2 0 0 0
136	sp|Q6YHK3|CD109_HUMAN	337	JVSTNVFFK	5 2 0 0 0
137	sp|Q6YHK3|CD109_HUMAN	337	JVSTNVFFK	7 2 0 0 0
138	sp|Q6YHK3|CD109_HUMAN	337	JVSTNVFFK	8 2 0 0 0
139	sp|Q6YHK3|CD109_HUMAN	337	JVSTNVFFK	9 2 0 0 0
140	sp|Q6ZNF0|ACP7_HUMAN	211	YJFSNYK	6 2 0 0 0
141	sp|Q7Z7M0|MEGF8_HUMAN	421	VJSTELFHVDR	9 2 0 0 0
142	sp|Q8IV08|PLD3_HUMAN	387	DJHTHSDIQVK	3 2 0 0 1
143	sp|Q92673|SORL_HUMAN	1894	SLTTSLHJK	7 2 0 0 0
144	sp|Q92820|GGH_HUMAN	203	JFTMNEK	5 2 0 0 0
145	sp|Q92820|GGH_HUMAN	203	JFTMNEK	6 2 0 0 0
146	sp|Q92823|NRCAM_HUMAN	223	FJHTQTIQQK	4 3 0 0 1
147	sp|Q92823|NRCAM_HUMAN	223	FJHTQTIQQK	5 2 0 0 0
148	sp|Q92823|NRCAM_HUMAN	223	FJHTQTIQQK	5 3 0 0 1
149	sp|Q92823|NRCAM_HUMAN	223	FJHTQTIQQK	5 3 1 0 1
150	sp|Q92823|NRCAM_HUMAN	223	FJHTQTIQQK	5 4 0 0 1
151	sp|Q92823|NRCAM_HUMAN	223	FJHTQTIQQK	6 2 0 0 0
152	sp|Q92823|NRCAM_HUMAN	223	FJHTQTIQQK	7 2 0 0 0
153	sp|Q96AY3|FKB10_HUMAN	70	YHYJGTFEDGK	5 2 0 0 0
154	sp|Q96AY3|FKB10_HUMAN	70	YHYJGTFEDGKK	5 2 0 0 0
155	sp|Q96L93|KI16B_HUMAN	1156	LHJGTIQR	5 3 1 0 0
156	sp|Q99985|SEM3C_HUMAN	123	VIQTFJR	5 2 0 0 0
157	sp|Q99985|SEM3C_HUMAN	123	VIQTFJR	6 2 0 0 0
158	sp|Q99985|SEM3C_HUMAN	123	VIQTFJR	7 2 0 0 0
159	sp|Q99985|SEM3C_HUMAN	268	ICPJDTGGLR	5 2 0 0 0
160	sp|Q99985|SEM3C_HUMAN	268	ICPJDTGGLR	6 2 0 0 0
161	sp|Q99985|SEM3C_HUMAN	268	ICPJDTGGLR	7 2 0 0 0
162	sp|Q99985|SEM3C_HUMAN	268	ICPJDTGGLR	8 2 0 0 0
163	sp|Q99985|SEM3C_HUMAN	585	JJTTFLECAPK	6 2 0 0 0
164	sp|Q99985|SEM3C_HUMAN	585	JJTTFLECAPK	8 2 0 0 0
165	sp|Q9C0C4|SEM4C_HUMAN	419	GTJFTHLVADR	8 2 0 0 0
166	sp|Q9C0C4|SEM4C_HUMAN	419	GTJFTHLVADR	9 2 0 0 0
167	sp|Q9C0C4|SEM4C_HUMAN	419	KGTJFTHLVADR	8 2 0 0 0
168	sp|Q9H5V8|CDCP1_HUMAN	386	TCSSJLTLTSGSK	5 4 0 0 1
169	sp|Q9H5V8|CDCP1_HUMAN	512	QJISVTLR	5 2 0 0 0
170	sp|Q9H5V8|CDCP1_HUMAN	512	QJISVTLR	6 2 0 0 0
171	sp|Q9H5V8|CDCP1_HUMAN	512	QJISVTLR	7 2 0 0 0
172	sp|Q9H5V8|CDCP1_HUMAN	512	QJISVTLR	7 4 1 0 2
173	sp|Q9H5V8|CDCP1_HUMAN	512	QJISVTLR	8 2 0 0 0
174	sp|Q9NRA1|PDGFC_HUMAN	254	JFSVSIR	6 2 0 0 0
175	sp|Q9NRA1|PDGFC_HUMAN	254	JFSVSIR	7 2 0 0 0
176	sp|Q9NRA1|PDGFC_HUMAN	254	JFSVSIR	8 2 0 0 0
177	sp|Q9NRA1|PDGFC_HUMAN	254	JFSVSIR	9 2 0 0 0
178	sp|Q9UHN6|CEIP2_HUMAN	914	NJISLVK	5 2 0 0 0
179	sp|Q9UI17|M2GD_HUMAN	799	VVGJTTSGSYSYSIQK	3 5 1 0 1
180	sp|Q9UI17|M2GD_HUMAN	799	VVGJTTSGSYSYSIQK	3 5 1 0 2
181	sp|Q9UI42|CBPA4_HUMAN	260	NWJASFAGK	6 2 0 0 0
[a] Peptide sequence with ‘J’ indicating the N-glycosylation site.

## Sheet: Table S4
Table S4-1. Intact glycopeptides identified from 25 mg KP4 with Intact GlycoSISPROT under three replicates.						Table S4-2. Intact glycopeptides identified from 25 mg KP4 secretome with traditional method under three replicates.
No	Proteins	ProSites	Amino acid sequence	Glycan composition (Glycan(H,N,A,G,F)		No	Proteins	ProSites	Amino acid sequence	Glycan composition (Glycan(H,N,A,G,F)
1	sp|O00115|DNS2A_HUMAN	212	GHHVSQEPWJSSITLTSQAGAVFQSFAK	5 3 1 0 0		1	sp|O00391|QSOX1_HUMAN	130	JGSGAVFPVAGADVQTLR	3 6 0 0 2
2	sp|O00115|DNS2A_HUMAN	212	GHHVSQEPWJSSITLTSQAGAVFQSFAK	5 4 2 0 0		2	sp|O00391|QSOX1_HUMAN	130	JGSGAVFPVAGADVQTLR	3 6 0 0 3
3	sp|O00115|DNS2A_HUMAN	212	GHHVSQEPWJSSITLTSQAGAVFQSFAK	6 2 0 0 0		3	sp|O00391|QSOX1_HUMAN	130	JGSGAVFPVAGADVQTLR	4 5 0 0 1
4	sp|O00391|QSOX1_HUMAN	130	JGSGAVFPVAGADVQTLR	4 5 0 0 2		4	sp|O00391|QSOX1_HUMAN	130	JGSGAVFPVAGADVQTLR	4 5 1 0 1
5	sp|O00391|QSOX1_HUMAN	130	JGSGAVFPVAGADVQTLR	4 5 1 0 1		5	sp|O00391|QSOX1_HUMAN	130	JGSGAVFPVAGADVQTLR	4 5 1 0 2
6	sp|O00391|QSOX1_HUMAN	130	JGSGAVFPVAGADVQTLR	4 5 1 0 2		6	sp|O00391|QSOX1_HUMAN	130	JGSGAVFPVAGADVQTLR	4 5 2 0 1
7	sp|O00391|QSOX1_HUMAN	130	JGSGAVFPVAGADVQTLR	4 5 2 0 0		7	sp|O00391|QSOX1_HUMAN	130	JGSGAVFPVAGADVQTLR	5 4 1 0 1
8	sp|O00391|QSOX1_HUMAN	130	JGSGAVFPVAGADVQTLR	4 5 2 0 1		8	sp|O00391|QSOX1_HUMAN	130	JGSGAVFPVAGADVQTLR	5 4 1 0 2
9	sp|O00391|QSOX1_HUMAN	130	JGSGAVFPVAGADVQTLR	5 4 1 0 1		9	sp|O00391|QSOX1_HUMAN	130	JGSGAVFPVAGADVQTLR	5 4 2 0 1
10	sp|O00391|QSOX1_HUMAN	130	JGSGAVFPVAGADVQTLR	5 4 1 0 2		10	sp|O00391|QSOX1_HUMAN	130	JGSGAVFPVAGADVQTLR	5 5 0 0 1
11	sp|O00391|QSOX1_HUMAN	130	JGSGAVFPVAGADVQTLR	5 4 2 0 1		11	sp|O00391|QSOX1_HUMAN	130	JGSGAVFPVAGADVQTLR	5 5 1 0 1
12	sp|O00391|QSOX1_HUMAN	130	JGSGAVFPVAGADVQTLR	5 5 1 0 1		12	sp|O00391|QSOX1_HUMAN	130	JGSGAVFPVAGADVQTLR	5 5 2 0 1
13	sp|O00391|QSOX1_HUMAN/sp|Q5DX21|IGS11_HUMAN	243/389	JGSVSR	5 4 0 0 2		13	sp|O00391|QSOX1_HUMAN/sp|Q5DX21|IGS11_HUMAN	243/389	JGSVSR	4 5 1 0 1
14	sp|O00391|QSOX1_HUMAN/sp|Q5DX21|IGS11_HUMAN	243/389	JGSVSR	5 4 1 0 1		14	sp|O00391|QSOX1_HUMAN/sp|Q5DX21|IGS11_HUMAN	243/389	JGSVSR	5 4 1 0 1
15	sp|O00468|AGRIN_HUMAN	135	IFFVNPAPPYLWPAHKNELMLJSSLMR	5 4 1 0 0		15	sp|O00462|MANBA_HUMAN	77	WVSLDJWTYSK	5 3 1 0 0
16	sp|O00468|AGRIN_HUMAN	135	NELMLJSSLMR	5 4 0 0 0		16	sp|O00462|MANBA_HUMAN	77	WVSLDJWTYSK	5 4 1 0 0
17	sp|O00468|AGRIN_HUMAN	135	NELMLJSSLMR	5 4 1 0 0		17	sp|O00468|AGRIN_HUMAN	135	NELMLJSSLMR	5 4 1 0 0
18	sp|O00468|AGRIN_HUMAN	135	NELMLJSSLMR	5 4 2 0 0		18	sp|O00468|AGRIN_HUMAN	250	DPCSJVTCSFGSTCAR	5 4 0 0 2
19	sp|O00468|AGRIN_HUMAN	135	NELMLJSSLMR	6 2 0 0 0		19	sp|O00468|AGRIN_HUMAN	250	DPCSJVTCSFGSTCAR	5 4 1 0 2
20	sp|O00468|AGRIN_HUMAN	250	DPCSJVTCSFGSTCAR	5 4 0 0 2		20	sp|O00754|MA2B1_HUMAN	367	AJLTWSVK	5 2 0 0 0
21	sp|O00468|AGRIN_HUMAN	250	DPCSJVTCSFGSTCAR	5 4 1 0 2		21	sp|O00754|MA2B1_HUMAN	930	JLSAPVTLNLR	5 2 0 0 0
22	sp|O00468|AGRIN_HUMAN	250	DPCSJVTCSFGSTCAR	5 4 2 0 2		22	sp|O14672|ADA10_HUMAN	267	JISFMVK	5 2 0 0 0
23	sp|O00468|AGRIN_HUMAN	250	DPCSJVTCSFGSTCAR	5 5 0 0 2		23	sp|O14672|ADA10_HUMAN	278	IJTTADEKDPTNPFR	5 2 0 0 0
24	sp|O00468|AGRIN_HUMAN	250	DPCSJVTCSFGSTCAR	6 5 0 0 2		24	sp|O14672|ADA10_HUMAN	278	IJTTADEKDPTNPFR	9 2 0 0 0
25	sp|O00468|AGRIN_HUMAN	932	CVEESGSAHCVCPMLTCPEAJATK	5 4 1 0 1		25	sp|O14672|ADA10_HUMAN	439	JISQVLEK	5 2 0 0 0
26	sp|O00468|AGRIN_HUMAN	932	CVEESGSAHCVCPMLTCPEAJATK	5 5 0 0 1		26	sp|O14672|ADA10_HUMAN	439	JISQVLEK	6 2 0 0 0
27	sp|O00469|PLOD2_HUMAN	209	EAIJITLDHK	5 4 2 0 0		27	sp|O14672|ADA10_HUMAN	439	JISQVLEK	7 2 0 0 0
28	sp|O14672|ADA10_HUMAN	278	IJTTADEKDPTNPFR	5 2 0 0 0		28	sp|O14672|ADA10_HUMAN	439	JISQVLEK	8 2 0 0 0
29	sp|O14672|ADA10_HUMAN	278	IJTTADEKDPTNPFR	8 2 0 0 0		29	sp|O15031|PLXB2_HUMAN	1002	SIJVTGQGFSLIQR	5 2 0 0 0
30	sp|O14672|ADA10_HUMAN	439	JISQVLEK	5 2 0 0 0		30	sp|O15041|SEM3E_HUMAN	126	VLHHYJR	3 2 0 0 0
31	sp|O14672|ADA10_HUMAN	439	JISQVLEK	6 2 0 0 0		31	sp|O15041|SEM3E_HUMAN	126	VLHHYJR	4 2 0 0 0
32	sp|O14672|ADA10_HUMAN	439	JISQVLEK	7 2 0 0 0		32	sp|O15041|SEM3E_HUMAN	126	VLHHYJR	5 2 0 0 0
33	sp|O14773|TPP1_HUMAN	443	FLSSSPHLPPSSYFJASGR	5 4 2 0 0		33	sp|O15041|SEM3E_HUMAN	126	VLHHYJR	5 4 0 0 0
34	sp|O14773|TPP1_HUMAN	443	FLSSSPHLPPSSYFJASGR	5 4 2 0 1		34	sp|O15041|SEM3E_HUMAN	126	VLHHYJR	6 2 0 0 0
35	sp|O14786|NRP1_HUMAN	150	RGPECSQJYTTPSGVIK	5 4 1 0 1		35	sp|O15041|SEM3E_HUMAN	126	VLHHYJR	6 3 1 0 0
36	sp|O15031|PLXB2_HUMAN	528	SCVAVTSAQPQJMSR	5 4 2 0 0		36	sp|O15041|SEM3E_HUMAN	126	VLHHYJR	7 2 0 0 0
37	sp|O15031|PLXB2_HUMAN	733	LSHDAJETLPLHLYVK	5 4 1 0 1		37	sp|O15041|SEM3E_HUMAN	330	DHKNPVIFGLFJTTSNIFR	8 2 0 0 0
38	sp|O15031|PLXB2_HUMAN	733	LSHDAJETLPLHLYVK	5 4 2 0 1		38	sp|O15230|LAMA5_HUMAN	95	LVGGPVAGGDPJQTIR	5 2 0 0 0
39	sp|O15031|PLXB2_HUMAN	1049	EAESLQPMTVVGTDYVFHJDTK	5 4 1 0 1		39	sp|O15230|LAMA5_HUMAN	95	LVGGPVAGGDPJQTIR	6 2 0 0 0
40	sp|O15041|SEM3E_HUMAN	126	VLHHYJR	2 2 0 0 0		40	sp|O15230|LAMA5_HUMAN	95	LVGGPVAGGDPJQTIR	7 2 0 0 0
41	sp|O15041|SEM3E_HUMAN	126	VLHHYJR	4 2 0 0 0		41	sp|O15230|LAMA5_HUMAN	95	LVGGPVAGGDPJQTIR	8 2 0 0 0
42	sp|O15041|SEM3E_HUMAN	126	VLHHYJR	4 4 0 0 1		42	sp|O15230|LAMA5_HUMAN	243	PGAMJFSYSPLLR	5 4 0 0 1
43	sp|O15041|SEM3E_HUMAN	126	VLHHYJR	5 2 0 0 0		43	sp|O15230|LAMA5_HUMAN	1330	VWQGHAJASFCPHGYGCR	9 2 0 0 0
44	sp|O15041|SEM3E_HUMAN	126	VLHHYJR	6 2 0 0 0		44	sp|O15230|LAMA5_HUMAN	2019	CEICAPGFYGNALLPGJCTR	5 5 0 0 1
45	sp|O15041|SEM3E_HUMAN	126	VLHHYJR	6 3 1 0 0		45	sp|O15230|LAMA5_HUMAN	2209	LJASIADLQSQLR	5 4 0 0 1
46	sp|O15041|SEM3E_HUMAN	126	VLHHYJR	7 2 0 0 0		46	sp|O15230|LAMA5_HUMAN	2209	LJASIADLQSQLR	5 4 1 0 1
47	sp|O15041|SEM3E_HUMAN	330	DHKNPVIFGLFJTTSNIFR	6 2 0 0 0		47	sp|O15230|LAMA5_HUMAN	2209	LJASIADLQSQLR	5 5 0 0 1
48	sp|O15041|SEM3E_HUMAN	330	DHKNPVIFGLFJTTSNIFR	7 2 0 0 0		48	sp|O15230|LAMA5_HUMAN	2423	DJATLQATLHAAR	4 5 0 0 1
49	sp|O15041|SEM3E_HUMAN	330	DHKNPVIFGLFJTTSNIFR	8 2 0 0 0		49	sp|O15230|LAMA5_HUMAN	2423	DJATLQATLHAAR	5 4 0 0 1
50	sp|O15041|SEM3E_HUMAN	330	NPVIFGLFJTTSNIFR	6 2 0 0 0		50	sp|O43556|SGCE_HUMAN	200	LNAIJITSALDR	5 2 0 0 0
51	sp|O15041|SEM3E_HUMAN	330	NPVIFGLFJTTSNIFR	8 2 0 0 0		51	sp|O43556|SGCE_HUMAN	200	LNAIJITSALDR	5 3 1 0 0
52	sp|O15230|LAMA5_HUMAN	95	LVGGPVAGGDPJQTIR	5 2 0 0 0		52	sp|O43556|SGCE_HUMAN	200	LNAIJITSALDR	6 2 0 0 0
53	sp|O15230|LAMA5_HUMAN	95	LVGGPVAGGDPJQTIR	6 2 0 0 0		53	sp|O43556|SGCE_HUMAN	200	LNAIJITSALDR	6 3 1 0 0
54	sp|O15230|LAMA5_HUMAN	95	LVGGPVAGGDPJQTIR	7 2 0 0 0		54	sp|O43556|SGCE_HUMAN	200	LNAIJITSALDR	7 2 0 0 0
55	sp|O15230|LAMA5_HUMAN	95	LVGGPVAGGDPJQTIR	8 2 0 0 0		55	sp|O43556|SGCE_HUMAN	200	LNAIJITSALDR	8 2 0 0 0
56	sp|O15230|LAMA5_HUMAN	243	PGAMJFSYSPLLR	5 4 0 0 1		56	sp|O43921|EFNA2_HUMAN	42	YAVYWJR	6 2 0 0 0
57	sp|O15230|LAMA5_HUMAN	243	PGAMJFSYSPLLR	5 4 1 0 1		57	sp|O43921|EFNA2_HUMAN	42	YAVYWJR	7 2 0 0 0
58	sp|O15230|LAMA5_HUMAN	243	PGAMJFSYSPLLR	5 5 0 0 1		58	sp|O60279|SUSD5_HUMAN	354	VIYGNTDGPSGPFVGKJDSK	5 4 2 0 1
59	sp|O15230|LAMA5_HUMAN	1330	VWQGHAJASFCPHGYGCR	8 2 0 0 0		59	sp|O60568|PLOD3_HUMAN	63	SAEFFJYTVR	5 4 2 0 1
60	sp|O15230|LAMA5_HUMAN	1330	VWQGHAJASFCPHGYGCR	9 2 0 0 0		60	sp|O60568|PLOD3_HUMAN	548	EQYIHEJYSR	5 2 0 0 0
61	sp|O15230|LAMA5_HUMAN	2019	CEICAPGFYGNALLPGJCTR	5 5 0 0 1		61	sp|O60568|PLOD3_HUMAN	548	EQYIHEJYSR	5 4 2 0 1
62	sp|O15230|LAMA5_HUMAN	3107	LJTTGVSAGCTADLLVGR	5 2 0 0 0		62	sp|O60568|PLOD3_HUMAN	548	EQYIHEJYSR	5 4 3 0 1
63	sp|O15230|LAMA5_HUMAN	3107	RLJTTGVSAGCTADLLVGR	5 2 0 0 0		63	sp|O60911|CATL2_HUMAN	221	YRPENSVAJDTGFTVVAPGK	3 6 0 0 3
64	sp|O43556|SGCE_HUMAN	200	LNAIJITSALDR	5 3 1 0 0		64	sp|O60911|CATL2_HUMAN	221	YRPENSVAJDTGFTVVAPGK	4 5 1 0 1
65	sp|O43556|SGCE_HUMAN	200	LNAIJITSALDR	6 2 0 0 0		65	sp|O60911|CATL2_HUMAN	221	YRPENSVAJDTGFTVVAPGK	4 5 1 0 2
66	sp|O43556|SGCE_HUMAN	200	LNAIJITSALDR	6 3 1 0 0		66	sp|O60911|CATL2_HUMAN	221	YRPENSVAJDTGFTVVAPGK	4 5 2 0 1
67	sp|O43556|SGCE_HUMAN	200	LNAIJITSALDR	8 2 0 0 0		67	sp|O60911|CATL2_HUMAN	292	NLDHGVLVVGYGFEGANSJNSK	3 6 0 0 2
68	sp|O43921|EFNA2_HUMAN	42	YAVYWJR	6 2 0 0 0		68	sp|O60911|CATL2_HUMAN	292	NLDHGVLVVGYGFEGANSJNSK	3 6 0 0 3
69	sp|O43921|EFNA2_HUMAN	42	YAVYWJR	7 2 0 0 0		69	sp|O60911|CATL2_HUMAN	292	NLDHGVLVVGYGFEGANSJNSK	4 5 1 0 2
70	sp|O60279|SUSD5_HUMAN	354	VIYGNTDGPSGPFVGKJDSK	5 4 2 0 1		70	sp|O60911|CATL2_HUMAN	292	NLDHGVLVVGYGFEGANSJNSK	5 4 2 0 1
71	sp|O60568|PLOD3_HUMAN	63	SAEFFJYTVR	5 4 2 0 1		71	sp|O75493|CAH11_HUMAN	118	PVVJVSGGPLLYSHR	3 6 0 0 1
72	sp|O60568|PLOD3_HUMAN	548	EQYIHEJYSR	6 5 3 0 1		72	sp|O75493|CAH11_HUMAN	118	PVVJVSGGPLLYSHR	4 4 0 0 1
73	sp|O60911|CATL2_HUMAN	221	YRPENSVAJDTGFTVVAPGK	3 6 0 0 1		73	sp|O75493|CAH11_HUMAN	118	PVVJVSGGPLLYSHR	4 4 1 0 0
74	sp|O60911|CATL2_HUMAN	221	YRPENSVAJDTGFTVVAPGK	3 6 0 0 2		74	sp|O75493|CAH11_HUMAN	118	PVVJVSGGPLLYSHR	4 5 0 0 0
75	sp|O60911|CATL2_HUMAN	221	YRPENSVAJDTGFTVVAPGK	3 6 0 0 3		75	sp|O75493|CAH11_HUMAN	118	PVVJVSGGPLLYSHR	4 5 0 0 1
76	sp|O60911|CATL2_HUMAN	221	YRPENSVAJDTGFTVVAPGK	4 5 0 0 2		76	sp|O75493|CAH11_HUMAN	118	PVVJVSGGPLLYSHR	4 5 1 0 0
77	sp|O60911|CATL2_HUMAN	221	YRPENSVAJDTGFTVVAPGK	4 5 1 0 1		77	sp|O75493|CAH11_HUMAN	118	PVVJVSGGPLLYSHR	4 5 1 0 1
78	sp|O60911|CATL2_HUMAN	221	YRPENSVAJDTGFTVVAPGK	4 5 1 0 2		78	sp|O75493|CAH11_HUMAN	118	PVVJVSGGPLLYSHR	5 4 0 0 1
79	sp|O60911|CATL2_HUMAN	221	YRPENSVAJDTGFTVVAPGK	4 5 2 0 0		79	sp|O75764|TCEA3_HUMAN	317	KKJCTYNQVQTR	5 2 0 0 0
80	sp|O60911|CATL2_HUMAN	221	YRPENSVAJDTGFTVVAPGK	4 5 2 0 1		80	sp|O75882|ATRN_HUMAN	416	IDSTGJVTNELR	5 2 0 0 0
81	sp|O60911|CATL2_HUMAN	221	YRPENSVAJDTGFTVVAPGK	5 4 2 0 1		81	sp|O75882|ATRN_HUMAN	416	IDSTGJVTNELR	6 2 0 0 0
82	sp|O60911|CATL2_HUMAN	221	YRPENSVAJDTGFTVVAPGK	9 2 0 0 0		82	sp|O75882|ATRN_HUMAN	416	IDSTGJVTNELR	7 2 0 0 0
83	sp|O60911|CATL2_HUMAN	221	YRPENSVAJDTGFTVVAPGK	9 2 0 0 1		83	sp|O75882|ATRN_HUMAN	416	IDSTGJVTNELR	8 2 0 0 0
84	sp|O60911|CATL2_HUMAN	221	YRPENSVAJDTGFTVVAPGK	9 3 0 0 0		84	sp|O75882|ATRN_HUMAN	416	IDSTGJVTNELR	9 2 0 0 0
85	sp|O60911|CATL2_HUMAN	221	YRPENSVAJDTGFTVVAPGKEK	4 5 1 0 2		85	sp|O75882|ATRN_HUMAN	428	VFHIHJESWVLLTPK	6 2 0 0 0
86	sp|O60911|CATL2_HUMAN	292	NLDHGVLVVGYGFEGANSJNSK	3 4 0 0 1		86	sp|O75882|ATRN_HUMAN	428	VFHIHJESWVLLTPK	7 2 0 0 0
87	sp|O60911|CATL2_HUMAN	292	NLDHGVLVVGYGFEGANSJNSK	3 4 0 0 2		87	sp|O75882|ATRN_HUMAN	1073	CIJQSICEK	5 4 2 0 1
88	sp|O60911|CATL2_HUMAN	292	NLDHGVLVVGYGFEGANSJNSK	3 5 0 0 1		88	sp|O75882|ATRN_HUMAN	1082	CEJLTTGK	5 2 0 0 0
89	sp|O60911|CATL2_HUMAN	292	NLDHGVLVVGYGFEGANSJNSK	3 5 0 0 2		89	sp|O75882|ATRN_HUMAN	1082	CEJLTTGK	5 5 0 0 1
90	sp|O60911|CATL2_HUMAN	292	NLDHGVLVVGYGFEGANSJNSK	3 5 1 0 1		90	sp|O94813|SLIT2_HUMAN	623	ITCVGJDSFIGLSSVR	4 5 0 0 1
91	sp|O60911|CATL2_HUMAN	292	NLDHGVLVVGYGFEGANSJNSK	3 6 0 0 1		91	sp|O94813|SLIT2_HUMAN	623	ITCVGJDSFIGLSSVR	4 5 1 0 1
92	sp|O60911|CATL2_HUMAN	292	NLDHGVLVVGYGFEGANSJNSK	3 6 0 0 2		92	sp|O94813|SLIT2_HUMAN	623	ITCVGJDSFIGLSSVR	7 6 3 0 1
93	sp|O60911|CATL2_HUMAN	292	NLDHGVLVVGYGFEGANSJNSK	3 6 0 0 3		93	sp|O94898|LRIG2_HUMAN	173	YLJLSNNR	9 2 0 0 0
94	sp|O60911|CATL2_HUMAN	292	NLDHGVLVVGYGFEGANSJNSK	4 4 0 0 2		94	sp|O94907|DKK1_HUMAN	256	DHHQASJSSR	4 5 2 0 1
95	sp|O60911|CATL2_HUMAN	292	NLDHGVLVVGYGFEGANSJNSK	4 4 1 0 1		95	sp|O94907|DKK1_HUMAN	256	DHHQASJSSR	5 4 2 0 1
96	sp|O60911|CATL2_HUMAN	292	NLDHGVLVVGYGFEGANSJNSK	4 5 0 0 2		96	sp|O94907|DKK1_HUMAN	256	DHHQASJSSR	5 5 2 0 1
97	sp|O60911|CATL2_HUMAN	292	NLDHGVLVVGYGFEGANSJNSK	4 5 0 0 3		97	sp|O95025|SEM3D_HUMAN	139	VLQPYJK	6 2 0 0 0
98	sp|O60911|CATL2_HUMAN	292	NLDHGVLVVGYGFEGANSJNSK	4 5 1 0 1		98	sp|O95084|PRS23_HUMAN	93	QYLSYETLYAJGSR	3 4 0 0 1
99	sp|O60911|CATL2_HUMAN	292	NLDHGVLVVGYGFEGANSJNSK	4 5 1 0 2		99	sp|O95084|PRS23_HUMAN	93	QYLSYETLYAJGSR	3 4 0 0 2
100	sp|O60911|CATL2_HUMAN	292	NLDHGVLVVGYGFEGANSJNSK	4 5 2 0 1		100	sp|O95084|PRS23_HUMAN	93	QYLSYETLYAJGSR	3 4 1 0 0
101	sp|O60911|CATL2_HUMAN	292	NLDHGVLVVGYGFEGANSJNSK	5 4 1 0 1		101	sp|O95084|PRS23_HUMAN	93	QYLSYETLYAJGSR	3 4 1 0 1
102	sp|O60911|CATL2_HUMAN	292	NLDHGVLVVGYGFEGANSJNSK	5 4 2 0 1		102	sp|O95084|PRS23_HUMAN	93	QYLSYETLYAJGSR	4 4 0 0 0
103	sp|O60911|CATL2_HUMAN	292	NLDHGVLVVGYGFEGANSJNSK	6 4 0 0 1		103	sp|O95084|PRS23_HUMAN	93	QYLSYETLYAJGSR	4 4 0 0 1
104	sp|O60911|CATL2_HUMAN	292	NLDHGVLVVGYGFEGANSJNSK	6 4 1 0 1		104	sp|O95084|PRS23_HUMAN	93	QYLSYETLYAJGSR	4 4 0 0 2
105	sp|O60911|CATL2_HUMAN	292	NLDHGVLVVGYGFEGANSJNSK	9 2 0 0 0		105	sp|O95084|PRS23_HUMAN	93	QYLSYETLYAJGSR	4 4 1 0 0
106	sp|O60911|CATL2_HUMAN	292	NLDHGVLVVGYGFEGANSJNSK	9 2 0 0 1		106	sp|O95084|PRS23_HUMAN	93	QYLSYETLYAJGSR	4 5 1 0 1
107	sp|O75326|SEM7A_HUMAN	258	EDNPDKNPEAPLJVSR	5 2 0 0 0		107	sp|O95084|PRS23_HUMAN	93	QYLSYETLYAJGSR	5 4 0 0 0
108	sp|O75326|SEM7A_HUMAN	258	EDNPDKNPEAPLJVSR	7 2 0 0 0		108	sp|O95084|PRS23_HUMAN	93	QYLSYETLYAJGSR	5 4 0 0 1
109	sp|O75493|CAH11_HUMAN	118	PVVJVSGGPLLYSHR	3 6 0 0 0		109	sp|O95084|PRS23_HUMAN	93	QYLSYETLYAJGSR	5 4 1 0 0
110	sp|O75493|CAH11_HUMAN	118	PVVJVSGGPLLYSHR	3 6 0 0 1		110	sp|O95084|PRS23_HUMAN	93	QYLSYETLYAJGSR	7 2 0 0 0
111	sp|O75493|CAH11_HUMAN	118	PVVJVSGGPLLYSHR	4 4 0 0 1		111	sp|O95084|PRS23_HUMAN	93	QYLSYETLYAJGSR	8 2 0 0 0
112	sp|O75493|CAH11_HUMAN	118	PVVJVSGGPLLYSHR	4 5 0 0 0		112	sp|O95302|FKBP9_HUMAN	174	YHYJGTFLDGTLFDSSHNR	5 2 0 0 0
113	sp|O75493|CAH11_HUMAN	118	PVVJVSGGPLLYSHR	4 5 0 0 1		113	sp|O95490|AGRL2_HUMAN	731	SLGQFLSTEJATIK	5 2 0 0 0
114	sp|O75493|CAH11_HUMAN	118	PVVJVSGGPLLYSHR	4 5 1 0 0		114	sp|O95490|AGRL2_HUMAN	813	LVDTJK	8 7 0 0 0
115	sp|O75493|CAH11_HUMAN	118	PVVJVSGGPLLYSHR	4 5 1 0 1		115	sp|O95631|NET1_HUMAN	95	SCHLCJASDPK	5 4 1 0 0
116	sp|O75493|CAH11_HUMAN	118	PVVJVSGGPLLYSHR	5 4 0 0 1		116	sp|P00533|EGFR_HUMAN	352	DSLSIJATNIK	5 2 0 0 0
117	sp|O75635|SPB7_HUMAN	215	KFJLSVIEDPSMK	6 2 0 0 0		117	sp|P00533|EGFR_HUMAN	352	DSLSIJATNIK	6 2 0 0 0
118	sp|O75882|ATRN_HUMAN	416	IDSTGJVTNELR	5 2 0 0 0		118	sp|P00533|EGFR_HUMAN	352	DSLSIJATNIK	7 2 0 0 0
119	sp|O75882|ATRN_HUMAN	416	IDSTGJVTNELR	6 2 0 0 0		119	sp|P00749|UROK_HUMAN	322	EJSTDYLYPEQLK	4 5 1 0 1
120	sp|O75882|ATRN_HUMAN	416	IDSTGJVTNELR	7 2 0 0 0		120	sp|P00749|UROK_HUMAN	322	EJSTDYLYPEQLK	4 5 2 0 1
121	sp|O75882|ATRN_HUMAN	416	IDSTGJVTNELR	8 2 0 0 0		121	sp|P00749|UROK_HUMAN	322	EJSTDYLYPEQLK	5 4 2 0 1
122	sp|O75882|ATRN_HUMAN	428	VFHIHJESWVLLTPK	5 2 0 0 0		122	sp|P01009|A1AT_HUMAN	271	YLGJATAIFFLPDEGK	5 4 1 0 1
123	sp|O75882|ATRN_HUMAN	428	VFHIHJESWVLLTPK	6 2 0 0 0		123	sp|P01009|A1AT_HUMAN	271	YLGJATAIFFLPDEGK	5 4 2 0 1
124	sp|O75882|ATRN_HUMAN	428	VFHIHJESWVLLTPK	6 3 0 0 0		124	sp|P01033|TIMP1_HUMAN	53	FVGTPEVJQTTLYQR	3 4 0 0 1
125	sp|O75882|ATRN_HUMAN	428	VFHIHJESWVLLTPK	7 2 0 0 0		125	sp|P01033|TIMP1_HUMAN	53	FVGTPEVJQTTLYQR	3 4 0 0 2
126	sp|O75882|ATRN_HUMAN	428	VFHIHJESWVLLTPK	8 2 0 0 0		126	sp|P01033|TIMP1_HUMAN	53	FVGTPEVJQTTLYQR	3 4 1 0 1
127	sp|O94813|SLIT2_HUMAN	1300	QAPGQJGTSFHGCIR	5 4 1 0 1		127	sp|P01033|TIMP1_HUMAN	53	FVGTPEVJQTTLYQR	3 5 0 0 1
128	sp|O94813|SLIT2_HUMAN	1300	QAPGQJGTSFHGCIR	5 4 2 0 1		128	sp|P01033|TIMP1_HUMAN	53	FVGTPEVJQTTLYQR	3 5 1 0 1
129	sp|O94907|DKK1_HUMAN	256	DHHQASJSSR	3 6 0 0 1		129	sp|P01033|TIMP1_HUMAN	53	FVGTPEVJQTTLYQR	3 6 0 0 1
130	sp|O94907|DKK1_HUMAN	256	DHHQASJSSR	3 6 0 0 2		130	sp|P01033|TIMP1_HUMAN	53	FVGTPEVJQTTLYQR	3 6 0 0 2
131	sp|O94907|DKK1_HUMAN	256	DHHQASJSSR	3 6 0 0 3		131	sp|P01033|TIMP1_HUMAN	53	FVGTPEVJQTTLYQR	3 6 0 0 3
132	sp|O94907|DKK1_HUMAN	256	DHHQASJSSR	4 5 0 0 2		132	sp|P01033|TIMP1_HUMAN	53	FVGTPEVJQTTLYQR	4 3 1 0 1
133	sp|O94907|DKK1_HUMAN	256	DHHQASJSSR	4 5 0 0 3		133	sp|P01033|TIMP1_HUMAN	53	FVGTPEVJQTTLYQR	4 4 0 0 1
134	sp|O94907|DKK1_HUMAN	256	DHHQASJSSR	4 5 1 0 1		134	sp|P01033|TIMP1_HUMAN	53	FVGTPEVJQTTLYQR	4 4 1 0 1
135	sp|O94907|DKK1_HUMAN	256	DHHQASJSSR	4 5 1 0 2		135	sp|P01033|TIMP1_HUMAN	53	FVGTPEVJQTTLYQR	4 4 2 0 2
136	sp|O94907|DKK1_HUMAN	256	DHHQASJSSR	4 5 2 0 1		136	sp|P01033|TIMP1_HUMAN	53	FVGTPEVJQTTLYQR	4 5 0 0 1
137	sp|O94907|DKK1_HUMAN	256	DHHQASJSSR	5 4 1 0 1		137	sp|P01033|TIMP1_HUMAN	53	FVGTPEVJQTTLYQR	4 5 0 0 2
138	sp|O94907|DKK1_HUMAN	256	DHHQASJSSR	5 4 1 0 2		138	sp|P01033|TIMP1_HUMAN	53	FVGTPEVJQTTLYQR	4 5 0 0 3
139	sp|O94907|DKK1_HUMAN	256	DHHQASJSSR	5 4 2 0 1		139	sp|P01033|TIMP1_HUMAN	53	FVGTPEVJQTTLYQR	4 5 1 0 0
140	sp|O94907|DKK1_HUMAN	256	DHHQASJSSR	5 4 3 0 1		140	sp|P01033|TIMP1_HUMAN	53	FVGTPEVJQTTLYQR	4 5 1 0 1
141	sp|O94907|DKK1_HUMAN	256	IQKDHHQASJSSR	4 5 2 0 1		141	sp|P01033|TIMP1_HUMAN	53	FVGTPEVJQTTLYQR	4 5 1 0 2
142	sp|O94907|DKK1_HUMAN	256	IQKDHHQASJSSR	5 4 2 0 1		142	sp|P01033|TIMP1_HUMAN	53	FVGTPEVJQTTLYQR	4 5 1 1 1
143	sp|O95084|PRS23_HUMAN	93	QYLSYETLYAJGSR	3 4 0 0 2		143	sp|P01033|TIMP1_HUMAN	53	FVGTPEVJQTTLYQR	4 5 2 0 1
144	sp|O95084|PRS23_HUMAN	93	QYLSYETLYAJGSR	3 4 1 0 0		144	sp|P01033|TIMP1_HUMAN	53	FVGTPEVJQTTLYQR	4 5 2 0 2
145	sp|O95084|PRS23_HUMAN	93	QYLSYETLYAJGSR	3 4 1 0 1		145	sp|P01033|TIMP1_HUMAN	53	FVGTPEVJQTTLYQR	4 6 0 0 0
146	sp|O95084|PRS23_HUMAN	93	QYLSYETLYAJGSR	4 5 0 0 1		146	sp|P01033|TIMP1_HUMAN	53	FVGTPEVJQTTLYQR	4 6 0 0 1
147	sp|O95084|PRS23_HUMAN	93	QYLSYETLYAJGSR	5 4 0 0 1		147	sp|P01033|TIMP1_HUMAN	53	FVGTPEVJQTTLYQR	4 6 0 0 2
148	sp|O95084|PRS23_HUMAN	93	QYLSYETLYAJGSR	7 2 0 0 0		148	sp|P01033|TIMP1_HUMAN	53	FVGTPEVJQTTLYQR	4 6 1 0 0
149	sp|O95084|PRS23_HUMAN	93	QYLSYETLYAJGSR	8 2 0 0 0		149	sp|P01033|TIMP1_HUMAN	53	FVGTPEVJQTTLYQR	4 6 1 0 1
150	sp|O95084|PRS23_HUMAN	207	GAJDSTSAMPEQMK	3 6 0 0 2		150	sp|P01033|TIMP1_HUMAN	53	FVGTPEVJQTTLYQR	4 7 0 0 1
151	sp|O95302|FKBP9_HUMAN	174	YHYJGTFLDGTLFDSSHNR	5 2 0 0 0		151	sp|P01033|TIMP1_HUMAN	53	FVGTPEVJQTTLYQR	4 7 1 0 1
152	sp|O95631|NET1_HUMAN	95	SCHLCJASDPK	5 4 1 0 0		152	sp|P01033|TIMP1_HUMAN	53	FVGTPEVJQTTLYQR	4 7 2 0 0
154	sp|O95631|NET1_HUMAN	95	SCHLCJASDPK	5 4 2 0 0		154	sp|P01033|TIMP1_HUMAN	53	FVGTPEVJQTTLYQR	4 7 2 0 1
156	sp|O95633|FSTL3_HUMAN	73	AECCASGNIDTAWSJLTHPGNK	4 5 1 0 1		156	sp|P01033|TIMP1_HUMAN	53	FVGTPEVJQTTLYQR	5 2 0 0 0
153	sp|O95633|FSTL3_HUMAN	73	AECCASGNIDTAWSJLTHPGNK	4 5 2 0 1		153	sp|P01033|TIMP1_HUMAN	53	FVGTPEVJQTTLYQR	5 4 0 0 1
155	sp|O95633|FSTL3_HUMAN	73	AECCASGNIDTAWSJLTHPGNK	5 4 2 0 1		155	sp|P01033|TIMP1_HUMAN	53	FVGTPEVJQTTLYQR	5 4 1 0 0
157	sp|O95633|FSTL3_HUMAN	73	AECCASGNIDTAWSJLTHPGNK	5 5 2 0 1		157	sp|P01033|TIMP1_HUMAN	53	FVGTPEVJQTTLYQR	5 4 1 0 1
158	sp|P00533|EGFR_HUMAN	352	DSLSIJATNIK	11 9 0 0 0		158	sp|P01033|TIMP1_HUMAN	53	FVGTPEVJQTTLYQR	5 4 1 0 2
159	sp|P00533|EGFR_HUMAN	352	DSLSIJATNIK	5 2 0 0 0		159	sp|P01033|TIMP1_HUMAN	53	FVGTPEVJQTTLYQR	5 4 1 1 1
160	sp|P00533|EGFR_HUMAN	352	DSLSIJATNIK	6 2 0 0 0		160	sp|P01033|TIMP1_HUMAN	53	FVGTPEVJQTTLYQR	5 4 2 0 0
161	sp|P00533|EGFR_HUMAN	352	DSLSIJATNIK	8 2 0 0 0		161	sp|P01033|TIMP1_HUMAN	53	FVGTPEVJQTTLYQR	5 4 2 0 1
162	sp|P00533|EGFR_HUMAN	361	JCTSISGDLHILPVAFR	5 2 0 0 0		162	sp|P01033|TIMP1_HUMAN	53	FVGTPEVJQTTLYQR	5 4 2 0 2
163	sp|P00533|EGFR_HUMAN	361	JCTSISGDLHILPVAFR	7 2 0 0 0		163	sp|P01033|TIMP1_HUMAN	53	FVGTPEVJQTTLYQR	5 4 3 0 0
164	sp|P00533|EGFR_HUMAN	361	JCTSISGDLHILPVAFR	8 2 0 0 0		164	sp|P01033|TIMP1_HUMAN	53	FVGTPEVJQTTLYQR	5 4 3 0 1
165	sp|P00749|UROK_HUMAN	322	EJSTDYLYPEQLK	3 6 0 0 1		165	sp|P01033|TIMP1_HUMAN	53	FVGTPEVJQTTLYQR	5 5 0 0 1
166	sp|P00749|UROK_HUMAN	322	EJSTDYLYPEQLK	4 5 1 0 1		166	sp|P01033|TIMP1_HUMAN	53	FVGTPEVJQTTLYQR	5 5 0 0 2
167	sp|P00749|UROK_HUMAN	322	EJSTDYLYPEQLK	4 5 2 0 1		167	sp|P01033|TIMP1_HUMAN	53	FVGTPEVJQTTLYQR	5 5 1 0 0
168	sp|P00749|UROK_HUMAN	322	EJSTDYLYPEQLK	5 4 2 0 1		168	sp|P01033|TIMP1_HUMAN	53	FVGTPEVJQTTLYQR	5 5 1 0 1
169	sp|P00749|UROK_HUMAN	322	EJSTDYLYPEQLK	5 4 3 0 1		169	sp|P01033|TIMP1_HUMAN	53	FVGTPEVJQTTLYQR	5 5 1 0 2
170	sp|P00749|UROK_HUMAN	322	EJSTDYLYPEQLK	7 6 1 0 0		170	sp|P01033|TIMP1_HUMAN	53	FVGTPEVJQTTLYQR	5 5 2 0 0
171	sp|P01009|A1AT_HUMAN	271	YLGJATAIFFLPDEGK	5 4 2 0 1		171	sp|P01033|TIMP1_HUMAN	53	FVGTPEVJQTTLYQR	5 5 2 0 1
172	sp|P01033|TIMP1_HUMAN	53	AKFVGTPEVJQTTLYQR	3 6 0 0 2		172	sp|P01033|TIMP1_HUMAN	53	FVGTPEVJQTTLYQR	5 6 1 0 1
173	sp|P01033|TIMP1_HUMAN	53	AKFVGTPEVJQTTLYQR	4 5 1 0 1		173	sp|P01033|TIMP1_HUMAN	53	FVGTPEVJQTTLYQR	5 6 2 0 1
174	sp|P01033|TIMP1_HUMAN	53	AKFVGTPEVJQTTLYQR	4 5 1 0 2		174	sp|P01033|TIMP1_HUMAN	53	FVGTPEVJQTTLYQR	6 4 0 0 2
175	sp|P01033|TIMP1_HUMAN	53	AKFVGTPEVJQTTLYQR	4 5 2 0 1		175	sp|P01033|TIMP1_HUMAN	53	FVGTPEVJQTTLYQR	6 4 1 0 0
176	sp|P01033|TIMP1_HUMAN	53	AKFVGTPEVJQTTLYQR	5 4 1 0 2		176	sp|P01033|TIMP1_HUMAN	53	FVGTPEVJQTTLYQR	6 4 1 0 1
177	sp|P01033|TIMP1_HUMAN	53	AKFVGTPEVJQTTLYQR	5 4 2 0 0		177	sp|P01033|TIMP1_HUMAN	53	FVGTPEVJQTTLYQR	6 4 1 0 2
178	sp|P01033|TIMP1_HUMAN	53	AKFVGTPEVJQTTLYQR	5 4 2 0 1		178	sp|P01033|TIMP1_HUMAN	53	FVGTPEVJQTTLYQR	6 4 2 0 0
179	sp|P01033|TIMP1_HUMAN	53	AKFVGTPEVJQTTLYQR	5 4 3 0 1		179	sp|P01033|TIMP1_HUMAN	53	FVGTPEVJQTTLYQR	6 4 2 0 1
180	sp|P01033|TIMP1_HUMAN	53	AKFVGTPEVJQTTLYQR	5 5 2 0 1		180	sp|P01033|TIMP1_HUMAN	53	FVGTPEVJQTTLYQR	6 4 2 0 2
181	sp|P01033|TIMP1_HUMAN	53	AKFVGTPEVJQTTLYQR	6 5 3 0 1		181	sp|P01033|TIMP1_HUMAN	53	FVGTPEVJQTTLYQR	6 5 1 0 1
182	sp|P01033|TIMP1_HUMAN	53	AKFVGTPEVJQTTLYQR	7 6 3 0 1		182	sp|P01033|TIMP1_HUMAN	53	FVGTPEVJQTTLYQR	6 5 1 0 2
183	sp|P01033|TIMP1_HUMAN	53	AKFVGTPEVJQTTLYQR	7 6 4 0 1		183	sp|P01033|TIMP1_HUMAN	53	FVGTPEVJQTTLYQR	6 5 2 0 0
184	sp|P01033|TIMP1_HUMAN	53	AKFVGTPEVJQTTLYQRYEIK	5 4 2 0 1		184	sp|P01033|TIMP1_HUMAN	53	FVGTPEVJQTTLYQR	6 5 2 0 1
185	sp|P01033|TIMP1_HUMAN	53	FVGTPEVJQTTLYQR	3 5 1 0 1		185	sp|P01033|TIMP1_HUMAN	53	FVGTPEVJQTTLYQR	6 5 2 0 2
186	sp|P01033|TIMP1_HUMAN	53	FVGTPEVJQTTLYQR	3 6 0 0 1		186	sp|P01033|TIMP1_HUMAN	53	FVGTPEVJQTTLYQR	6 5 3 0 1
187	sp|P01033|TIMP1_HUMAN	53	FVGTPEVJQTTLYQR	3 6 0 0 2		187	sp|P01033|TIMP1_HUMAN	53	FVGTPEVJQTTLYQR	6 5 4 0 1
188	sp|P01033|TIMP1_HUMAN	53	FVGTPEVJQTTLYQR	3 6 0 0 3		188	sp|P01033|TIMP1_HUMAN	53	FVGTPEVJQTTLYQR	6 6 3 0 1
189	sp|P01033|TIMP1_HUMAN	53	FVGTPEVJQTTLYQR	3 6 0 0 4		189	sp|P01033|TIMP1_HUMAN	53	FVGTPEVJQTTLYQR	7 5 2 0 0
190	sp|P01033|TIMP1_HUMAN	53	FVGTPEVJQTTLYQR	4 3 1 0 1		190	sp|P01033|TIMP1_HUMAN	53	FVGTPEVJQTTLYQR	7 5 2 0 2
191	sp|P01033|TIMP1_HUMAN	53	FVGTPEVJQTTLYQR	4 4 1 0 1		191	sp|P01033|TIMP1_HUMAN	53	FVGTPEVJQTTLYQR	7 6 3 0 1
192	sp|P01033|TIMP1_HUMAN	53	FVGTPEVJQTTLYQR	4 5 0 0 1		192	sp|P01033|TIMP1_HUMAN	53	FVGTPEVJQTTLYQR	7 6 4 0 1
193	sp|P01033|TIMP1_HUMAN	53	FVGTPEVJQTTLYQR	4 5 0 0 2		193	sp|P01033|TIMP1_HUMAN	53	FVGTPEVJQTTLYQR	8 2 0 0 1
194	sp|P01033|TIMP1_HUMAN	53	FVGTPEVJQTTLYQR	4 5 0 0 3		194	sp|P01033|TIMP1_HUMAN	101	SHJRSEEFLIAGK	3 6 0 0 2
195	sp|P01033|TIMP1_HUMAN	53	FVGTPEVJQTTLYQR	4 5 1 0 0		195	sp|P01033|TIMP1_HUMAN	101	SHJRSEEFLIAGK	4 5 1 0 1
196	sp|P01033|TIMP1_HUMAN	53	FVGTPEVJQTTLYQR	4 5 1 0 1		196	sp|P01033|TIMP1_HUMAN	101	SHJRSEEFLIAGK	4 5 1 0 2
197	sp|P01033|TIMP1_HUMAN	53	FVGTPEVJQTTLYQR	4 5 1 0 2		197	sp|P01033|TIMP1_HUMAN	101	SHJRSEEFLIAGK	4 5 2 0 1
198	sp|P01033|TIMP1_HUMAN	53	FVGTPEVJQTTLYQR	4 5 1 1 1		198	sp|P01033|TIMP1_HUMAN	101	SHJRSEEFLIAGK	5 4 1 0 1
199	sp|P01033|TIMP1_HUMAN	53	FVGTPEVJQTTLYQR	4 5 2 0 1		199	sp|P01033|TIMP1_HUMAN	101	SHJRSEEFLIAGK	5 4 2 0 1
200	sp|P01033|TIMP1_HUMAN	53	FVGTPEVJQTTLYQR	4 5 2 0 2		200	sp|P01861|IGHG4_HUMAN	177	EEQFJSTYR	3 4 0 0 0
201	sp|P01033|TIMP1_HUMAN	53	FVGTPEVJQTTLYQR	4 6 1 0 0		201	sp|P01861|IGHG4_HUMAN	177	EEQFJSTYR	3 4 0 0 1
202	sp|P01033|TIMP1_HUMAN	53	FVGTPEVJQTTLYQR	4 6 1 0 1		202	sp|P02452|CO1A1_HUMAN/sp|P08123|CO1A2_HUMAN/sp|P02461|CO3A1_HUMAN	1365/1267/1367	ASQJITYHCK	6 2 0 0 0
203	sp|P01033|TIMP1_HUMAN	53	FVGTPEVJQTTLYQR	4 7 1 0 1		203	sp|P02452|CO1A1_HUMAN/sp|P08123|CO1A2_HUMAN/sp|P02461|CO3A1_HUMAN	1365/1267/1367	ASQJITYHCK	8 2 0 0 0
204	sp|P01033|TIMP1_HUMAN	53	FVGTPEVJQTTLYQR	4 7 2 0 1		204	sp|P02786|TFR1_HUMAN	727	KQNNGAFJETLFR	8 2 0 0 0
205	sp|P01033|TIMP1_HUMAN	53	FVGTPEVJQTTLYQR	5 4 0 0 3		205	sp|P02786|TFR1_HUMAN	727	QNNGAFJETLFR	5 2 0 0 0
206	sp|P01033|TIMP1_HUMAN	53	FVGTPEVJQTTLYQR	5 4 1 0 1		206	sp|P02786|TFR1_HUMAN	727	QNNGAFJETLFR	6 2 0 0 0
207	sp|P01033|TIMP1_HUMAN	53	FVGTPEVJQTTLYQR	5 4 1 0 2		207	sp|P02786|TFR1_HUMAN	727	QNNGAFJETLFR	7 2 0 0 0
208	sp|P01033|TIMP1_HUMAN	53	FVGTPEVJQTTLYQR	5 4 1 1 1		208	sp|P02786|TFR1_HUMAN	727	QNNGAFJETLFR	8 2 0 0 0
209	sp|P01033|TIMP1_HUMAN	53	FVGTPEVJQTTLYQR	5 4 2 0 0		209	sp|P04004|VTNC_HUMAN	169	JGSLFAFR	5 2 0 0 0
210	sp|P01033|TIMP1_HUMAN	53	FVGTPEVJQTTLYQR	5 4 2 0 1		210	sp|P04004|VTNC_HUMAN	169	JGSLFAFR	5 3 1 0 0
211	sp|P01033|TIMP1_HUMAN	53	FVGTPEVJQTTLYQR	5 4 2 0 2		211	sp|P04004|VTNC_HUMAN	169	JGSLFAFR	6 2 0 0 0
212	sp|P01033|TIMP1_HUMAN	53	FVGTPEVJQTTLYQR	5 4 3 0 1		212	sp|P04004|VTNC_HUMAN	169	JGSLFAFR	6 3 0 1 0
213	sp|P01033|TIMP1_HUMAN	53	FVGTPEVJQTTLYQR	5 5 0 0 1		213	sp|P04004|VTNC_HUMAN	169	JGSLFAFR	6 3 1 0 0
214	sp|P01033|TIMP1_HUMAN	53	FVGTPEVJQTTLYQR	5 5 1 0 0		214	sp|P04004|VTNC_HUMAN	169	JGSLFAFR	6 3 2 0 0
215	sp|P01033|TIMP1_HUMAN	53	FVGTPEVJQTTLYQR	5 5 1 0 1		215	sp|P05997|CO5A2_HUMAN	1400	EASQJITYICK	3 2 0 0 0
216	sp|P01033|TIMP1_HUMAN	53	FVGTPEVJQTTLYQR	5 5 1 0 2		216	sp|P05997|CO5A2_HUMAN	1400	EASQJITYICK	4 2 0 0 0
217	sp|P01033|TIMP1_HUMAN	53	FVGTPEVJQTTLYQR	5 5 2 0 0		217	sp|P05997|CO5A2_HUMAN	1400	EASQJITYICK	5 2 0 0 0
218	sp|P01033|TIMP1_HUMAN	53	FVGTPEVJQTTLYQR	5 5 2 0 1		218	sp|P05997|CO5A2_HUMAN	1400	EASQJITYICK	5 3 1 0 0
219	sp|P01033|TIMP1_HUMAN	53	FVGTPEVJQTTLYQR	5 6 1 0 1		219	sp|P05997|CO5A2_HUMAN	1400	EASQJITYICK	6 2 0 0 0
220	sp|P01033|TIMP1_HUMAN	53	FVGTPEVJQTTLYQR	5 6 1 0 2		220	sp|P05997|CO5A2_HUMAN	1400	EASQJITYICK	6 3 1 0 0
221	sp|P01033|TIMP1_HUMAN	53	FVGTPEVJQTTLYQR	5 6 1 0 5		221	sp|P05997|CO5A2_HUMAN	1400	EASQJITYICK	7 2 0 0 0
222	sp|P01033|TIMP1_HUMAN	53	FVGTPEVJQTTLYQR	5 6 2 0 1		222	sp|P05997|CO5A2_HUMAN	1400	EASQJITYICK	8 2 0 0 0
223	sp|P01033|TIMP1_HUMAN	53	FVGTPEVJQTTLYQR	5 6 2 0 2		223	sp|P06276|CHLE_HUMAN	284	EJETEIIK	5 2 0 0 0
224	sp|P01033|TIMP1_HUMAN	53	FVGTPEVJQTTLYQR	6 4 0 0 1		224	sp|P06276|CHLE_HUMAN	284	EJETEIIK	5 3 0 0 1
225	sp|P01033|TIMP1_HUMAN	53	FVGTPEVJQTTLYQR	6 4 1 0 0		225	sp|P06276|CHLE_HUMAN	284	EJETEIIK	6 2 0 0 0
226	sp|P01033|TIMP1_HUMAN	53	FVGTPEVJQTTLYQR	6 4 1 0 1		226	sp|P06276|CHLE_HUMAN	369	DJNSIITR	5 4 0 0 1
227	sp|P01033|TIMP1_HUMAN	53	FVGTPEVJQTTLYQR	6 4 1 0 2		227	sp|P06280|AGAL_HUMAN	139	LGIYADVGJK	5 4 2 0 1
228	sp|P01033|TIMP1_HUMAN	53	FVGTPEVJQTTLYQR	6 4 2 0 0		228	sp|P06756|ITAV_HUMAN	945	ENQJHSYSLK	5 2 0 0 0
229	sp|P01033|TIMP1_HUMAN	53	FVGTPEVJQTTLYQR	6 4 2 0 1		229	sp|P06756|ITAV_HUMAN	945	ENQJHSYSLK	6 2 0 0 0
230	sp|P01033|TIMP1_HUMAN	53	FVGTPEVJQTTLYQR	6 4 2 0 2		230	sp|P06865|HEXA_HUMAN	157	SAEGTFFIJK	6 2 0 0 0
231	sp|P01033|TIMP1_HUMAN	53	FVGTPEVJQTTLYQR	6 5 1 0 1		231	sp|P06865|HEXA_HUMAN	157	SAEGTFFIJK	7 2 0 0 0
232	sp|P01033|TIMP1_HUMAN	53	FVGTPEVJQTTLYQR	6 5 2 0 0		232	sp|P06865|HEXA_HUMAN	157	SAEGTFFIJK	8 2 0 0 0
233	sp|P01033|TIMP1_HUMAN	53	FVGTPEVJQTTLYQR	6 5 2 0 1		233	sp|P07339|CATD_HUMAN	263	GSLSYLJVTR	5 2 0 0 0
234	sp|P01033|TIMP1_HUMAN	53	FVGTPEVJQTTLYQR	6 5 2 0 2		234	sp|P07339|CATD_HUMAN	263	GSLSYLJVTR	5 2 0 0 1
235	sp|P01033|TIMP1_HUMAN	53	FVGTPEVJQTTLYQR	6 5 2 1 1		235	sp|P07339|CATD_HUMAN	263	GSLSYLJVTR	5 7 1 0 3
236	sp|P01033|TIMP1_HUMAN	53	FVGTPEVJQTTLYQR	6 5 3 0 1		236	sp|P07602|SAP_HUMAN	101	TCDWLPKPJMSASCK	2 2 0 0 1
237	sp|P01033|TIMP1_HUMAN	53	FVGTPEVJQTTLYQR	6 5 4 0 1		237	sp|P07602|SAP_HUMAN	101	TCDWLPKPJMSASCK	3 2 0 0 0
238	sp|P01033|TIMP1_HUMAN	53	FVGTPEVJQTTLYQR	6 6 1 0 1		238	sp|P07602|SAP_HUMAN	101	TCDWLPKPJMSASCK	3 2 0 0 1
239	sp|P01033|TIMP1_HUMAN	53	FVGTPEVJQTTLYQR	6 6 2 0 0		239	sp|P07602|SAP_HUMAN	101	TCDWLPKPJMSASCK	4 3 1 0 1
240	sp|P01033|TIMP1_HUMAN	53	FVGTPEVJQTTLYQR	6 6 2 0 1		240	sp|P07602|SAP_HUMAN	101	TCDWLPKPJMSASCK	5 4 2 0 1
241	sp|P01033|TIMP1_HUMAN	53	FVGTPEVJQTTLYQR	6 6 3 0 1		241	sp|P07602|SAP_HUMAN	215	TJSTFVQALVEHVK	2 2 0 0 1
242	sp|P01033|TIMP1_HUMAN	53	FVGTPEVJQTTLYQR	6 7 3 0 1		242	sp|P07602|SAP_HUMAN	215	TJSTFVQALVEHVK	3 2 0 0 1
243	sp|P01033|TIMP1_HUMAN	53	FVGTPEVJQTTLYQR	7 5 1 0 2		243	sp|P07602|SAP_HUMAN	215	TJSTFVQALVEHVK	3 3 0 0 1
244	sp|P01033|TIMP1_HUMAN	53	FVGTPEVJQTTLYQR	7 5 2 0 0		244	sp|P07602|SAP_HUMAN	215	TJSTFVQALVEHVK	3 4 0 0 1
245	sp|P01033|TIMP1_HUMAN	53	FVGTPEVJQTTLYQR	7 5 2 0 2		245	sp|P07602|SAP_HUMAN	215	TJSTFVQALVEHVK	4 2 0 0 0
246	sp|P01033|TIMP1_HUMAN	53	FVGTPEVJQTTLYQR	7 6 2 0 1		246	sp|P07602|SAP_HUMAN	215	TJSTFVQALVEHVK	4 2 0 0 1
247	sp|P01033|TIMP1_HUMAN	53	FVGTPEVJQTTLYQR	7 6 3 0 1		247	sp|P07602|SAP_HUMAN	215	TJSTFVQALVEHVK	4 3 1 0 1
248	sp|P01033|TIMP1_HUMAN	53	FVGTPEVJQTTLYQR	7 6 4 0 1		248	sp|P07602|SAP_HUMAN	215	TJSTFVQALVEHVK	5 2 0 0 0
249	sp|P01033|TIMP1_HUMAN	53	FVGTPEVJQTTLYQR	8 6 3 0 0		249	sp|P07602|SAP_HUMAN	215	TJSTFVQALVEHVK	5 2 0 0 1
250	sp|P01033|TIMP1_HUMAN	53	FVGTPEVJQTTLYQR	8 7 1 0 0		250	sp|P07602|SAP_HUMAN	215	TJSTFVQALVEHVK	5 4 0 0 1
251	sp|P01033|TIMP1_HUMAN	53	FVGTPEVJQTTLYQR	8 7 4 0 1		251	sp|P07602|SAP_HUMAN	215	TJSTFVQALVEHVK	5 4 1 0 1
252	sp|P01033|TIMP1_HUMAN	53	FVGTPEVJQTTLYQRYEIK	5 4 2 0 1		252	sp|P07602|SAP_HUMAN	215	TJSTFVQALVEHVK	5 4 2 0 1
253	sp|P01033|TIMP1_HUMAN	101	SHJRSEEFLIAGK	3 4 0 0 1		253	sp|P07602|SAP_HUMAN	215	TJSTFVQALVEHVK	6 5 2 0 1
254	sp|P01033|TIMP1_HUMAN	101	SHJRSEEFLIAGK	3 4 0 0 2		254	sp|P07602|SAP_HUMAN	215	TJSTFVQALVEHVK	6 5 3 0 1
255	sp|P01033|TIMP1_HUMAN	101	SHJRSEEFLIAGK	3 4 1 0 1		255	sp|P07602|SAP_HUMAN	215	TJSTFVQALVEHVK	8 7 1 0 0
256	sp|P01033|TIMP1_HUMAN	101	SHJRSEEFLIAGK	3 5 0 0 1		256	sp|P07602|SAP_HUMAN	215	TJSTFVQALVEHVKEECDR	4 3 1 0 1
257	sp|P01033|TIMP1_HUMAN	101	SHJRSEEFLIAGK	3 5 1 0 1		257	sp|P07602|SAP_HUMAN	215	TJSTFVQALVEHVKEECDR	5 4 0 0 1
258	sp|P01033|TIMP1_HUMAN	101	SHJRSEEFLIAGK	3 6 0 0 1		258	sp|P07602|SAP_HUMAN	215	TJSTFVQALVEHVKEECDR	5 4 1 0 1
259	sp|P01033|TIMP1_HUMAN	101	SHJRSEEFLIAGK	3 6 0 0 2		259	sp|P07602|SAP_HUMAN	215	TJSTFVQALVEHVKEECDR	5 4 2 0 1
260	sp|P01033|TIMP1_HUMAN	101	SHJRSEEFLIAGK	3 6 0 0 3		260	sp|P07602|SAP_HUMAN	332	LIDNJK	5 2 0 0 0
261	sp|P01033|TIMP1_HUMAN	101	SHJRSEEFLIAGK	4 3 0 0 1		261	sp|P07602|SAP_HUMAN	332	LIDNJKTEK	1 2 0 0 0
262	sp|P01033|TIMP1_HUMAN	101	SHJRSEEFLIAGK	4 3 1 0 1		262	sp|P07602|SAP_HUMAN	332	LIDNJKTEK	2 2 0 0 0
263	sp|P01033|TIMP1_HUMAN	101	SHJRSEEFLIAGK	4 4 0 0 1		263	sp|P07602|SAP_HUMAN	332	LIDNJKTEK	2 2 0 0 1
264	sp|P01033|TIMP1_HUMAN	101	SHJRSEEFLIAGK	4 4 1 0 1		264	sp|P07602|SAP_HUMAN	332	LIDNJKTEK	3 2 0 0 0
265	sp|P01033|TIMP1_HUMAN	101	SHJRSEEFLIAGK	4 5 0 0 1		265	sp|P07602|SAP_HUMAN	332	LIDNJKTEK	3 2 0 0 1
266	sp|P01033|TIMP1_HUMAN	101	SHJRSEEFLIAGK	4 5 0 0 2		266	sp|P07602|SAP_HUMAN	332	LIDNJKTEK	4 2 0 0 0
267	sp|P01033|TIMP1_HUMAN	101	SHJRSEEFLIAGK	4 5 0 0 3		267	sp|P07602|SAP_HUMAN	332	LIDNJKTEK	4 2 0 0 1
268	sp|P01033|TIMP1_HUMAN	101	SHJRSEEFLIAGK	4 5 1 0 1		268	sp|P07602|SAP_HUMAN	332	LIDNJKTEK	5 2 0 0 0
269	sp|P01033|TIMP1_HUMAN	101	SHJRSEEFLIAGK	4 5 1 0 2		269	sp|P07602|SAP_HUMAN	332	LIDNJKTEK	5 2 0 0 1
270	sp|P01033|TIMP1_HUMAN	101	SHJRSEEFLIAGK	4 5 1 1 1		270	sp|P07602|SAP_HUMAN	332	LIDNJKTEK	6 5 0 0 0
271	sp|P01033|TIMP1_HUMAN	101	SHJRSEEFLIAGK	4 5 2 0 0		271	sp|P07602|SAP_HUMAN	426	JSTKQEILAALEK	5 2 0 0 0
272	sp|P01033|TIMP1_HUMAN	101	SHJRSEEFLIAGK	4 5 2 0 1		272	sp|P07942|LAMB1_HUMAN	677	GTJYTVR	5 4 0 0 1
273	sp|P01033|TIMP1_HUMAN	101	SHJRSEEFLIAGK	4 6 1 0 0		273	sp|P07996|TSP1_HUMAN	1067	VVJSTTGPGEHLR	3 6 0 0 0
274	sp|P01033|TIMP1_HUMAN	101	SHJRSEEFLIAGK	4 6 1 0 1		274	sp|P07996|TSP1_HUMAN	1067	VVJSTTGPGEHLR	4 5 0 0 0
275	sp|P01033|TIMP1_HUMAN	101	SHJRSEEFLIAGK	4 7 0 0 2		275	sp|P07996|TSP1_HUMAN	1067	VVJSTTGPGEHLR	4 5 1 0 0
276	sp|P01033|TIMP1_HUMAN	101	SHJRSEEFLIAGK	5 4 0 0 1		276	sp|P07996|TSP1_HUMAN	1067	VVJSTTGPGEHLR	5 4 1 0 0
277	sp|P01033|TIMP1_HUMAN	101	SHJRSEEFLIAGK	5 4 0 0 2		277	sp|P07996|TSP1_HUMAN	1067	VVJSTTGPGEHLR	5 4 2 0 0
278	sp|P01033|TIMP1_HUMAN	101	SHJRSEEFLIAGK	5 4 0 0 3		278	sp|P07996|TSP1_HUMAN	1067	VVJSTTGPGEHLR	5 5 0 0 0
279	sp|P01033|TIMP1_HUMAN	101	SHJRSEEFLIAGK	5 4 1 0 1		279	sp|P07996|TSP1_HUMAN	1067	VVJSTTGPGEHLR	6 4 0 1 0
280	sp|P01033|TIMP1_HUMAN	101	SHJRSEEFLIAGK	5 4 1 0 2		280	sp|P08236|BGLR_HUMAN	272	VVAJGTGTQGQLK	5 2 0 0 0
281	sp|P01033|TIMP1_HUMAN	101	SHJRSEEFLIAGK	5 4 2 0 1		281	sp|P08581|MET_HUMAN	785	JFTVACQHR	5 4 0 0 1
282	sp|P01033|TIMP1_HUMAN	101	SHJRSEEFLIAGK	5 4 3 0 1		282	sp|P08581|MET_HUMAN	785	JFTVACQHR	5 4 1 0 1
283	sp|P01033|TIMP1_HUMAN	101	SHJRSEEFLIAGK	5 5 0 0 1		283	sp|P0C7U0|ELFN1_HUMAN	210	WLAAFTJATQTYDR	5 4 2 0 1
284	sp|P01033|TIMP1_HUMAN	101	SHJRSEEFLIAGK	5 5 1 0 1		284	sp|P10253|LYAG_HUMAN	390	QVVEJMTR	3 2 0 0 0
285	sp|P01033|TIMP1_HUMAN	101	SHJRSEEFLIAGK	5 5 1 0 2		285	sp|P10253|LYAG_HUMAN	390	QVVEJMTR	6 2 0 0 0
286	sp|P01033|TIMP1_HUMAN	101	SHJRSEEFLIAGK	5 5 2 0 1		286	sp|P10253|LYAG_HUMAN	470	GVFITJETGQPLIGK	5 2 0 0 0
287	sp|P01033|TIMP1_HUMAN	101	SHJRSEEFLIAGK	5 6 2 0 1		287	sp|P10253|LYAG_HUMAN	470	GVFITJETGQPLIGK	6 2 0 0 0
288	sp|P01033|TIMP1_HUMAN	101	SHJRSEEFLIAGK	6 4 0 0 1		288	sp|P10253|LYAG_HUMAN	882	JNTIVNELVR	3 2 0 0 1
289	sp|P01033|TIMP1_HUMAN	101	SHJRSEEFLIAGK	6 4 0 0 2		289	sp|P10253|LYAG_HUMAN	882	JNTIVNELVR	5 4 2 0 1
290	sp|P01033|TIMP1_HUMAN	101	SHJRSEEFLIAGK	6 4 1 0 1		290	sp|P10316|1A69_HUMAN/sp|P01892|1A02_HUMAN	110/110	GYYJQSEAGSHTVQR	5 4 2 0 1
291	sp|P01033|TIMP1_HUMAN	101	SHJRSEEFLIAGK	6 5 1 0 1		291	sp|P10646|TFPI1_HUMAN	145	YFYNJQTK	3 6 0 0 1
292	sp|P01033|TIMP1_HUMAN	101	SHJRSEEFLIAGK	6 5 2 0 1		292	sp|P10646|TFPI1_HUMAN	145	YFYNJQTK	3 6 0 0 2
293	sp|P01033|TIMP1_HUMAN	101	SHJRSEEFLIAGK	6 5 3 0 1		293	sp|P10646|TFPI1_HUMAN	145	YFYNJQTK	3 6 0 0 3
294	sp|P01033|TIMP1_HUMAN	101	SHJRSEEFLIAGK	9 2 0 0 0		294	sp|P10646|TFPI1_HUMAN	145	YFYNJQTK	4 5 0 0 1
295	sp|P01033|TIMP1_HUMAN	101	SHJRSEEFLIAGK	9 2 0 0 1		295	sp|P10646|TFPI1_HUMAN	145	YFYNJQTK	4 5 0 0 2
296	sp|P01130|LDLR_HUMAN	657	LTGSDVNLLAENLLSPEDMVLFHJLTQPR	5 4 1 0 1		296	sp|P10646|TFPI1_HUMAN	145	YFYNJQTK	4 5 1 0 1
297	sp|P01130|LDLR_HUMAN	657	LTGSDVNLLAENLLSPEDMVLFHJLTQPR	5 4 2 0 1		297	sp|P10646|TFPI1_HUMAN	145	YFYNJQTK	4 5 1 0 2
298	sp|P01137|TGFB1_HUMAN	136	QSTHSIYMFFJTSELR	6 5 2 0 0		298	sp|P10646|TFPI1_HUMAN	145	YFYNJQTK	4 5 2 0 0
299	sp|P01137|TGFB1_HUMAN	136	QSTHSIYMFFJTSELR	6 5 3 0 0		299	sp|P10646|TFPI1_HUMAN	145	YFYNJQTK	4 5 2 0 1
300	sp|P01137|TGFB1_HUMAN	136	QSTHSIYMFFJTSELR	6 6 1 0 0		300	sp|P10646|TFPI1_HUMAN	145	YFYNJQTK	5 4 2 0 1
301	sp|P01861|IGHG4_HUMAN	177	EEQFJSTYR	3 4 0 0 1		301	sp|P10909|CLUS_HUMAN	374	LAJLTQGEDQYYLR	4 5 2 0 0
302	sp|P02786|TFR1_HUMAN	251	KDFEDLYTPVJGSIVIVR	5 4 1 0 1		302	sp|P10909|CLUS_HUMAN	374	LAJLTQGEDQYYLR	4 5 2 0 1
303	sp|P02786|TFR1_HUMAN	251	KDFEDLYTPVJGSIVIVR	5 4 2 0 1		303	sp|P10909|CLUS_HUMAN	374	LAJLTQGEDQYYLR	5 4 2 0 1
304	sp|P02786|TFR1_HUMAN	251	KDFEDLYTPVJGSIVIVR	6 5 2 0 1		304	sp|P10909|CLUS_HUMAN	374	LAJLTQGEDQYYLR	5 4 3 0 1
305	sp|P02786|TFR1_HUMAN	251	KDFEDLYTPVJGSIVIVR	6 5 3 0 1		305	sp|P10909|CLUS_HUMAN	374	LAJLTQGEDQYYLR	6 4 1 0 1
306	sp|P02786|TFR1_HUMAN	727	KQNNGAFJETLFR	5 2 0 0 0		306	sp|P10909|CLUS_HUMAN	374	LAJLTQGEDQYYLR	6 5 3 0 1
307	sp|P02786|TFR1_HUMAN	727	KQNNGAFJETLFR	6 2 0 0 0		307	sp|P11047|LAMC1_HUMAN	650	LLNJLTSIK	5 2 0 0 0
308	sp|P02786|TFR1_HUMAN	727	KQNNGAFJETLFR	7 2 0 0 0		308	sp|P11047|LAMC1_HUMAN	650	LLNJLTSIK	6 2 0 0 0
309	sp|P02786|TFR1_HUMAN	727	KQNNGAFJETLFR	8 2 0 0 0		309	sp|P11047|LAMC1_HUMAN	650	LLNJLTSIK	6 3 0 0 0
310	sp|P02786|TFR1_HUMAN	727	KQNNGAFJETLFR	9 2 0 0 0		310	sp|P11047|LAMC1_HUMAN	650	LLNJLTSIK	7 2 0 0 0
311	sp|P02786|TFR1_HUMAN	727	QNNGAFJETLFR	5 2 0 0 0		311	sp|P11047|LAMC1_HUMAN	650	LLNJLTSIK	8 2 0 0 0
312	sp|P02786|TFR1_HUMAN	727	QNNGAFJETLFR	6 2 0 0 0		312	sp|P11047|LAMC1_HUMAN	1022	CDQCEENYFYJR	5 4 2 0 0
313	sp|P02786|TFR1_HUMAN	727	QNNGAFJETLFR	7 2 0 0 0		313	sp|P11047|LAMC1_HUMAN	1107	VJNTLSSQISR	5 4 0 0 0
314	sp|P02786|TFR1_HUMAN	727	QNNGAFJETLFR	8 2 0 0 0		314	sp|P11047|LAMC1_HUMAN	1107	VJNTLSSQISR	5 4 0 0 1
315	sp|P02786|TFR1_HUMAN	727	QNNGAFJETLFR	9 2 0 0 0		315	sp|P11047|LAMC1_HUMAN	1107	VJNTLSSQISR	5 4 1 0 0
316	sp|P04004|VTNC_HUMAN	169	JGSLFAFR	5 2 0 0 0		316	sp|P11047|LAMC1_HUMAN	1107	VJNTLSSQISR	5 4 1 0 1
317	sp|P04004|VTNC_HUMAN	169	JGSLFAFR	5 3 1 0 0		317	sp|P11047|LAMC1_HUMAN	1205	TAJDTSTEAYNLLLR	4 3 0 0 0
318	sp|P04004|VTNC_HUMAN	169	JGSLFAFR	5 3 2 0 0		318	sp|P11047|LAMC1_HUMAN	1205	TAJDTSTEAYNLLLR	5 2 0 0 0
319	sp|P04004|VTNC_HUMAN	169	JGSLFAFR	6 2 0 0 0		319	sp|P11047|LAMC1_HUMAN	1205	TAJDTSTEAYNLLLR	5 3 0 0 0
320	sp|P04004|VTNC_HUMAN	169	JGSLFAFR	6 3 1 0 0		320	sp|P11047|LAMC1_HUMAN	1205	TAJDTSTEAYNLLLR	5 3 1 0 0
321	sp|P04004|VTNC_HUMAN	169	JGSLFAFR	6 3 2 0 0		321	sp|P11047|LAMC1_HUMAN	1205	TAJDTSTEAYNLLLR	5 4 1 0 0
322	sp|P04062|GLCM_HUMAN	309	DLGPTLAJSTHHNVR	3 2 0 0 1		322	sp|P11047|LAMC1_HUMAN	1205	TAJDTSTEAYNLLLR	6 2 0 0 0
323	sp|P05556|ITB1_HUMAN	669	KDTCTQECSYFJITK	5 4 1 0 1		323	sp|P11047|LAMC1_HUMAN	1205	TAJDTSTEAYNLLLR	6 3 0 0 0
324	sp|P05997|CO5A2_HUMAN	1400	EASQJITYICK	3 2 0 0 0		324	sp|P11047|LAMC1_HUMAN	1205	TAJDTSTEAYNLLLR	7 2 0 0 0
325	sp|P05997|CO5A2_HUMAN	1400	EASQJITYICK	4 2 0 0 0		325	sp|P11047|LAMC1_HUMAN	1205	TAJDTSTEAYNLLLR	8 2 0 0 0
326	sp|P05997|CO5A2_HUMAN	1400	EASQJITYICK	5 2 0 0 0		326	sp|P11047|LAMC1_HUMAN	1241	JISQDLEK	5 4 0 0 1
327	sp|P05997|CO5A2_HUMAN	1400	EASQJITYICK	5 3 1 0 0		327	sp|P11047|LAMC1_HUMAN	1241	JISQDLEK	5 4 1 0 1
328	sp|P05997|CO5A2_HUMAN	1400	EASQJITYICK	6 2 0 0 0		328	sp|P11047|LAMC1_HUMAN	1241	JISQDLEK	5 4 2 0 1
329	sp|P05997|CO5A2_HUMAN	1400	EASQJITYICK	6 3 1 0 0		329	sp|P11047|LAMC1_HUMAN	1241	JISQDLEK	5 5 0 0 1
330	sp|P05997|CO5A2_HUMAN	1400	EASQJITYICK	7 2 0 0 0		330	sp|P11047|LAMC1_HUMAN	1395	KIPAIJQTITEANEK	5 4 2 0 1
331	sp|P05997|CO5A2_HUMAN	1400	EASQJITYICK	8 2 0 0 0		331	sp|P11047|LAMC1_HUMAN	1439	JATSTK	5 4 2 0 1
332	sp|P06276|CHLE_HUMAN	284	EJETEIIK	5 4 0 0 1		332	sp|P11279|LAMP1_HUMAN	84	SSCGKEJTSDPSLVIAFGR	3 2 0 0 1
333	sp|P06276|CHLE_HUMAN	369	DJNSIITR	5 4 0 0 1		333	sp|P11279|LAMP1_HUMAN	84	SSCGKEJTSDPSLVIAFGR	5 4 0 0 3
334	sp|P06280|AGAL_HUMAN	139	LGIYADVGJK	5 4 2 0 1		334	sp|P11279|LAMP1_HUMAN	103	GHTLTLJFTR	5 2 0 0 0
335	sp|P06280|AGAL_HUMAN	139	LGIYADVGJK	6 5 3 0 1		335	sp|P11279|LAMP1_HUMAN	103	GHTLTLJFTR	6 2 0 0 0
336	sp|P06280|AGAL_HUMAN	139	LGIYADVGJK	8 7 1 0 0		336	sp|P11279|LAMP1_HUMAN	103	GHTLTLJFTR	7 2 0 0 0
337	sp|P06280|AGAL_HUMAN	192	HMSLALJR	4 7 0 0 4		337	sp|P11279|LAMP1_HUMAN	261	LLNINPJK	5 2 0 0 0
338	sp|P06280|AGAL_HUMAN	192	HMSLALJR	5 2 0 0 0		338	sp|P11717|MPRI_HUMAN	400	YHJQTLR	5 2 0 0 0
339	sp|P06756|ITAV_HUMAN	615	TAADTTGLQPILNQFTPAJISR	9 2 0 0 0		339	sp|P11717|MPRI_HUMAN	400	YHJQTLR	7 2 0 0 0
340	sp|P06756|ITAV_HUMAN	945	ENQJHSYSLK	5 2 0 0 0		340	sp|P11717|MPRI_HUMAN	400	YHJQTLR	8 2 0 0 0
341	sp|P06756|ITAV_HUMAN	945	ENQJHSYSLK	6 2 0 0 0		341	sp|P11717|MPRI_HUMAN	581	TJITLVCKPGDLESAPVLR	5 2 0 0 0
342	sp|P06865|HEXA_HUMAN	157	SAEGTFFIJK	7 2 0 0 0		342	sp|P11717|MPRI_HUMAN	581	TJITLVCKPGDLESAPVLR	6 2 0 0 0
343	sp|P06865|HEXA_HUMAN	157	SAEGTFFIJK	8 2 0 0 0		343	sp|P11717|MPRI_HUMAN	581	TJITLVCKPGDLESAPVLR	7 2 0 0 0
344	sp|P07339|CATD_HUMAN	263	GSLSYLJVTR	5 2 0 0 0		344	sp|P11717|MPRI_HUMAN	581	TJITLVCKPGDLESAPVLR	8 2 0 0 0
345	sp|P07339|CATD_HUMAN	263	GSLSYLJVTR	5 2 0 0 1		345	sp|P11717|MPRI_HUMAN	1312	MJFTGGDTCHK	7 2 0 0 0
346	sp|P07602|SAP_HUMAN	101	TCDWLPKPJMSASCK	5 4 2 0 1		346	sp|P11717|MPRI_HUMAN	1312	MJFTGGDTCHK	8 2 0 0 0
347	sp|P07602|SAP_HUMAN	101	TCDWLPKPJMSASCK	6 5 2 0 1		347	sp|P11717|MPRI_HUMAN	1656	JGSSIVDLSPLIHR	5 4 2 0 1
348	sp|P07602|SAP_HUMAN	101	TCDWLPKPJMSASCK	7 6 2 0 1		348	sp|P13473|LAMP2_HUMAN	356	VQPFJVTQGK	3 2 0 0 1
349	sp|P07996|TSP1_HUMAN	248	GCSSSTSVLLTLDNNVVJGSSPAIR	5 4 2 0 1		349	sp|P13473|LAMP2_HUMAN	356	VQPFJVTQGK	5 2 0 0 0
350	sp|P07996|TSP1_HUMAN	360	KVSCPIMPCSJATVPDGECCPR	5 4 1 0 1		350	sp|P13473|LAMP2_HUMAN	356	VQPFJVTQGK	6 2 0 0 0
351	sp|P07996|TSP1_HUMAN	360	KVSCPIMPCSJATVPDGECCPR	5 4 2 0 1		351	sp|P13987|CD59_HUMAN	43	TAVJCSSDFDACLITK	5 4 2 0 1
352	sp|P07996|TSP1_HUMAN	360	VSCPIMPCSJATVPDGECCPR	5 4 1 0 1		352	sp|P14210|HGF_HUMAN	566	QVLJVSQLVYGPEGSDLVLMK	3 6 0 0 1
353	sp|P07996|TSP1_HUMAN	360	VSCPIMPCSJATVPDGECCPR	5 4 2 0 1		353	sp|P14210|HGF_HUMAN	566	QVLJVSQLVYGPEGSDLVLMK	4 5 1 0 1
354	sp|P07996|TSP1_HUMAN	360	VSCPIMPCSJATVPDGECCPR	6 4 1 0 2		354	sp|P14210|HGF_HUMAN	653	GKVTLJESEICAGAEK	4 5 0 0 1
355	sp|P07996|TSP1_HUMAN	1067	VVJSTTGPGEHLR	3 6 0 0 0		355	sp|P14210|HGF_HUMAN	653	GKVTLJESEICAGAEK	4 5 0 0 2
356	sp|P07996|TSP1_HUMAN	1067	VVJSTTGPGEHLR	4 5 0 0 0		356	sp|P14210|HGF_HUMAN	653	GKVTLJESEICAGAEK	5 5 0 0 1
357	sp|P07996|TSP1_HUMAN	1067	VVJSTTGPGEHLR	4 5 1 0 0		357	sp|P14210|HGF_HUMAN	653	VTLJESEICAGAEK	4 5 0 0 0
358	sp|P07996|TSP1_HUMAN	1067	VVJSTTGPGEHLR	5 4 0 0 0		358	sp|P14210|HGF_HUMAN	653	VTLJESEICAGAEK	4 5 0 0 1
359	sp|P07996|TSP1_HUMAN	1067	VVJSTTGPGEHLR	5 4 0 0 1		359	sp|P14210|HGF_HUMAN	653	VTLJESEICAGAEK	4 5 0 0 2
360	sp|P07996|TSP1_HUMAN	1067	VVJSTTGPGEHLR	5 4 1 0 0		360	sp|P14210|HGF_HUMAN	653	VTLJESEICAGAEK	4 5 1 0 0
361	sp|P07996|TSP1_HUMAN	1067	VVJSTTGPGEHLR	5 4 2 0 0		361	sp|P14210|HGF_HUMAN	653	VTLJESEICAGAEK	4 5 1 0 1
362	sp|P07996|TSP1_HUMAN	1067	VVJSTTGPGEHLR	5 5 0 0 0		362	sp|P14210|HGF_HUMAN	653	VTLJESEICAGAEK	5 4 1 0 1
363	sp|P07996|TSP1_HUMAN	1067	VVJSTTGPGEHLR	5 5 1 0 0		363	sp|P14210|HGF_HUMAN	653	VTLJESEICAGAEK	5 4 2 0 1
364	sp|P07996|TSP1_HUMAN	1067	VVJSTTGPGEHLR	6 4 0 1 0		364	sp|P14210|HGF_HUMAN	653	VTLJESEICAGAEK	5 5 0 0 0
365	sp|P07996|TSP1_HUMAN	1067	VVJSTTGPGEHLR	6 5 0 0 0		365	sp|P14210|HGF_HUMAN	653	VTLJESEICAGAEK	5 5 0 0 1
366	sp|P07996|TSP1_HUMAN	1067	VVJSTTGPGEHLR	7 4 0 0 0		366	sp|P14625|ENPL_HUMAN	217	HNJDTQHIWESDSNEFSVIADPR	5 2 0 0 0
367	sp|P08236|BGLR_HUMAN	272	VVAJGTGTQGQLK	5 2 0 0 0		367	sp|P15018|LIF_HUMAN	138	LJATADILR	5 4 1 0 1
368	sp|P08581|MET_HUMAN	785	JFTVACQHR	5 4 1 0 1		368	sp|P15018|LIF_HUMAN	138	LJATADILR	5 4 2 0 1
369	sp|P10316|1A69_HUMAN/sp|P01892|1A02_HUMAN	110/110	GYYJQSEAGSHTVQR	5 4 1 0 1		369	sp|P15018|LIF_HUMAN	138	LJATADILR	6 5 2 0 1
370	sp|P10316|1A69_HUMAN/sp|P01892|1A02_HUMAN	110/110	GYYJQSEAGSHTVQR	5 4 2 0 1		370	sp|P15151|PVR_HUMAN	120	VEDEGJYTCLFVTFPQGSR	5 4 1 0 1
371	sp|P10316|1A69_HUMAN/sp|P01892|1A02_HUMAN	110/110	GYYJQSEAGSHTVQR	5 5 2 0 1		371	sp|P15586|GNS_HUMAN	405	GASJLTWR	5 2 0 0 0
372	sp|P10316|1A69_HUMAN/sp|P01892|1A02_HUMAN	110/110	GYYJQSEAGSHTVQR	6 5 3 0 1		372	sp|P16070|CD44_HUMAN	57	AFJSTLPTMAQMEK	5 4 2 0 0
373	sp|P10586|PTPRF_HUMAN	721	KVEVEPLJSTAVHVYWK	5 4 1 0 1		373	sp|P16070|CD44_HUMAN	57	AFJSTLPTMAQMEK	5 4 2 0 1
374	sp|P10619|PPGB_HUMAN	333	MDPPCTJTTAASTYLNNPYVR	5 2 0 0 0		374	sp|P16070|CD44_HUMAN	57	AFJSTLPTMAQMEK	6 4 2 0 0
375	sp|P10646|TFPI1_HUMAN	145	YFYNJQTK	3 6 0 0 1		375	sp|P16070|CD44_HUMAN	57	AFJSTLPTMAQMEK	6 5 3 0 1
376	sp|P10646|TFPI1_HUMAN	145	YFYNJQTK	3 6 0 0 2		376	sp|P16070|CD44_HUMAN	57	AFJSTLPTMAQMEK	8 7 1 0 0
377	sp|P10646|TFPI1_HUMAN	145	YFYNJQTK	3 6 0 0 3		377	sp|P16870|CBPE_HUMAN	139	GJETIVNLIHSTR	5 2 0 0 0
378	sp|P10646|TFPI1_HUMAN	145	YFYNJQTK	4 5 0 0 2		378	sp|P16870|CBPE_HUMAN	139	GJETIVNLIHSTR	6 3 1 0 0
379	sp|P10646|TFPI1_HUMAN	145	YFYNJQTK	4 5 1 0 1		379	sp|P17301|ITA2_HUMAN	1074	GEYFVJVTTR	7 2 0 0 0
380	sp|P10646|TFPI1_HUMAN	145	YFYNJQTK	4 5 1 0 2		380	sp|P19022|CADH2_HUMAN	651	RJWTITR	6 2 0 0 0
381	sp|P10646|TFPI1_HUMAN	145	YFYNJQTK	4 5 2 0 0		381	sp|P19022|CADH2_HUMAN	651	RJWTITR	7 2 0 0 0
382	sp|P10646|TFPI1_HUMAN	145	YFYNJQTK	4 5 2 0 1		382	sp|P19022|CADH2_HUMAN	651	RJWTITR	8 2 0 0 0
385	sp|P10646|TFPI1_HUMAN	145	YFYNJQTK	5 4 2 0 1		385	sp|P19022|CADH2_HUMAN	651	RJWTITR	9 2 0 0 0
384	sp|P10646|TFPI1_HUMAN	145	YFYNJQTK	5 6 2 0 3		384	sp|P19022|CADH2_HUMAN	692	SJISILR	4 2 0 0 0
386	sp|P10909|CLUS_HUMAN	103	LKELPGVCJETMMALWEECKPCLK	5 4 2 0 1		386	sp|P19022|CADH2_HUMAN	692	SJISILR	5 2 0 0 0
387	sp|P10909|CLUS_HUMAN	103	LKELPGVCJETMMALWEECKPCLK	6 5 2 0 1		387	sp|P19022|CADH2_HUMAN	692	SJISILR	5 3 0 0 1
389	sp|P10909|CLUS_HUMAN	103	LKELPGVCJETMMALWEECKPCLK	6 5 3 0 1		389	sp|P19022|CADH2_HUMAN	692	SJISILR	5 3 1 0 1
392	sp|P10909|CLUS_HUMAN	374	LAJLTQGEDQYYLR	4 5 2 0 1		392	sp|P19022|CADH2_HUMAN	692	SJISILR	5 4 0 0 1
394	sp|P10909|CLUS_HUMAN	374	LAJLTQGEDQYYLR	5 4 2 0 1		394	sp|P19022|CADH2_HUMAN	692	SJISILR	5 4 1 0 1
396	sp|P10909|CLUS_HUMAN	374	LAJLTQGEDQYYLR	5 4 3 0 1		396	sp|P19022|CADH2_HUMAN	692	SJISILR	5 5 0 0 1
398	sp|P10909|CLUS_HUMAN	374	LAJLTQGEDQYYLR	6 5 3 0 1		398	sp|P19022|CADH2_HUMAN	692	SJISILR	6 2 0 0 0
401	sp|P10909|CLUS_HUMAN	374	LAJLTQGEDQYYLR	6 5 4 0 1		401	sp|P19022|CADH2_HUMAN	692	SJISILR	6 3 0 0 0
383	sp|P10909|CLUS_HUMAN	374	LAJLTQGEDQYYLR	7 6 1 0 0		383	sp|P19022|CADH2_HUMAN	692	SJISILR	6 3 1 0 0
388	sp|P10909|CLUS_HUMAN	374	LAJLTQGEDQYYLR	7 6 4 0 1		388	sp|P19022|CADH2_HUMAN/sp|P55283|CADH4_HUMAN	651/661	JWTITR	5 2 0 0 0
390	sp|P11047|LAMC1_HUMAN	576	QVLSYGQJLSFSFR	6 2 0 0 0		390	sp|P19022|CADH2_HUMAN/sp|P55283|CADH4_HUMAN	651/661	JWTITR	6 2 0 0 0
391	sp|P11047|LAMC1_HUMAN	650	LLNJLTSIK	5 2 0 0 0		391	sp|P19022|CADH2_HUMAN/sp|P55283|CADH4_HUMAN	651/661	JWTITR	7 2 0 0 0
393	sp|P11047|LAMC1_HUMAN	650	LLNJLTSIK	6 2 0 0 0		393	sp|P19022|CADH2_HUMAN/sp|P55283|CADH4_HUMAN	651/661	JWTITR	8 2 0 0 0
395	sp|P11047|LAMC1_HUMAN	650	LLNJLTSIK	7 2 0 0 0		395	sp|P19022|CADH2_HUMAN/sp|P55283|CADH4_HUMAN	651/661	JWTITR	9 2 0 0 0
397	sp|P11047|LAMC1_HUMAN	650	LLNJLTSIK	8 2 0 0 0		397	sp|P19438|TNR1A_HUMAN	54	YIHPQJNSICCTK	5 4 2 0 1
399	sp|P11047|LAMC1_HUMAN	1241	JISQDLEK	5 4 0 0 1		399	sp|P20645|MPRD_HUMAN	57	LKPLFJK	5 2 0 0 0
400	sp|P11117|PPAL_HUMAN	167	YEQLQJETR	5 2 0 0 0		400	sp|P20645|MPRD_HUMAN	57	LKPLFJK	6 2 0 0 0
402	sp|P11717|MPRI_HUMAN	400	YHJQTLR	5 2 0 0 0		402	sp|P20645|MPRD_HUMAN	57	LKPLFJK	7 2 0 0 0
403	sp|P11717|MPRI_HUMAN	400	YHJQTLR	8 2 0 0 0		403	sp|P20827|EFNA1_HUMAN	26	HTVFWJSSNPK	5 2 0 0 0
404	sp|P11717|MPRI_HUMAN	581	TJITLVCKPGDLESAPVLR	6 2 0 0 0		404	sp|P20827|EFNA1_HUMAN	26	HTVFWJSSNPK	6 2 0 0 0
405	sp|P11717|MPRI_HUMAN	1312	MJFTGGDTCHK	7 2 0 0 0		405	sp|P20827|EFNA1_HUMAN	26	HTVFWJSSNPK	7 2 0 0 0
406	sp|P11717|MPRI_HUMAN	1312	MJFTGGDTCHK	8 2 0 0 0		406	sp|P20933|ASPG_HUMAN	38	JATEAAWR	5 2 0 0 0
407	sp|P11717|MPRI_HUMAN	1312	MJFTGGDTCHK	9 2 0 0 0		407	sp|P21589|5NTD_HUMAN	311	GNVISSHGNPILLJSSIPEDPSIK	5 2 0 0 0
408	sp|P11717|MPRI_HUMAN	1656	JGSSIVDLSPLIHR	5 4 2 0 1		408	sp|P23229|ITA6_HUMAN	323	AJHSGAVVLLK	5 2 0 0 0
409	sp|P12109|CO6A1_HUMAN	212	RJFTAADWGQSR	5 4 2 0 1		409	sp|P23229|ITA6_HUMAN	323	AJHSGAVVLLK	6 2 0 0 0
410	sp|P12110|CO6A2_HUMAN	140	GTFTDCALAJMTEQIR	5 4 2 0 0		410	sp|P23229|ITA6_HUMAN	323	AJHSGAVVLLK	6 3 0 0 0
411	sp|P14210|HGF_HUMAN	402	NYMGJLSQTR	3 6 0 0 2		411	sp|P23229|ITA6_HUMAN	997	LWJSTFLEEYSK	9 2 0 0 0
412	sp|P14210|HGF_HUMAN	566	CKQVLJVSQLVYGPEGSDLVLMK	3 6 0 0 1		412	sp|P23284|PPIB_HUMAN	148	DTJGSQFFITTVK	4 5 2 0 0
413	sp|P14210|HGF_HUMAN	566	QVLJVSQLVYGPEGSDLVLMK	3 6 0 0 1		413	sp|P23284|PPIB_HUMAN	148	DTJGSQFFITTVK	4 5 2 0 1
414	sp|P14210|HGF_HUMAN	566	QVLJVSQLVYGPEGSDLVLMK	3 6 0 0 2		414	sp|P23284|PPIB_HUMAN	148	DTJGSQFFITTVK	5 4 2 0 1
415	sp|P14210|HGF_HUMAN	566	QVLJVSQLVYGPEGSDLVLMK	4 5 0 0 1		415	sp|P24821|TENA_HUMAN	184	GPJCSEPECPGNCHLR	5 4 0 0 1
416	sp|P14210|HGF_HUMAN	566	QVLJVSQLVYGPEGSDLVLMK	4 5 0 0 2		416	sp|P24821|TENA_HUMAN	184	GPJCSEPECPGNCHLR	6 5 0 0 1
417	sp|P14210|HGF_HUMAN	566	QVLJVSQLVYGPEGSDLVLMK	4 5 1 0 1		417	sp|P24821|TENA_HUMAN	1034	JTTSYVLR	3 6 0 0 1
418	sp|P14210|HGF_HUMAN	566	QVLJVSQLVYGPEGSDLVLMK	5 4 1 0 1		418	sp|P24821|TENA_HUMAN	1034	JTTSYVLR	4 3 0 0 1
419	sp|P14210|HGF_HUMAN	566	QVLJVSQLVYGPEGSDLVLMK	5 4 2 0 1		419	sp|P24821|TENA_HUMAN	1034	JTTSYVLR	4 4 0 0 1
420	sp|P14210|HGF_HUMAN	566	QVLJVSQLVYGPEGSDLVLMK	5 5 0 0 1		420	sp|P24821|TENA_HUMAN	1034	JTTSYVLR	4 5 0 0 1
421	sp|P14210|HGF_HUMAN	566	QVLJVSQLVYGPEGSDLVLMK	5 5 1 0 1		421	sp|P24821|TENA_HUMAN	1034	JTTSYVLR	5 4 0 0 1
422	sp|P14210|HGF_HUMAN	653	GKVTLJESEICAGAEK	3 6 0 0 1		422	sp|P24821|TENA_HUMAN	1034	JTTSYVLR	5 4 1 0 1
423	sp|P14210|HGF_HUMAN	653	GKVTLJESEICAGAEK	4 5 0 0 1		423	sp|P24821|TENA_HUMAN	1034	JTTSYVLR	5 4 2 0 1
424	sp|P14210|HGF_HUMAN	653	GKVTLJESEICAGAEK	4 5 0 0 2		424	sp|P24821|TENA_HUMAN	1034	JTTSYVLR	5 5 0 0 1
425	sp|P14210|HGF_HUMAN	653	GKVTLJESEICAGAEK	4 5 1 0 1		425	sp|P24821|TENA_HUMAN	1034	JTTSYVLR	5 5 1 0 1
426	sp|P14210|HGF_HUMAN	653	GKVTLJESEICAGAEK	4 5 2 0 1		426	sp|P24821|TENA_HUMAN	1392	VEAAQJLTLPGSLR	5 4 2 0 1
427	sp|P14210|HGF_HUMAN	653	GKVTLJESEICAGAEK	5 4 1 0 1		427	sp|P24821|TENA_HUMAN	1392	VEAAQJLTLPGSLR	6 5 3 0 1
428	sp|P14210|HGF_HUMAN	653	GKVTLJESEICAGAEK	5 4 2 0 1		428	sp|P24821|TENA_HUMAN/sp|P24821|TENA_HUMAN	1119/1301	JLTVPGSLR	5 4 1 0 1
429	sp|P14210|HGF_HUMAN	653	GKVTLJESEICAGAEK	5 5 0 0 1		429	sp|P24821|TENA_HUMAN/sp|P24821|TENA_HUMAN	1119/1301	JLTVPGSLR	5 5 0 0 1
430	sp|P14210|HGF_HUMAN	653	GKVTLJESEICAGAEK	5 5 1 0 1		430	sp|P24821|TENA_HUMAN/sp|P24821|TENA_HUMAN	1119/1301	JLTVPGSLR	6 5 2 0 1
431	sp|P14210|HGF_HUMAN	653	VTLJESEICAGAEK	4 5 0 0 1		431	sp|P26006|ITA3_HUMAN	265	JITIVTGAPR	5 4 2 0 1
432	sp|P14210|HGF_HUMAN	653	VTLJESEICAGAEK	4 5 0 0 2		432	sp|P26006|ITA3_HUMAN	935	VWJSTFIEDYR	8 2 0 0 0
433	sp|P14210|HGF_HUMAN	653	VTLJESEICAGAEK	5 4 1 0 1		433	sp|P26006|ITA3_HUMAN	935	VWJSTFIEDYR	9 2 0 0 0
434	sp|P14210|HGF_HUMAN	653	VTLJESEICAGAEK	5 4 2 0 1		434	sp|P26006|ITA3_HUMAN	935	VWJSTFIEDYRDFDR	4 6 0 0 0
435	sp|P14210|HGF_HUMAN	653	VTLJESEICAGAEK	5 5 0 0 1		435	sp|P26006|ITA3_HUMAN	935	VWJSTFIEDYRDFDR	9 2 0 0 0
436	sp|P14625|ENPL_HUMAN	217	HNJDTQHIWESDSNEFSVIADPR	5 2 0 0 0		436	sp|P28799|GRN_HUMAN	265	EJATTDLLTK	5 2 0 0 0
437	sp|P15586|GNS_HUMAN	362	GPGIKPJQTSK	5 2 0 0 0		437	sp|P28799|GRN_HUMAN	530	DVECGEGHFCHDJQTCCR	5 4 1 0 1
438	sp|P16070|CD44_HUMAN	57	AFJSTLPTMAQMEK	6 5 3 0 1		438	sp|P30530|UFO_HUMAN	198	SLHVPGLJK	5 4 1 0 1
439	sp|P16870|CBPE_HUMAN	139	GJETIVNLIHSTR	5 2 0 0 0		439	sp|P32004|L1CAM_HUMAN	849	GYJVTYWR	7 2 0 0 0
440	sp|P16870|CBPE_HUMAN	139	GJETIVNLIHSTR	6 3 1 0 0		440	sp|P38571|LICH_HUMAN/sp|Q5W064|LIPJ_HUMAN/sp|Q5VXJ0|LIPK_HUMAN	273/240/271	NLJMSR	5 2 0 0 0
441	sp|P17301|ITA2_HUMAN	112	TJMSLGLILTR	9 2 0 0 0		441	sp|P38571|LICH_HUMAN/sp|Q5W064|LIPJ_HUMAN/sp|Q5VXJ0|LIPK_HUMAN	273/240/271	NLJMSR	6 2 0 0 0
442	sp|P17301|ITA2_HUMAN	1074	GEYFVJVTTR	7 2 0 0 0		442	sp|P38571|LICH_HUMAN/sp|Q5W064|LIPJ_HUMAN/sp|Q5VXJ0|LIPK_HUMAN	273/240/271	NLJMSR	7 2 0 0 0
443	sp|P19022|CADH2_HUMAN	402	VDIIVAJLTVTDKDQPHTPAWNAVYR	5 4 2 0 1		443	sp|P38571|LICH_HUMAN/sp|Q5W064|LIPJ_HUMAN/sp|Q5VXJ0|LIPK_HUMAN	273/240/271	NLJMSR	8 2 0 0 0
444	sp|P19022|CADH2_HUMAN	651	RJWTITR	3 2 0 0 0		444	sp|P38571|LICH_HUMAN/sp|Q5W064|LIPJ_HUMAN/sp|Q5VXJ0|LIPK_HUMAN	273/240/271	NLJMSR	9 2 0 0 0
445	sp|P19022|CADH2_HUMAN	651	RJWTITR	4 2 0 0 0		445	sp|P40200|TACT_HUMAN	497	AFSEVPTTAJGSTK	3 2 0 0 1
446	sp|P19022|CADH2_HUMAN	651	RJWTITR	5 2 0 0 0		446	sp|P41271|NBL1_HUMAN	39	JITQIVGHSGCEAK	4 5 1 0 1
447	sp|P19022|CADH2_HUMAN	651	RJWTITR	6 2 0 0 0		447	sp|P41271|NBL1_HUMAN	39	JITQIVGHSGCEAK	4 5 1 0 2
448	sp|P19022|CADH2_HUMAN	651	RJWTITR	7 2 0 0 0		448	sp|P41271|NBL1_HUMAN	39	JITQIVGHSGCEAK	4 5 2 0 1
449	sp|P19022|CADH2_HUMAN	651	RJWTITR	8 2 0 0 0		449	sp|P41271|NBL1_HUMAN	39	JITQIVGHSGCEAK	5 4 1 0 1
450	sp|P19022|CADH2_HUMAN	651	RJWTITR	9 2 0 0 0		450	sp|P41271|NBL1_HUMAN	39	JITQIVGHSGCEAK	5 4 2 0 1
451	sp|P19022|CADH2_HUMAN	692	FLEAGIYEVPIIITDSGNPPKSJISILR	5 4 1 0 1		451	sp|P41271|NBL1_HUMAN	39	JITQIVGHSGCEAK	5 5 1 0 1
452	sp|P19022|CADH2_HUMAN	692	IKFLEAGIYEVPIIITDSGNPPKSJISILR	5 2 0 0 0		452	sp|P42785|PCP_HUMAN	47	JYSVLYFQQK	5 4 2 0 1
453	sp|P19022|CADH2_HUMAN	692	SJISILR	5 2 0 0 0		453	sp|P48307|TFPI2_HUMAN	116	YFFJLSSMTCEK	4 5 1 0 1
454	sp|P19022|CADH2_HUMAN	692	SJISILR	5 4 1 0 1		454	sp|P48307|TFPI2_HUMAN	170	DEGLCSAJVTR	3 6 0 0 2
455	sp|P19022|CADH2_HUMAN	692	SJISILR	6 3 0 0 0		455	sp|P49746|TSP3_HUMAN	937	CJDTVPEDFEPFR	5 2 0 0 0
456	sp|P19022|CADH2_HUMAN/sp|P55283|CADH4_HUMAN	651/661	JWTITR	5 2 0 0 0		456	sp|P49767|VEGFC_HUMAN	205	PVTISFAJHTSCR	5 2 0 0 0
457	sp|P19022|CADH2_HUMAN/sp|P55283|CADH4_HUMAN	651/661	JWTITR	6 2 0 0 0		457	sp|P49767|VEGFC_HUMAN	205	PVTISFAJHTSCR	5 3 1 0 0
458	sp|P19022|CADH2_HUMAN/sp|P55283|CADH4_HUMAN	651/661	JWTITR	7 2 0 0 0		458	sp|P49767|VEGFC_HUMAN	205	PVTISFAJHTSCR	6 2 0 0 0
459	sp|P19022|CADH2_HUMAN/sp|P55283|CADH4_HUMAN	651/661	JWTITR	8 2 0 0 0		459	sp|P49767|VEGFC_HUMAN	205	PVTISFAJHTSCR	6 3 1 0 0
460	sp|P19022|CADH2_HUMAN/sp|P55283|CADH4_HUMAN	651/661	JWTITR	9 2 0 0 0		460	sp|P49767|VEGFC_HUMAN	240	SLPATLPQCQAAJK	4 5 0 0 1
461	sp|P20645|MPRD_HUMAN	57	LKPLFJK	5 2 0 0 0		461	sp|P49767|VEGFC_HUMAN	240	SLPATLPQCQAAJK	4 5 1 0 1
462	sp|P20645|MPRD_HUMAN	57	LKPLFJK	6 2 0 0 0		462	sp|P49767|VEGFC_HUMAN	240	SLPATLPQCQAAJK	4 5 1 0 2
463	sp|P20645|MPRD_HUMAN	57	LKPLFJK	7 2 0 0 0		463	sp|P49767|VEGFC_HUMAN	240	SLPATLPQCQAAJK	4 5 2 0 1
464	sp|P20645|MPRD_HUMAN	57	LKPLFJK	8 2 0 0 0		464	sp|P49767|VEGFC_HUMAN	240	SLPATLPQCQAAJK	5 4 1 0 1
465	sp|P20827|EFNA1_HUMAN	26	HTVFWJSSNPK	5 2 0 0 0		465	sp|P49767|VEGFC_HUMAN	240	SLPATLPQCQAAJK	5 4 2 0 1
466	sp|P20827|EFNA1_HUMAN	26	HTVFWJSSNPK	6 2 0 0 0		466	sp|P50454|SERPH_HUMAN	120	SLSJSTAR	5 2 0 0 0
467	sp|P20827|EFNA1_HUMAN	26	HTVFWJSSNPK	7 2 0 0 0		467	sp|P50897|PPT1_HUMAN	197	JHSIFLADINQER	3 2 0 0 1
468	sp|P20827|EFNA1_HUMAN	26	HTVFWJSSNPK	8 2 0 0 0		468	sp|P50897|PPT1_HUMAN	197	JHSIFLADINQER	5 2 0 0 0
469	sp|P21589|5NTD_HUMAN	311	GNVISSHGNPILLJSSIPEDPSIK	7 2 0 0 0		469	sp|P50897|PPT1_HUMAN	212	GIJESYK	5 2 0 0 0
470	sp|P22304|IDS_HUMAN	115	VHAGJFSTIPQYFK	5 3 1 0 0		470	sp|P50897|PPT1_HUMAN	212	GIJESYKK	5 2 0 0 0
471	sp|P22304|IDS_HUMAN	115	VHAGJFSTIPQYFK	5 4 1 0 1		471	sp|P52803|EFNA5_HUMAN	37	YAVYWJSSNPR	5 2 0 0 0
472	sp|P23229|ITA6_HUMAN	323	AJHSGAVVLLK	5 2 0 0 0		472	sp|P52803|EFNA5_HUMAN	37	YAVYWJSSNPR	6 2 0 0 0
473	sp|P23229|ITA6_HUMAN	323	AJHSGAVVLLK	5 3 0 0 0		473	sp|P52803|EFNA5_HUMAN	37	YAVYWJSSNPR	7 2 0 0 0
474	sp|P23229|ITA6_HUMAN	323	AJHSGAVVLLK	5 3 1 0 0		474	sp|P52823|STC1_HUMAN	133	LJVCSIAK	3 5 0 0 1
475	sp|P23229|ITA6_HUMAN	323	AJHSGAVVLLK	5 4 1 0 0		475	sp|P52823|STC1_HUMAN	133	LJVCSIAK	3 6 0 0 1
476	sp|P23229|ITA6_HUMAN	323	AJHSGAVVLLK	6 2 0 0 0		476	sp|P52823|STC1_HUMAN	133	LJVCSIAK	3 6 0 0 2
477	sp|P23229|ITA6_HUMAN	323	AJHSGAVVLLK	6 3 0 0 0		477	sp|P52823|STC1_HUMAN	133	LJVCSIAK	4 5 0 0 1
478	sp|P23229|ITA6_HUMAN	997	LWJSTFLEEYSK	9 2 0 0 0		478	sp|P52823|STC1_HUMAN	133	LJVCSIAK	4 5 0 0 2
479	sp|P23284|PPIB_HUMAN	148	DTJGSQFFITTVK	4 5 2 0 1		479	sp|P52823|STC1_HUMAN	133	LJVCSIAK	4 5 1 0 1
480	sp|P23284|PPIB_HUMAN	148	DTJGSQFFITTVK	5 4 2 0 1		480	sp|P52823|STC1_HUMAN	133	LJVCSIAK	4 5 1 0 2
481	sp|P24821|TENA_HUMAN	38	QSGVJATLPEENQPVVFNHVYNIK	4 5 0 0 1		481	sp|P52823|STC1_HUMAN	133	LJVCSIAK	4 5 2 0 1
482	sp|P24821|TENA_HUMAN	38	QSGVJATLPEENQPVVFNHVYNIK	5 4 0 0 1		482	sp|P52823|STC1_HUMAN	133	LJVCSIAK	5 4 1 0 1
483	sp|P24821|TENA_HUMAN	38	QSGVJATLPEENQPVVFNHVYNIK	5 4 2 0 1		483	sp|P52823|STC1_HUMAN	133	LJVCSIAK	5 4 2 0 1
484	sp|P24821|TENA_HUMAN	166	GJFSTEGCGCVCEPGWK	7 6 1 0 1		484	sp|P52823|STC1_HUMAN	133	LJVCSIAK	5 4 3 0 1
485	sp|P24821|TENA_HUMAN	184	GPJCSEPECPGNCHLR	5 4 1 0 1		485	sp|P52823|STC1_HUMAN	133	LJVCSIAK	7 7 0 0 1
486	sp|P24821|TENA_HUMAN	788	QTGLAPGQEYEISLHIVKJNTR	5 4 1 0 1		486	sp|P53634|CATC_HUMAN	53	DVJCSVMGPQEK	5 2 0 0 0
487	sp|P24821|TENA_HUMAN	788	QTGLAPGQEYEISLHIVKJNTR	5 4 2 0 1		487	sp|P53634|CATC_HUMAN	53	DVJCSVMGPQEK	5 4 1 0 1
488	sp|P24821|TENA_HUMAN	1018	LJYSLPTGQWVGVQLPR	5 2 0 0 0		488	sp|P54289|CA2D1_HUMAN	324	DAVNJITAK	8 2 0 0 0
489	sp|P24821|TENA_HUMAN	1018	LJYSLPTGQWVGVQLPR	5 3 0 0 0		489	sp|P61812|TGFB2_HUMAN	140	JASNLVK	5 2 0 0 0
490	sp|P24821|TENA_HUMAN	1018	LJYSLPTGQWVGVQLPR	5 3 1 0 0		490	sp|P61812|TGFB2_HUMAN	140	JASNLVK	6 2 0 0 0
491	sp|P24821|TENA_HUMAN	1018	LJYSLPTGQWVGVQLPR	5 4 1 0 0		491	sp|P61812|TGFB2_HUMAN	140	JASNLVK	6 3 0 0 0
492	sp|P24821|TENA_HUMAN	1018	LJYSLPTGQWVGVQLPR	5 4 2 0 0		492	sp|P61812|TGFB2_HUMAN	140	JASNLVK	7 2 0 0 0
493	sp|P24821|TENA_HUMAN	1018	LJYSLPTGQWVGVQLPR	6 2 0 0 0		493	sp|P78536|ADA17_HUMAN	174	SEDIKJVSR	5 2 0 0 0
494	sp|P24821|TENA_HUMAN	1018	LJYSLPTGQWVGVQLPR	6 3 0 0 0		494	sp|P78536|ADA17_HUMAN	174	SEDIKJVSR	6 3 0 0 0
495	sp|P24821|TENA_HUMAN	1018	LJYSLPTGQWVGVQLPR	6 3 1 0 0		495	sp|P78536|ADA17_HUMAN	174	SEDIKJVSR	6 3 1 0 0
496	sp|P24821|TENA_HUMAN	1018	LJYSLPTGQWVGVQLPR	7 2 0 0 0		496	sp|P78536|ADA17_HUMAN	264	JTSWDNAGFK	5 2 0 0 0
497	sp|P24821|TENA_HUMAN	1018	LJYSLPTGQWVGVQLPR	8 2 0 0 0		497	sp|P98160|PGBM_HUMAN	1755	NLHQSJTSR	5 4 1 0 1
498	sp|P24821|TENA_HUMAN	1034	JTTSYVLR	4 5 0 0 1		498	sp|P98160|PGBM_HUMAN	3780	SLTQGSLIVGDLAPVJGTSQGK	5 3 1 0 1
499	sp|P24821|TENA_HUMAN	1034	JTTSYVLR	5 4 0 0 1		499	sp|P98160|PGBM_HUMAN	3780	SLTQGSLIVGDLAPVJGTSQGK	5 4 1 0 1
500	sp|P24821|TENA_HUMAN	1034	JTTSYVLR	5 4 1 0 1		500	sp|Q02487|DSC2_HUMAN	629	AIJDTAAR	5 2 0 0 0
501	sp|P24821|TENA_HUMAN	1034	JTTSYVLR	5 4 2 0 1		501	sp|Q02742|GCNT1_HUMAN	58	HLELAGENPSSDIJCTK	6 3 1 0 0
502	sp|P24821|TENA_HUMAN	1034	JTTSYVLR	5 5 0 0 1		502	sp|Q02809|PLOD1_HUMAN	538	YIHQJYTK	5 2 0 0 0
503	sp|P24821|TENA_HUMAN	1034	JTTSYVLR	5 5 1 0 1		503	sp|Q02809|PLOD1_HUMAN	538	YIHQJYTK	5 4 1 0 0
504	sp|P24821|TENA_HUMAN/sp|P24821|TENA_HUMAN	1119/1301	JLTVPGSLR	5 4 1 0 1		504	sp|Q02809|PLOD1_HUMAN	538	YIHQJYTK	5 4 1 0 1
505	sp|P26006|ITA3_HUMAN	265	JITIVTGAPR	5 4 2 0 0		505	sp|Q02809|PLOD1_HUMAN	538	YIHQJYTK	5 5 0 0 0
506	sp|P26006|ITA3_HUMAN	573	LRPIIISMJYSLPLR	9 2 0 0 0		506	sp|Q02809|PLOD1_HUMAN	538	YIHQJYTK	5 5 0 0 1
507	sp|P26006|ITA3_HUMAN	605	SLDAYPILNQAQALEJHTEVQFQK	8 2 0 0 0		507	sp|Q07954|LRP1_HUMAN	1763	LYWISSGJHTIJR	6 2 0 0 0
508	sp|P26006|ITA3_HUMAN	656	LLLSIJVTNTR	7 2 0 0 0		508	sp|Q07954|LRP1_HUMAN	2620	DGTCIGJSSR	5 2 0 0 0
509	sp|P30447|1A23_HUMAN/sp|P05534|1A24_HUMAN	110/110	YYJQSEAGSHTLQMMFGCDVGSDGR	5 4 2 0 1		509	sp|Q07954|LRP1_HUMAN/sp|Q9NZR2|LRP1B_HUMAN	1995/1983	LJGSFR	6 2 0 0 0
510	sp|P30530|UFO_HUMAN	198	SLHVPGLJK	5 4 1 0 1		510	sp|Q08380|LG3BP_HUMAN	69	ALGFEJATQALGR	6 5 2 0 1
511	sp|P30530|UFO_HUMAN	198	SLHVPGLJKTSSFSCEAHNAK	5 4 1 0 1		511	sp|Q08380|LG3BP_HUMAN	69	ALGFEJATQALGR	7 6 0 0 1
512	sp|P33908|MA1A1_HUMAN	513	TCHESYJR	5 4 2 0 1		512	sp|Q08380|LG3BP_HUMAN	551	AAIPSALDTJSSK	4 3 2 0 2
513	sp|P34059|GALNS_HUMAN	423	QGIDFCPGQJVSGVTTHNLEDHTK	4 6 0 0 0		513	sp|Q08380|LG3BP_HUMAN	551	AAIPSALDTJSSK	5 2 0 0 0
514	sp|P34059|GALNS_HUMAN	423	QGIDFCPGQJVSGVTTHNLEDHTK	7 2 0 0 0		514	sp|Q08380|LG3BP_HUMAN	551	AAIPSALDTJSSK	5 3 0 0 1
515	sp|P34059|GALNS_HUMAN	423	QGIDFCPGQJVSGVTTHNLEDHTK	8 2 0 0 0		515	sp|Q08380|LG3BP_HUMAN	551	AAIPSALDTJSSK	5 3 1 0 1
516	sp|P34059|GALNS_HUMAN	423	QGIDFCPGQJVSGVTTHNLEDHTK	9 2 0 0 0		516	sp|Q08380|LG3BP_HUMAN	551	AAIPSALDTJSSK	5 4 0 0 1
517	sp|P35052|GPC1_HUMAN	116	SFDDHFQHLLJDSER	4 5 0 0 0		517	sp|Q08380|LG3BP_HUMAN	551	AAIPSALDTJSSK	5 4 1 0 1
518	sp|P35052|GPC1_HUMAN	116	SFDDHFQHLLJDSER	5 2 0 0 0		518	sp|Q08380|LG3BP_HUMAN	551	AAIPSALDTJSSK	5 5 0 0 1
519	sp|P35052|GPC1_HUMAN	116	SFDDHFQHLLJDSER	5 4 0 0 0		519	sp|Q08380|LG3BP_HUMAN	551	AAIPSALDTJSSK	6 2 0 0 0
520	sp|P35052|GPC1_HUMAN	116	SFDDHFQHLLJDSER	5 4 1 0 1		520	sp|Q08380|LG3BP_HUMAN	551	AAIPSALDTJSSK	6 3 0 0 0
521	sp|P35052|GPC1_HUMAN	116	SFDDHFQHLLJDSER	5 5 0 0 0		521	sp|Q08380|LG3BP_HUMAN	551	AAIPSALDTJSSK	6 3 1 0 0
522	sp|P38571|LICH_HUMAN/sp|Q5W064|LIPJ_HUMAN/sp|Q5VXJ0|LIPK_HUMAN	273/240/271	NLJMSR	5 2 0 0 0		522	sp|Q08380|LG3BP_HUMAN	551	AAIPSALDTJSSK	6 5 0 0 1
523	sp|P38571|LICH_HUMAN/sp|Q5W064|LIPJ_HUMAN/sp|Q5VXJ0|LIPK_HUMAN	273/240/271	NLJMSR	7 2 0 0 0		523	sp|Q08380|LG3BP_HUMAN	551	AAIPSALDTJSSK	6 5 1 0 1
524	sp|P38571|LICH_HUMAN/sp|Q5W064|LIPJ_HUMAN/sp|Q5VXJ0|LIPK_HUMAN	273/240/271	NLJMSR	8 2 0 0 0		524	sp|Q08380|LG3BP_HUMAN	551	AAIPSALDTJSSK	6 5 2 0 1
525	sp|P41271|NBL1_HUMAN	39	JITQIVGHSGCEAK	5 4 2 0 1		525	sp|Q08380|LG3BP_HUMAN	551	AAIPSALDTJSSK	7 2 0 0 0
526	sp|P42785|PCP_HUMAN	415	JISSHTNIVFSNGELDPWSGGGVTK	9 2 0 0 0		526	sp|Q08380|LG3BP_HUMAN	551	AAIPSALDTJSSK	7 6 0 0 1
527	sp|P43251|BTD_HUMAN	119	DVQIIVFPEDGIHGFJFTR	5 4 1 0 1		527	sp|Q08380|LG3BP_HUMAN	551	AAIPSALDTJSSK	7 6 1 0 1
528	sp|P43251|BTD_HUMAN	119	DVQIIVFPEDGIHGFJFTR	5 4 2 0 1		528	sp|Q08380|LG3BP_HUMAN	551	AAIPSALDTJSSK	7 6 2 0 1
529	sp|P43251|BTD_HUMAN	349	NPVGLIGAEJATGETDPSHSK	7 6 4 0 1		529	sp|Q08431|MFGM_HUMAN	238	JNSIPDK	5 2 0 0 0
530	sp|P45877|PPIC_HUMAN	190	VIDGMTVVHSIELQATDGHDRPLTJCSIINSGK	4 5 1 0 2		530	sp|Q08431|MFGM_HUMAN	238	JNSIPDK	6 3 0 0 0
531	sp|P48307|TFPI2_HUMAN	116	YFFJLSSMTCEK	4 5 1 0 1		531	sp|Q08431|MFGM_HUMAN	238	JNSIPDK	6 3 1 0 0
532	sp|P48307|TFPI2_HUMAN	170	DEGLCSAJVTR	3 6 0 0 2		532	sp|Q08431|MFGM_HUMAN	238	JNSIPDK	7 2 0 0 0
533	sp|P49746|TSP3_HUMAN	407	LGFLGJQSQGCLPAR	5 4 2 0 1		533	sp|Q08431|MFGM_HUMAN	238	JNSIPDK	8 2 0 0 0
534	sp|P49767|VEGFC_HUMAN	240	SLPATLPQCQAAJK	4 5 0 0 2		534	sp|Q08722|CD47_HUMAN	73	DIYTFDGALJK	6 2 0 0 0
535	sp|P49767|VEGFC_HUMAN	240	SLPATLPQCQAAJK	5 4 2 0 1		535	sp|Q08722|CD47_HUMAN	73	DIYTFDGALJK	6 3 0 0 0
536	sp|P49767|VEGFC_HUMAN	240	SLPATLPQCQAAJK	5 5 0 0 1		536	sp|Q08722|CD47_HUMAN	73	DIYTFDGALJK	6 3 1 0 0
537	sp|P51693|APLP1_HUMAN	551	KVJASVPR	5 4 2 0 1		537	sp|Q08722|CD47_HUMAN	73	DIYTFDGALJK	7 2 0 0 0
538	sp|P51884|LUM_HUMAN	127	KLHINHNJLTESVGPLPK	5 4 1 0 1		538	sp|Q12866|MERTK_HUMAN	170	SDJGSYICK	5 2 0 0 0
539	sp|P51884|LUM_HUMAN	127	KLHINHNJLTESVGPLPK	5 4 2 0 1		539	sp|Q12866|MERTK_HUMAN	170	SDJGSYICK	5 3 0 0 0
540	sp|P51884|LUM_HUMAN	127	LHINHNJLTESVGPLPK	5 4 1 0 1		540	sp|Q12866|MERTK_HUMAN	170	SDJGSYICK	5 4 0 0 0
541	sp|P51884|LUM_HUMAN	127	LHINHNJLTESVGPLPK	5 4 2 0 1		541	sp|Q12866|MERTK_HUMAN	170	SDJGSYICK	6 2 0 0 0
542	sp|P51884|LUM_HUMAN	160	LGSFEGLVJLTFIHLQHNR	5 4 2 0 1		542	sp|Q12866|MERTK_HUMAN	170	SDJGSYICK	6 3 0 0 0
543	sp|P52798|EFNA4_HUMAN	33	HVVYWJSSNPR	5 2 0 0 0		543	sp|Q12866|MERTK_HUMAN	170	SDJGSYICK	7 2 0 0 0
544	sp|P52798|EFNA4_HUMAN	33	HVVYWJSSNPR	6 2 0 0 0		544	sp|Q12866|MERTK_HUMAN	316	JCSIQVK	5 2 0 0 0
545	sp|P52803|EFNA5_HUMAN	37	YAVYWJSSNPR	5 2 0 0 0		545	sp|Q12866|MERTK_HUMAN	316	JCSIQVK	5 4 1 0 0
546	sp|P52803|EFNA5_HUMAN	37	YAVYWJSSNPR	6 2 0 0 0		546	sp|Q12866|MERTK_HUMAN	316	JCSIQVK	5 5 0 0 0
547	sp|P52803|EFNA5_HUMAN	37	YAVYWJSSNPR	7 2 0 0 0		547	sp|Q12866|MERTK_HUMAN	316	JCSIQVK	6 2 0 0 0
548	sp|P52803|EFNA5_HUMAN	37	YAVYWJSSNPR	8 2 0 0 0		548	sp|Q12866|MERTK_HUMAN	316	JCSIQVK	7 2 0 0 0
549	sp|P52823|STC1_HUMAN	133	LJVCSIAK	4 5 1 0 1		549	sp|Q13308|PTK7_HUMAN	175	DGTPLSDGQSJHTVSSK	5 4 2 0 1
550	sp|P52823|STC1_HUMAN	133	LJVCSIAK	4 5 2 0 1		550	sp|Q13308|PTK7_HUMAN	405	RQDVJITVATVPSWLK	5 4 2 0 1
551	sp|P52823|STC1_HUMAN	133	LJVCSIAK	5 4 2 0 1		551	sp|Q13443|ADAM9_HUMAN	125	GYVEGVHJSSIALSDCFGLR	5 2 0 0 0
552	sp|P52823|STC1_HUMAN	133	LJVCSIAK	5 4 2 0 3		552	sp|Q13443|ADAM9_HUMAN	125	GYVEGVHJSSIALSDCFGLR	5 4 1 0 0
553	sp|P53634|CATC_HUMAN	53	DVJCSVMGPQEK	5 4 1 0 1		553	sp|Q13443|ADAM9_HUMAN	125	GYVEGVHJSSIALSDCFGLR	5 5 0 0 0
554	sp|P53634|CATC_HUMAN	53	DVJCSVMGPQEK	5 4 2 0 1		554	sp|Q13443|ADAM9_HUMAN	381	JFSSCSAEDFEK	5 2 0 0 0
555	sp|P53634|CATC_HUMAN	53	DVJCSVMGPQEK	6 5 2 0 1		555	sp|Q13510|ASAH1_HUMAN	259	TVLEJSTSYEEAK	5 2 0 0 0
556	sp|P55268|LAMB2_HUMAN	1499	AQAALDKAJASR	5 4 0 0 1		556	sp|Q13740|CD166_HUMAN	167	LGDCISEDSYPDGJITWYR	5 5 0 0 1
557	sp|P69849|NOMO3_HUMAN/sp|Q15155|NOMO1_HUMAN/sp|Q5JPE7|NOMO2_HUMAN	369/369/369	LEJITTGTYTIHAQK	5 4 2 0 1		557	sp|Q13740|CD166_HUMAN	361	JATVVWMK	5 4 2 0 1
558	sp|P78536|ADA17_HUMAN	103	VVVVDGKJESEYTVK	6 5 3 0 1		558	sp|Q14126|DSG2_HUMAN	182	IJATDADEPNTLNSK	5 4 1 0 1
559	sp|P78536|ADA17_HUMAN	174	SEDIKJVSR	5 2 0 0 0		559	sp|Q14126|DSG2_HUMAN	182	IJATDADEPNTLNSK	5 5 0 0 1
560	sp|P78536|ADA17_HUMAN	174	SEDIKJVSR	6 3 0 0 0		560	sp|Q14126|DSG2_HUMAN	462	YVQJGTYTVK	5 4 1 0 1
561	sp|P78536|ADA17_HUMAN	174	SEDIKJVSR	6 3 1 0 0		561	sp|Q14264|ENR1_HUMAN	105	EGDLLJQTK	5 2 0 0 0
562	sp|P78536|ADA17_HUMAN	264	JTSWDNAGFK	5 2 0 0 0		562	sp|Q14517|FAT1_HUMAN	1940	TGALTVQJTTQLR	5 4 1 0 0
563	sp|P98160|PGBM_HUMAN	3072	NQELEDNVHISPJGSIITIVGTRPSNHGTYR	5 5 0 0 1		563	sp|Q14563|SEM3A_HUMAN	590	IIYGVEJSSTFLECSPK	4 5 0 0 0
564	sp|P98160|PGBM_HUMAN	3780	SLTQGSLIVGDLAPVJGTSQGK	5 4 1 0 1		564	sp|Q14563|SEM3A_HUMAN	590	IIYGVEJSSTFLECSPK	4 5 0 0 1
565	sp|P98160|PGBM_HUMAN	3836	IQGEEIVFHDLJLTAHGISHCPTCR	5 4 1 0 1		565	sp|Q14563|SEM3A_HUMAN	590	IIYGVEJSSTFLECSPK	4 5 1 0 0
566	sp|P98172|EFNB1_HUMAN	139	HHDYYITSTSJGSLEGLENR	5 4 2 0 1		566	sp|Q14563|SEM3A_HUMAN	590	IIYGVEJSSTFLECSPK	4 5 1 0 1
567	sp|Q01459|DIAC_HUMAN	299	QIJSSISGNLWDKDQR	5 2 0 0 0		567	sp|Q14563|SEM3A_HUMAN	590	IIYGVEJSSTFLECSPK	5 4 0 0 1
568	sp|Q02487|DSC2_HUMAN	392	AJYTILK	5 4 1 0 1		568	sp|Q14563|SEM3A_HUMAN	590	IIYGVEJSSTFLECSPK	5 4 1 0 0
569	sp|Q02742|GCNT1_HUMAN	58	HLELAGENPSSDIJCTK	6 3 1 0 0		569	sp|Q14563|SEM3A_HUMAN	590	IIYGVEJSSTFLECSPK	5 4 1 0 1
570	sp|Q02809|PLOD1_HUMAN	538	YIHQJYTK	4 5 0 0 1		570	sp|Q14563|SEM3A_HUMAN	590	IIYGVEJSSTFLECSPK	5 6 1 0 1
571	sp|Q02809|PLOD1_HUMAN	538	YIHQJYTK	5 2 0 0 0		571	sp|Q14563|SEM3A_HUMAN	590	IIYGVEJSSTFLECSPK	6 5 1 0 1
572	sp|Q02809|PLOD1_HUMAN	538	YIHQJYTK	5 4 0 0 1		572	sp|Q14766|LTBP1_HUMAN	347	YVQDQVAAPFQLSJHTGR	5 4 1 0 1
573	sp|Q02809|PLOD1_HUMAN	538	YIHQJYTK	5 4 1 0 0		573	sp|Q15262|PTPRK_HUMAN	140	GPLANPIWJVTGFTGR	6 2 0 0 0
574	sp|Q02809|PLOD1_HUMAN	538	YIHQJYTK	5 4 1 0 1		574	sp|Q15262|PTPRK_HUMAN	140	GPLANPIWJVTGFTGR	6 3 1 0 0
575	sp|Q02809|PLOD1_HUMAN	538	YIHQJYTK	5 4 2 0 1		575	sp|Q15262|PTPRK_HUMAN	140	GPLANPIWJVTGFTGR	7 2 0 0 0
576	sp|Q02809|PLOD1_HUMAN	538	YIHQJYTK	5 5 0 0 0		576	sp|Q15262|PTPRK_HUMAN	140	GPLANPIWJVTGFTGR	8 2 0 0 0
577	sp|Q02809|PLOD1_HUMAN	538	YIHQJYTK	5 5 0 0 1		577	sp|Q16787|LAMA3_HUMAN	2751	LJDTVGVTK	5 2 0 0 0
578	sp|Q03405|UPAR_HUMAN	184	GCGYLPGCPGSNGFHNJDTFHFLK	5 4 2 0 0		578	sp|Q29718|1B82_HUMAN/sp|P30464|1B15_HUMAN/sp|P30484|1B46_HUMAN/sp|Q9TNN7|1C05_HUMAN/sp|P30466|1B18_HUMAN/sp|P30475|1B39_HUMAN/sp|P30505|1C08_HUMAN/sp|P30501|1C02_HUMAN/sp|Q29836|1B67_HUMAN/sp|P30508|1C12_HUMAN	110/110/110/110/110/110/110/110/110/110	GYYJQSEAGSHTLQR	5 4 2 0 1
579	sp|Q03405|UPAR_HUMAN	184	GCGYLPGCPGSNGFHNJDTFHFLK	5 4 3 0 0		579	sp|Q29980|MICB_HUMAN	234	JITLTWR	5 4 1 0 1
580	sp|Q06481|APLP2_HUMAN	541	RJQSLSLLYK	5 4 2 0 1		580	sp|Q29983|MICA_HUMAN	210	TVPPMVJVTR	5 2 0 0 0
581	sp|Q07954|LRP1_HUMAN	1511	WTGHJVTVVQR	5 4 0 0 1		581	sp|Q32P28|P3H1_HUMAN	467	LLJGSQR	5 2 0 0 0
582	sp|Q07954|LRP1_HUMAN	1763	LYWISSGJHTIJR	5 2 0 0 0		582	sp|Q495W5|FUT11_HUMAN	166	LFJLTSTFSR	9 2 0 0 0
583	sp|Q07954|LRP1_HUMAN	1763	LYWISSGJHTIJR	6 2 0 0 0		583	sp|Q5VU97|CAHD1_HUMAN	905	FJTSLAGDLTNLVHGSHCSK	6 2 0 0 0
584	sp|Q07954|LRP1_HUMAN	1763	LYWISSGJHTIJR	7 2 0 0 0		584	sp|Q6EMK4|VASN_HUMAN	500	JLSGPDKR	5 2 0 0 0
585	sp|Q07954|LRP1_HUMAN	1825	JSTTLVMHMK	5 2 0 0 0		585	sp|Q6EMK4|VASN_HUMAN	500	JLSGPDKR	7 2 0 0 0
586	sp|Q07954|LRP1_HUMAN	1825	JSTTLVMHMK	6 2 0 0 0		586	sp|Q6EMK4|VASN_HUMAN	500	JLSGPDKR	8 2 0 0 0
587	sp|Q07954|LRP1_HUMAN	1825	JSTTLVMHMK	7 2 0 0 0		587	sp|Q6UW63|PLGT2_HUMAN	302	JSTAVWR	5 2 0 0 0
588	sp|Q08380|LG3BP_HUMAN	69	ALGFEJATQALGR	6 5 3 0 1		588	sp|Q6V0I7|FAT4_HUMAN	615	ATDGDLGDJGTVR	5 2 0 0 0
589	sp|Q08380|LG3BP_HUMAN	69	ALGFEJATQALGR	7 6 2 0 1		589	sp|Q6YHK3|CD109_HUMAN	118	TQDEILFSJSTR	5 4 1 0 1
590	sp|Q08380|LG3BP_HUMAN	69	ALGFEJATQALGR	7 6 3 0 1		590	sp|Q6YHK3|CD109_HUMAN	118	TQDEILFSJSTR	5 4 2 0 1
591	sp|Q08380|LG3BP_HUMAN	398	GLJLTEDTYKPR	7 6 2 0 1		591	sp|Q6YHK3|CD109_HUMAN	118	TQDEILFSJSTR	6 5 2 0 1
592	sp|Q08380|LG3BP_HUMAN	398	GLJLTEDTYKPR	7 6 4 0 1		592	sp|Q6YHK3|CD109_HUMAN	118	TQDEILFSJSTR	6 5 3 0 0
593	sp|Q08380|LG3BP_HUMAN	551	AAIPSALDTJSSK	5 3 0 0 1		593	sp|Q6YHK3|CD109_HUMAN	247	HLJGTITAK	1 2 0 0 0
594	sp|Q08380|LG3BP_HUMAN	551	AAIPSALDTJSSK	5 3 1 0 1		594	sp|Q6YHK3|CD109_HUMAN	247	HLJGTITAK	2 2 0 0 0
595	sp|Q08380|LG3BP_HUMAN	551	AAIPSALDTJSSK	5 4 0 0 1		595	sp|Q6YHK3|CD109_HUMAN	247	HLJGTITAK	3 2 0 0 0
596	sp|Q08380|LG3BP_HUMAN	551	AAIPSALDTJSSK	5 4 1 0 1		596	sp|Q6YHK3|CD109_HUMAN	247	HLJGTITAK	4 2 0 0 0
597	sp|Q08380|LG3BP_HUMAN	551	AAIPSALDTJSSK	5 4 1 0 4		597	sp|Q6YHK3|CD109_HUMAN	247	HLJGTITAK	5 2 0 0 0
598	sp|Q08380|LG3BP_HUMAN	551	AAIPSALDTJSSK	5 4 2 0 4		598	sp|Q6YHK3|CD109_HUMAN	247	HLJGTITAK	5 3 0 0 0
599	sp|Q08380|LG3BP_HUMAN	551	AAIPSALDTJSSK	6 2 0 0 0		599	sp|Q6YHK3|CD109_HUMAN	247	HLJGTITAK	5 3 1 0 0
600	sp|Q08380|LG3BP_HUMAN	551	AAIPSALDTJSSK	6 3 0 0 0		600	sp|Q6YHK3|CD109_HUMAN	247	HLJGTITAK	5 4 0 0 0
601	sp|Q08380|LG3BP_HUMAN	551	AAIPSALDTJSSK	6 3 0 0 1		601	sp|Q6YHK3|CD109_HUMAN	247	HLJGTITAK	6 2 0 0 0
602	sp|Q08380|LG3BP_HUMAN	551	AAIPSALDTJSSK	6 3 1 0 0		602	sp|Q6YHK3|CD109_HUMAN	247	HLJGTITAK	6 3 0 0 0
603	sp|Q08380|LG3BP_HUMAN	551	AAIPSALDTJSSK	6 5 0 0 1		603	sp|Q6YHK3|CD109_HUMAN	247	HLJGTITAK	6 3 1 0 0
604	sp|Q08380|LG3BP_HUMAN	551	AAIPSALDTJSSK	6 5 1 0 1		604	sp|Q6YHK3|CD109_HUMAN	247	HLJGTITAK	7 2 0 0 0
605	sp|Q08380|LG3BP_HUMAN	551	AAIPSALDTJSSK	6 5 2 0 1		605	sp|Q6YHK3|CD109_HUMAN	247	HLJGTITAK	8 2 0 0 0
606	sp|Q08380|LG3BP_HUMAN	551	AAIPSALDTJSSK	6 5 3 0 1		606	sp|Q6YHK3|CD109_HUMAN	337	JVSTNVFFK	5 2 0 0 0
607	sp|Q08380|LG3BP_HUMAN	551	AAIPSALDTJSSK	7 2 0 0 0		607	sp|Q6YHK3|CD109_HUMAN	337	JVSTNVFFK	6 2 0 0 0
608	sp|Q08380|LG3BP_HUMAN	551	AAIPSALDTJSSK	7 6 0 0 1		608	sp|Q6YHK3|CD109_HUMAN	337	JVSTNVFFK	7 2 0 0 0
609	sp|Q08380|LG3BP_HUMAN	551	AAIPSALDTJSSK	7 6 1 0 1		609	sp|Q6YHK3|CD109_HUMAN	337	JVSTNVFFK	8 2 0 0 0
610	sp|Q08380|LG3BP_HUMAN	551	AAIPSALDTJSSK	7 6 2 0 1		610	sp|Q6YHK3|CD109_HUMAN	337	JVSTNVFFK	9 2 0 0 0
611	sp|Q08380|LG3BP_HUMAN	551	AAIPSALDTJSSK	7 6 3 0 1		611	sp|Q6YHK3|CD109_HUMAN	419	IJYTVPQSGTFK	5 4 1 0 1
612	sp|Q08380|LG3BP_HUMAN	551	AAIPSALDTJSSK	8 2 0 0 0		612	sp|Q6YHK3|CD109_HUMAN	419	IJYTVPQSGTFK	6 5 2 0 1
613	sp|Q08380|LG3BP_HUMAN	551	AAIPSALDTJSSK	8 6 1 0 2		613	sp|Q6ZMP0|THSD4_HUMAN	441	IJITEMYK	5 2 0 0 0
614	sp|Q08380|LG3BP_HUMAN	580	TVIRPFYLTJSSGVD	5 4 2 0 1		614	sp|Q6ZNF0|ACP7_HUMAN	211	YJFSNYK	6 2 0 0 0
615	sp|Q08380|LG3BP_HUMAN	580	TVIRPFYLTJSSGVD	6 5 3 0 1		615	sp|Q6ZNF0|ACP7_HUMAN	211	YJFSNYK	7 2 0 0 0
616	sp|Q08380|LG3BP_HUMAN	580	TVIRPFYLTJSSGVD	7 6 4 0 1		616	sp|Q6ZNF0|ACP7_HUMAN	211	YJFSNYK	8 2 0 0 0
617	sp|Q08431|MFGM_HUMAN	325	VAYSJDSAJWTEYQDPR	5 4 1 0 1		617	sp|Q76FK4|NOL8_HUMAN	73	KCMSVLJK	5 2 0 0 0
618	sp|Q12866|MERTK_HUMAN	207	QPESMJVTR	4 5 0 0 1		618	sp|Q7Z3B1|NEGR1_HUMAN	73	GAWLJR	5 7 0 0 3
619	sp|Q12907|LMAN2_HUMAN	183	VFPYISVMVNJGSLSYDHSK	5 4 2 0 1		619	sp|Q7Z3B1|NEGR1_HUMAN	73	GAWLJR	6 2 0 0 0
620	sp|Q13308|PTK7_HUMAN	116	SAJASFNIK	5 4 2 0 1		620	sp|Q7Z3B1|NEGR1_HUMAN	73	GAWLJR	6 5 0 0 3
621	sp|Q13308|PTK7_HUMAN	175	DGTPLSDGQSJHTVSSK	5 4 2 0 1		621	sp|Q7Z3B1|NEGR1_HUMAN	73	GAWLJR	7 2 0 0 0
622	sp|Q13308|PTK7_HUMAN	175	DGTPLSDGQSJHTVSSK	6 5 3 0 1		622	sp|Q7Z7M0|MEGF8_HUMAN	421	VJSTELFHVDR	9 2 0 0 0
623	sp|Q13308|PTK7_HUMAN	405	RQDVJITVATVPSWLK	5 4 1 0 1		623	sp|Q7Z7M9|GALT5_HUMAN	395	IJITAK	5 2 0 0 0
624	sp|Q13308|PTK7_HUMAN	405	RQDVJITVATVPSWLK	5 4 2 0 1		624	sp|Q86SQ4|AGRG6_HUMAN	143	GFJASYIR	4 3 0 0 0
625	sp|Q13308|PTK7_HUMAN	405	RQDVJITVATVPSWLK	5 5 1 0 1		625	sp|Q86SQ4|AGRG6_HUMAN	143	GFJASYIR	5 2 0 0 0
626	sp|Q13308|PTK7_HUMAN	567	DDAGJYTCIASNGPQGQIR	5 4 1 0 1		626	sp|Q86SQ4|AGRG6_HUMAN	143	GFJASYIR	5 4 0 0 0
627	sp|Q13308|PTK7_HUMAN	567	DDAGJYTCIASNGPQGQIR	5 4 2 0 1		627	sp|Q86SQ4|AGRG6_HUMAN	143	GFJASYIR	5 4 1 0 0
628	sp|Q13308|PTK7_HUMAN	646	MHIFQJGSLVIHDVAPEDSGR	5 2 0 0 0		628	sp|Q86SQ4|AGRG6_HUMAN	143	GFJASYIR	5 5 0 0 0
629	sp|Q13308|PTK7_HUMAN	646	MHIFQJGSLVIHDVAPEDSGR	5 3 1 0 0		629	sp|Q86SQ4|AGRG6_HUMAN	143	GFJASYIR	7 2 0 0 0
630	sp|Q13332|PTPRS_HUMAN	733	KVEAEALJATAIR	4 5 0 0 1		630	sp|Q86SQ4|AGRG6_HUMAN	314	LWJFTMNAK	5 5 0 0 1
631	sp|Q13332|PTPRS_HUMAN	733	KVEAEALJATAIR	5 4 1 0 0		631	sp|Q86SQ4|AGRG6_HUMAN	314	LWJFTMNAK	5 5 1 0 1
632	sp|Q13332|PTPRS_HUMAN	733	KVEAEALJATAIR	5 4 1 0 1		632	sp|Q86SQ4|AGRG6_HUMAN	314	LWJFTMNAK	6 5 2 0 1
633	sp|Q13332|PTPRS_HUMAN	940	GHPQILEAAGJASAGTVLLR	5 4 2 0 1		633	sp|Q86SQ4|AGRG6_HUMAN	314	LWJFTMNAK	6 6 1 0 1
634	sp|Q13443|ADAM9_HUMAN	125	GYVEGVHJSSIALSDCFGLR	5 2 0 0 0		634	sp|Q86SQ4|AGRG6_HUMAN	324	ILSJLSCNVK	5 2 0 0 0
635	sp|Q13443|ADAM9_HUMAN	125	GYVEGVHJSSIALSDCFGLR	5 3 1 0 0		635	sp|Q86SQ4|AGRG6_HUMAN	324	ILSJLSCNVK	5 4 1 0 1
636	sp|Q13443|ADAM9_HUMAN	125	GYVEGVHJSSIALSDCFGLR	5 4 0 0 0		636	sp|Q86SQ4|AGRG6_HUMAN	324	ILSJLSCNVK	5 5 0 0 1
637	sp|Q13443|ADAM9_HUMAN	125	GYVEGVHJSSIALSDCFGLR	5 4 1 0 0		637	sp|Q86SQ4|AGRG6_HUMAN	324	ILSJLSCNVK	5 5 1 0 1
638	sp|Q13443|ADAM9_HUMAN	125	GYVEGVHJSSIALSDCFGLR	5 4 1 0 1		638	sp|Q86SQ4|AGRG6_HUMAN	324	ILSJLSCNVK	6 6 1 0 1
639	sp|Q13443|ADAM9_HUMAN	125	GYVEGVHJSSIALSDCFGLR	5 4 2 0 0		639	sp|Q86SQ4|AGRG6_HUMAN	324	ILSJLSCNVK	7 6 3 0 1
640	sp|Q13443|ADAM9_HUMAN	125	GYVEGVHJSSIALSDCFGLR	5 4 2 0 1		640	sp|Q86SQ4|AGRG6_HUMAN	750	AQFTFFJK	5 2 0 0 0
641	sp|Q13443|ADAM9_HUMAN	125	GYVEGVHJSSIALSDCFGLR	5 5 0 0 0		641	sp|Q86SQ4|AGRG6_HUMAN	750	AQFTFFJK	6 2 0 0 0
642	sp|Q13443|ADAM9_HUMAN	125	GYVEGVHJSSIALSDCFGLR	5 5 1 0 0		642	sp|Q86SQ4|AGRG6_HUMAN	750	AQFTFFJK	7 2 0 0 0
643	sp|Q13443|ADAM9_HUMAN	125	GYVEGVHJSSIALSDCFGLR	6 5 1 0 0		643	sp|Q86SQ4|AGRG6_HUMAN	750	AQFTFFJK	8 2 0 0 0
644	sp|Q13740|CD166_HUMAN	167	LGDCISEDSYPDGJITWYR	5 5 0 0 1		644	sp|Q86SQ4|AGRG6_HUMAN	750	RAQFTFFJK	8 2 0 0 0
645	sp|Q13740|CD166_HUMAN	361	JATVVWMK	6 5 3 0 1		645	sp|Q86SQ4|AGRG6_HUMAN	818	SFGGWJTSGCVAHR	5 2 0 0 0
646	sp|Q14118|DAG1_HUMAN	141	LGAJGSHIPQTSSVFSIEVYPEDHSELQSVR	5 4 2 0 1		646	sp|Q86SQ4|AGRG6_HUMAN	818	SFGGWJTSGCVAHR	6 2 0 0 0
647	sp|Q14126|DSG2_HUMAN	182	IJATDADEPNTLNSK	5 4 2 0 1		647	sp|Q86SQ4|AGRG6_HUMAN	818	SFGGWJTSGCVAHR	7 2 0 0 0
648	sp|Q14126|DSG2_HUMAN	182	IJATDADEPNTLNSK	5 5 0 0 1		648	sp|Q8IV08|PLD3_HUMAN	387	DJHTHSDIQVK	3 2 0 0 1
649	sp|Q14126|DSG2_HUMAN	462	YVQJGTYTVK	5 4 1 0 1		649	sp|Q8N2S1|LTBP4_HUMAN	352	VJGSCEDVDECATGGR	4 5 0 0 1
650	sp|Q14264|ENR1_HUMAN	105	EGDLLJQTK	5 2 0 0 0		650	sp|Q8N2S1|LTBP4_HUMAN	352	VJGSCEDVDECATGGR	4 5 1 0 1
651	sp|Q14517|FAT1_HUMAN	333	AIGGIDWDSHPFGYJLTLQAK	5 4 1 0 1		651	sp|Q8N2S1|LTBP4_HUMAN	352	VJGSCEDVDECATGGR	4 5 2 0 1
652	sp|Q14517|FAT1_HUMAN	2325	GISYQMFGJHSK	5 4 0 0 1		652	sp|Q8N2S1|LTBP4_HUMAN	1200	JVTWQECCCTVGEGWGSGCR	5 5 0 0 1
653	sp|Q14517|FAT1_HUMAN	3640	QVTQEMLJHTIAIR	5 4 1 0 0		653	sp|Q8N475|FSTL5_HUMAN	394	QLTLQAJGSEVHISNVR	5 4 1 0 1
654	sp|Q14563|SEM3A_HUMAN	590	IIYGVEJSSTFLECSPK	4 5 0 0 1		654	sp|Q8N475|FSTL5_HUMAN	394	QLTLQAJGSEVHISNVR	5 4 2 0 1
655	sp|Q14563|SEM3A_HUMAN	590	IIYGVEJSSTFLECSPK	6 5 1 0 1		655	sp|Q8NBJ4|GOLM1_HUMAN	109	AVLVNJITTGER	5 4 2 0 1
656	sp|Q14563|SEM3A_HUMAN	590	IIYGVEJSSTFLECSPK	6 5 2 0 1		656	sp|Q8NBJ4|GOLM1_HUMAN	144	JQTNLER	5 4 2 0 1
657	sp|Q14766|LTBP1_HUMAN	347	YVQDQVAAPFQLSJHTGR	4 5 0 0 1		657	sp|Q8ND07|BBOF1_HUMAN	104	QQLJETKEK	5 2 0 0 0
658	sp|Q14766|LTBP1_HUMAN	347	YVQDQVAAPFQLSJHTGR	5 4 2 0 1		658	sp|Q8WVQ1|CANT1_HUMAN	88	LGQAPANWYJDTYPLSPPQR	6 3 1 0 0
659	sp|Q15262|PTPRK_HUMAN	140	GPLANPIWJVTGFTGR	6 2 0 0 0		659	sp|Q92522|H1X_HUMAN	63	LGERJGSSLAK	2 2 0 0 1
660	sp|Q15262|PTPRK_HUMAN	140	GPLANPIWJVTGFTGR	7 2 0 0 0		660	sp|Q92522|H1X_HUMAN	63	LGERJGSSLAK	4 2 0 0 0
661	sp|Q15262|PTPRK_HUMAN	140	GPLANPIWJVTGFTGR	8 2 0 0 0		661	sp|Q92673|SORL_HUMAN	1733	GIGJWSDSK	5 2 0 0 0
662	sp|Q16769|QPCT_HUMAN	49	NYHQPAILJSSALR	5 4 2 0 1		662	sp|Q92673|SORL_HUMAN	1894	SLTTSLHJK	5 2 0 0 0
663	sp|Q29718|1B82_HUMAN/sp|P30464|1B15_HUMAN/sp|P30484|1B46_HUMAN/sp|Q9TNN7|1C05_HUMAN/sp|P30466|1B18_HUMAN/sp|P30475|1B39_HUMAN/sp|P30505|1C08_HUMAN/sp|P30501|1C02_HUMAN/sp|Q29836|1B67_HUMAN/sp|P30508|1C12_HUMAN	110/110/110/110/110/110/110/110/110/110	GYYJQSEAGSHTLQR	5 4 1 0 1		663	sp|Q92673|SORL_HUMAN	1894	SLTTSLHJK	7 2 0 0 0
664	sp|Q29718|1B82_HUMAN/sp|P30464|1B15_HUMAN/sp|P30484|1B46_HUMAN/sp|Q9TNN7|1C05_HUMAN/sp|P30466|1B18_HUMAN/sp|P30475|1B39_HUMAN/sp|P30505|1C08_HUMAN/sp|P30501|1C02_HUMAN/sp|Q29836|1B67_HUMAN/sp|P30508|1C12_HUMAN	110/110/110/110/110/110/110/110/110/110	GYYJQSEAGSHTLQR	5 4 2 0 1		664	sp|Q92820|GGH_HUMAN	203	JFTMNEK	5 2 0 0 0
665	sp|Q29980|MICB_HUMAN	164	AQTLAMJVTNFWK	5 4 2 0 1		665	sp|Q92820|GGH_HUMAN	203	JFTMNEK	5 3 1 0 0
666	sp|Q29983|MICA_HUMAN	210	TVPPMVJVTR	5 2 0 0 0		666	sp|Q92820|GGH_HUMAN	203	JFTMNEK	5 4 2 0 1
667	sp|Q495W5|FUT11_HUMAN	166	LFJLTSTFSR	9 2 0 0 0		667	sp|Q92820|GGH_HUMAN	203	JFTMNEK	6 2 0 0 0
668	sp|Q5H9T9|FSCB_HUMAN	33	IGJTSGSKGSYSAK	3 3 0 0 0		668	sp|Q92823|NRCAM_HUMAN	223	FJHTQTIQQK	4 3 0 0 1
669	sp|Q5VU97|CAHD1_HUMAN	905	FJTSLAGDLTNLVHGSHCSK	6 2 0 0 0		669	sp|Q92823|NRCAM_HUMAN	223	FJHTQTIQQK	4 3 1 0 1
670	sp|Q6EMK4|VASN_HUMAN	500	JLSGPDKR	8 2 0 0 0		670	sp|Q92823|NRCAM_HUMAN	223	FJHTQTIQQK	5 2 0 0 0
671	sp|Q6YHK3|CD109_HUMAN	41	FLVTAPGIIRPGGJVTIGVELLEHCPSQVTVK	5 4 1 0 0		671	sp|Q92823|NRCAM_HUMAN	223	FJHTQTIQQK	5 3 0 0 0
672	sp|Q6YHK3|CD109_HUMAN	41	FLVTAPGIIRPGGJVTIGVELLEHCPSQVTVK	5 4 2 0 0		672	sp|Q92823|NRCAM_HUMAN	223	FJHTQTIQQK	5 3 0 0 1
673	sp|Q6YHK3|CD109_HUMAN	41	PGGJVTIGVELLEHCPSQVTVK	5 4 1 0 0		673	sp|Q92823|NRCAM_HUMAN	223	FJHTQTIQQK	5 4 0 0 1
674	sp|Q6YHK3|CD109_HUMAN	118	TQDEILFSJSTR	5 4 1 0 1		674	sp|Q92823|NRCAM_HUMAN	223	FJHTQTIQQK	5 4 1 0 1
675	sp|Q6YHK3|CD109_HUMAN	118	TQDEILFSJSTR	6 5 2 0 0		675	sp|Q92823|NRCAM_HUMAN	223	FJHTQTIQQK	6 2 0 0 0
676	sp|Q6YHK3|CD109_HUMAN	118	TQDEILFSJSTR	6 5 2 0 1		676	sp|Q92823|NRCAM_HUMAN	223	FJHTQTIQQK	6 3 0 0 0
677	sp|Q6YHK3|CD109_HUMAN	118	TQDEILFSJSTR	6 5 3 0 0		677	sp|Q92823|NRCAM_HUMAN	223	FJHTQTIQQK	7 2 0 0 0
678	sp|Q6YHK3|CD109_HUMAN	118	TQDEILFSJSTR	6 5 3 0 1		678	sp|Q92823|NRCAM_HUMAN	223	FJHTQTIQQK	8 2 0 0 0
679	sp|Q6YHK3|CD109_HUMAN	118	TQDEILFSJSTR	8 7 1 0 0		679	sp|Q92823|NRCAM_HUMAN	858	VNVVJSTLAEVHWDPVPLK	5 4 0 0 1
680	sp|Q6YHK3|CD109_HUMAN	247	HLJGTITAK	1 2 0 0 0		680	sp|Q92823|NRCAM_HUMAN	858	VNVVJSTLAEVHWDPVPLK	5 4 2 0 1
681	sp|Q6YHK3|CD109_HUMAN	247	HLJGTITAK	2 2 0 0 0		681	sp|Q92823|NRCAM_HUMAN	993	YQPIJSTHELGPLVDLK	5 4 2 0 1
682	sp|Q6YHK3|CD109_HUMAN	247	HLJGTITAK	3 2 0 0 0		682	sp|Q92823|NRCAM_HUMAN	1019	NLJFSTR	4 5 2 0 0
683	sp|Q6YHK3|CD109_HUMAN	247	HLJGTITAK	4 2 0 0 0		683	sp|Q92823|NRCAM_HUMAN	1019	NLJFSTR	5 2 0 0 0
684	sp|Q6YHK3|CD109_HUMAN	247	HLJGTITAK	5 2 0 0 0		684	sp|Q92854|SEM4D_HUMAN	191	JSSHSPLR	8 2 0 0 0
685	sp|Q6YHK3|CD109_HUMAN	247	HLJGTITAK	5 3 0 0 0		685	sp|Q92854|SEM4D_HUMAN	419	DVJYTQIVVDR	6 2 0 0 0
686	sp|Q6YHK3|CD109_HUMAN	247	HLJGTITAK	5 3 1 0 0		686	sp|Q92854|SEM4D_HUMAN	419	DVJYTQIVVDR	7 2 0 0 0
687	sp|Q6YHK3|CD109_HUMAN	247	HLJGTITAK	5 4 0 0 0		687	sp|Q92954|PRG4_HUMAN	1159	JGTLVAFR	5 2 0 0 0
688	sp|Q6YHK3|CD109_HUMAN	247	HLJGTITAK	5 4 1 0 0		688	sp|Q92954|PRG4_HUMAN	1159	JGTLVAFR	6 2 0 0 0
689	sp|Q6YHK3|CD109_HUMAN	247	HLJGTITAK	6 2 0 0 0		689	sp|Q96AY3|FKB10_HUMAN	70	YHYJGTFEDGK	5 2 0 0 0
690	sp|Q6YHK3|CD109_HUMAN	247	HLJGTITAK	6 3 0 0 0		690	sp|Q96HE7|ERO1A_HUMAN	280	WGHJITEFQQR	5 2 0 0 0
691	sp|Q6YHK3|CD109_HUMAN	247	HLJGTITAK	6 3 1 0 0		691	sp|Q96L58|B3GT6_HUMAN	131	DAYEJLTAK	6 2 0 0 0
692	sp|Q6YHK3|CD109_HUMAN	247	HLJGTITAK	7 2 0 0 0		692	sp|Q99538|LGMN_HUMAN	167	DLJETIHYMYK	5 2 0 0 0
693	sp|Q6YHK3|CD109_HUMAN	247	HLJGTITAK	8 2 0 0 0		693	sp|Q99538|LGMN_HUMAN	167	DLJETIHYMYK	6 2 0 0 0
694	sp|Q6YHK3|CD109_HUMAN	279	KKJITK	4 2 0 0 0		694	sp|Q99985|SEM3C_HUMAN	123	VIQTFJR	5 2 0 0 0
695	sp|Q6YHK3|CD109_HUMAN	279	KKJITK	4 3 0 0 0		695	sp|Q99985|SEM3C_HUMAN	123	VIQTFJR	5 3 1 0 0
696	sp|Q6YHK3|CD109_HUMAN	279	KKJITK	5 2 0 0 0		696	sp|Q99985|SEM3C_HUMAN	123	VIQTFJR	6 2 0 0 0
697	sp|Q6YHK3|CD109_HUMAN	279	KKJITK	5 3 0 0 0		697	sp|Q99985|SEM3C_HUMAN	123	VIQTFJR	6 3 1 0 0
698	sp|Q6YHK3|CD109_HUMAN	279	KKJITK	5 4 0 0 0		698	sp|Q99985|SEM3C_HUMAN	123	VIQTFJR	7 2 0 0 0
699	sp|Q6YHK3|CD109_HUMAN	279	KKJITK	6 2 0 0 0		699	sp|Q99985|SEM3C_HUMAN	268	ICPJDTGGLR	5 2 0 0 0
700	sp|Q6YHK3|CD109_HUMAN	279	KKJITK	6 3 0 0 0		700	sp|Q99985|SEM3C_HUMAN	268	ICPJDTGGLR	6 2 0 0 0
701	sp|Q6YHK3|CD109_HUMAN	279	KKJITK	7 2 0 0 0		701	sp|Q99985|SEM3C_HUMAN	268	ICPJDTGGLR	7 2 0 0 0
702	sp|Q6YHK3|CD109_HUMAN	291	IJGSAJFSFNDEEMK	5 2 0 0 0		702	sp|Q99985|SEM3C_HUMAN	268	ICPJDTGGLR	8 2 0 0 0
703	sp|Q6YHK3|CD109_HUMAN	291	IJGSAJFSFNDEEMK	7 2 0 0 0		703	sp|Q99985|SEM3C_HUMAN	585	JJTTFLECAPK	4 5 0 0 1
704	sp|Q6YHK3|CD109_HUMAN	291	IJGSAJFSFNDEEMK	8 2 0 0 0		704	sp|Q99985|SEM3C_HUMAN	585	JJTTFLECAPK	4 5 1 0 1
705	sp|Q6YHK3|CD109_HUMAN	337	JVSTNVFFK	12 2 0 0 0		705	sp|Q99985|SEM3C_HUMAN	585	JJTTFLECAPK	5 4 0 0 0
706	sp|Q6YHK3|CD109_HUMAN	337	JVSTNVFFK	5 2 0 0 0		706	sp|Q99985|SEM3C_HUMAN	585	JJTTFLECAPK	5 4 0 0 1
707	sp|Q6YHK3|CD109_HUMAN	337	JVSTNVFFK	6 2 0 0 0		707	sp|Q99985|SEM3C_HUMAN	585	JJTTFLECAPK	6 2 0 0 0
708	sp|Q6YHK3|CD109_HUMAN	337	JVSTNVFFK	7 2 0 0 0		708	sp|Q99985|SEM3C_HUMAN	585	JJTTFLECAPK	7 2 0 0 0
709	sp|Q6YHK3|CD109_HUMAN	337	JVSTNVFFK	8 2 0 0 0		709	sp|Q99985|SEM3C_HUMAN	586	JJTTFLECAPK	5 2 0 0 0
710	sp|Q6YHK3|CD109_HUMAN	337	JVSTNVFFK	9 2 0 0 0		710	sp|Q99985|SEM3C_HUMAN	586	JJTTFLECAPK	6 2 0 0 0
711	sp|Q6YHK3|CD109_HUMAN	419	IJYTVPQSGTFK	6 5 2 0 1		711	sp|Q99985|SEM3C_HUMAN	586	JJTTFLECAPK	8 2 0 0 0
712	sp|Q6YHK3|CD109_HUMAN	419	IJYTVPQSGTFK	6 5 3 0 1		712	sp|Q9C0C4|SEM4C_HUMAN	419	GTJFTHLVADR	8 2 0 0 0
713	sp|Q6YHK3|CD109_HUMAN	419	IJYTVPQSGTFK	6 6 1 0 1		713	sp|Q9C0C4|SEM4C_HUMAN	522	DPYCAWSVJTSR	5 4 2 0 1
714	sp|Q6YHK3|CD109_HUMAN	1086	GISDJYTLALITYALSSVGSPK	5 3 1 0 0		714	sp|Q9H330|TM245_HUMAN	551	VJNTAVIEK	5 2 0 0 0
715	sp|Q6YHK3|CD109_HUMAN	1086	GISDJYTLALITYALSSVGSPK	6 2 0 0 0		715	sp|Q9H5V8|CDCP1_HUMAN	39	ESJITVLIK	5 4 2 0 0
716	sp|Q6YHK3|CD109_HUMAN	1086	GISDJYTLALITYALSSVGSPK	6 3 1 0 0		716	sp|Q9H5V8|CDCP1_HUMAN	39	ESJITVLIK	6 2 0 0 0
717	sp|Q6YHK3|CD109_HUMAN	1355	LNLYLDSVJETQFCVNIPAVR	5 4 1 0 1		717	sp|Q9H5V8|CDCP1_HUMAN	39	ESJITVLIK	8 2 0 0 0
718	sp|Q6ZNF0|ACP7_HUMAN	211	YJFSNYK	7 2 0 0 0		718	sp|Q9H5V8|CDCP1_HUMAN	386	TCSSJLTLTSGSK	5 4 0 0 1
719	sp|Q6ZNF0|ACP7_HUMAN	211	YJFSNYK	8 2 0 0 0		719	sp|Q9H5V8|CDCP1_HUMAN	512	QJISVTLR	5 2 0 0 0
720	sp|Q7Z7M0|MEGF8_HUMAN	421	VJSTELFHVDR	9 2 0 0 0		720	sp|Q9H5V8|CDCP1_HUMAN	512	QJISVTLR	7 2 0 0 0
721	sp|Q86SQ4|AGRG6_HUMAN	143	GFJASYIR	5 2 0 0 0		721	sp|Q9H5V8|CDCP1_HUMAN	512	QJISVTLR	8 2 0 0 0
722	sp|Q86SQ4|AGRG6_HUMAN	143	GFJASYIR	5 4 1 0 0		722	sp|Q9NPR2|SEM4B_HUMAN	64	FEAEHISJYTALLLSR	6 2 0 0 0
723	sp|Q86SQ4|AGRG6_HUMAN	143	KGFJASYIR	5 4 1 0 0		723	sp|Q9NRA1|PDGFC_HUMAN	55	IITVSTJGSIHSPR	5 4 2 0 1
724	sp|Q86SQ4|AGRG6_HUMAN	143	KGFJASYIR	6 5 2 0 0		724	sp|Q9NRA1|PDGFC_HUMAN	254	JFSVSIR	5 2 0 0 0
725	sp|Q86SQ4|AGRG6_HUMAN	314	LWJFTMNAK	5 4 1 0 1		725	sp|Q9NRA1|PDGFC_HUMAN	254	JFSVSIR	6 2 0 0 0
726	sp|Q86SQ4|AGRG6_HUMAN	314	LWJFTMNAK	5 5 0 0 1		726	sp|Q9NRA1|PDGFC_HUMAN	254	JFSVSIR	7 2 0 0 0
727	sp|Q86SQ4|AGRG6_HUMAN	314	LWJFTMNAK	6 5 2 0 1		727	sp|Q9NRA1|PDGFC_HUMAN	254	JFSVSIR	8 2 0 0 0
728	sp|Q86SQ4|AGRG6_HUMAN	314	LWJFTMNAK	6 5 3 0 1		728	sp|Q9NRA1|PDGFC_HUMAN	254	JFSVSIR	9 2 0 0 0
729	sp|Q86SQ4|AGRG6_HUMAN	314	LWJFTMNAK	6 6 1 0 1		729	sp|Q9NY97|B3GN2_HUMAN	219	DTFFJLSLK	8 2 0 0 0
730	sp|Q86SQ4|AGRG6_HUMAN	314	LWJFTMNAK	7 6 2 0 1		730	sp|Q9NY97|B3GN2_HUMAN	219	DTFFJLSLK	9 2 0 0 0
731	sp|Q86SQ4|AGRG6_HUMAN	314	LWJFTMNAK	7 6 3 0 1		731	sp|Q9NYQ6|CELR1_HUMAN	1623	JLSVDGK	9 2 0 0 0
732	sp|Q86SQ4|AGRG6_HUMAN	324	ILSJLSCNVK	5 5 0 0 1		732	sp|Q9UBG0|MRC2_HUMAN	69	VTPACJTSLPAQR	5 4 1 0 1
733	sp|Q86SQ4|AGRG6_HUMAN	324	ILSJLSCNVK	6 6 1 0 1		733	sp|Q9UBG0|MRC2_HUMAN	634	JCTSFR	5 4 0 0 1
734	sp|Q86SQ4|AGRG6_HUMAN	324	ILSJLSCNVK	6 6 2 0 1		734	sp|Q9UHN6|CEIP2_HUMAN	914	NJISLVK	5 2 0 0 0
735	sp|Q86SQ4|AGRG6_HUMAN	324	ILSJLSCNVK	7 6 2 0 1		735	sp|Q9UHN6|CEIP2_HUMAN	1299	QLJISHLLVPLGLAK	5 4 1 0 1
736	sp|Q86SQ4|AGRG6_HUMAN	750	AQFTFFJK	8 2 0 0 0		736	sp|Q9ULF5|S39AA_HUMAN	339	DLNEDDHHHECLJVTQLLK	5 4 1 0 1
737	sp|Q86SQ4|AGRG6_HUMAN	818	SFGGWJTSGCVAHR	6 2 0 0 0		737	sp|Q9UMF0|ICAM5_HUMAN	214	AELDLRPHGLGLFEJSSAPR	6 2 0 0 0
738	sp|Q8IV08|PLD3_HUMAN	387	DJHTHSDIQVK	3 2 0 0 1		738	sp|Q9UMF0|ICAM5_HUMAN	646	VLAPGIYVCJATNR	5 4 1 0 1
739	sp|Q8N2S1|LTBP4_HUMAN	352	VJGSCEDVDECATGGR	4 5 0 0 1		739	sp|Q9Y4L1|HYOU1_HUMAN	515	VFGSQJLTTVK	5 2 0 0 0
740	sp|Q8N2S1|LTBP4_HUMAN	352	VJGSCEDVDECATGGR	4 5 2 0 1		740	sp|Q9Y4L1|HYOU1_HUMAN	515	VFGSQJLTTVK	5 4 1 0 0
741	sp|Q8N2S1|LTBP4_HUMAN	352	VJGSCEDVDECATGGR	5 4 2 0 1		741	sp|Q9Y4L1|HYOU1_HUMAN	515	VFGSQJLTTVK	5 4 2 0 0
742	sp|Q8N2S1|LTBP4_HUMAN	1200	JVTWQECCCTVGEGWGSGCR	4 5 0 0 1		742	sp|Q9Y4L1|HYOU1_HUMAN	862	VIJETWAWK	5 2 0 0 0
743	sp|Q8N2S1|LTBP4_HUMAN	1200	JVTWQECCCTVGEGWGSGCR	5 4 0 0 1		743	sp|Q9Y4L1|HYOU1_HUMAN	862	VIJETWAWK	5 4 1 0 1
744	sp|Q8N2S1|LTBP4_HUMAN	1200	JVTWQECCCTVGEGWGSGCR	5 5 0 0 1		744	sp|Q9Y4L1|HYOU1_HUMAN	862	VIJETWAWK	5 5 0 0 1
745	sp|Q8N475|FSTL5_HUMAN	394	QLTLQAJGSEVHISNVR	4 5 0 0 1		745	sp|Q9Y4L1|HYOU1_HUMAN	862	VIJETWAWK	5 5 1 0 1
746	sp|Q8N475|FSTL5_HUMAN	394	QLTLQAJGSEVHISNVR	4 5 1 0 1		746	sp|Q9Y4L1|HYOU1_HUMAN	869	JATLAEQAK	4 5 0 0 1
747	sp|Q8N475|FSTL5_HUMAN	394	QLTLQAJGSEVHISNVR	5 4 1 0 0		747	sp|Q9Y4L1|HYOU1_HUMAN	869	JATLAEQAK	5 2 0 0 0
748	sp|Q8N475|FSTL5_HUMAN	394	QLTLQAJGSEVHISNVR	5 4 1 0 1		748	sp|Q9Y4L1|HYOU1_HUMAN	869	JATLAEQAK	5 4 1 0 1
749	sp|Q8N475|FSTL5_HUMAN	394	QLTLQAJGSEVHISNVR	5 4 2 0 1		749	sp|Q9Y4L1|HYOU1_HUMAN	869	JATLAEQAK	5 5 0 0 1
750	sp|Q8N475|FSTL5_HUMAN	394	QLTLQAJGSEVHISNVR	5 5 0 0 1		750	sp|Q9Y4L1|HYOU1_HUMAN	869	JATLAEQAK	6 2 0 0 0
751	sp|Q8N475|FSTL5_HUMAN	394	QLTLQAJGSEVHISNVR	5 5 1 0 1		751	sp|Q9Y4L1|HYOU1_HUMAN	869	JATLAEQAK	7 2 0 0 0
752	sp|Q8NBJ4|GOLM1_HUMAN	144	LQQDVLQFQKJQTNLER	4 5 2 0 1		752	sp|Q9Y4L1|HYOU1_HUMAN	869	JATLAEQAK	8 2 0 0 0
753	sp|Q8NBJ4|GOLM1_HUMAN	144	LQQDVLQFQKJQTNLER	5 4 1 0 1		753	sp|Q9Y4L1|HYOU1_HUMAN	931	AEPPLJASASDQGEK	5 2 0 0 0
754	sp|Q8NBJ4|GOLM1_HUMAN	144	LQQDVLQFQKJQTNLER	5 4 2 0 1		754	sp|Q9Y6N7|ROBO1_HUMAN	820	VWCLGJETR	5 2 0 0 0
755	sp|Q8NBJ4|GOLM1_HUMAN	144	LQQDVLQFQKJQTNLER	5 5 1 0 1		[a] Peptide sequence with ‘J’ indicating the N-glycosylation site.
756	sp|Q8NBJ4|GOLM1_HUMAN	144	LQQDVLQFQKJQTNLER	6 5 1 0 1
757	sp|Q8NBJ4|GOLM1_HUMAN	144	LQQDVLQFQKJQTNLER	6 5 2 0 1
758	sp|Q8NES3|LFNG_HUMAN	167	HTGNVVITJCSAAHSR	4 5 2 0 1
759	sp|Q8NES3|LFNG_HUMAN	167	HTGNVVITJCSAAHSR	5 4 2 0 1
760	sp|Q8WVQ1|CANT1_HUMAN	88	LGQAPANWYJDTYPLSPPQR	6 3 1 0 0
761	sp|Q92542|NICA_HUMAN	530	AJNSWFQSILR	9 2 0 0 0
762	sp|Q92673|SORL_HUMAN	1608	TLETHSJK	5 2 0 0 0
763	sp|Q92673|SORL_HUMAN	1733	GIGJWSDSK	8 2 0 0 0
764	sp|Q92673|SORL_HUMAN	1894	SLTTSLHJK	5 2 0 0 0
765	sp|Q92673|SORL_HUMAN	1894	SLTTSLHJK	7 2 0 0 0
766	sp|Q92673|SORL_HUMAN	2010	YHIIVQLGJMSK	9 2 0 0 0
767	sp|Q92820|GGH_HUMAN	203	JFTMNEK	5 2 0 0 0
768	sp|Q92820|GGH_HUMAN	203	JFTMNEK	5 3 1 0 0
769	sp|Q92820|GGH_HUMAN	203	JFTMNEK	5 3 1 0 1
770	sp|Q92820|GGH_HUMAN	203	JFTMNEK	5 4 2 0 1
771	sp|Q92820|GGH_HUMAN	203	JFTMNEK	6 2 0 0 0
772	sp|Q92820|GGH_HUMAN	203	JFTMNEK	6 3 1 0 0
773	sp|Q92823|NRCAM_HUMAN	83	JGTHFDIDKDPLVTMKPGTGTLIINIMSEGK	5 2 0 0 0
774	sp|Q92823|NRCAM_HUMAN	83	JGTHFDIDKDPLVTMKPGTGTLIINIMSEGK	5 3 1 0 0
775	sp|Q92823|NRCAM_HUMAN	83	JGTHFDIDKDPLVTMKPGTGTLIINIMSEGK	5 4 0 0 1
776	sp|Q92823|NRCAM_HUMAN	83	JGTHFDIDKDPLVTMKPGTGTLIINIMSEGK	6 3 1 0 0
777	sp|Q92823|NRCAM_HUMAN	223	FJHTQTIQQK	4 3 0 0 0
778	sp|Q92823|NRCAM_HUMAN	223	FJHTQTIQQK	4 3 0 0 1
779	sp|Q92823|NRCAM_HUMAN	223	FJHTQTIQQK	5 2 0 0 0
780	sp|Q92823|NRCAM_HUMAN	223	FJHTQTIQQK	5 3 0 0 0
781	sp|Q92823|NRCAM_HUMAN	223	FJHTQTIQQK	5 3 0 0 1
782	sp|Q92823|NRCAM_HUMAN	223	FJHTQTIQQK	5 4 0 0 1
783	sp|Q92823|NRCAM_HUMAN	223	FJHTQTIQQK	5 4 1 0 1
784	sp|Q92823|NRCAM_HUMAN	223	FJHTQTIQQK	5 4 2 0 1
785	sp|Q92823|NRCAM_HUMAN	223	FJHTQTIQQK	6 2 0 0 0
786	sp|Q92823|NRCAM_HUMAN	223	FJHTQTIQQK	8 2 0 0 0
787	sp|Q92823|NRCAM_HUMAN	507	GSALHEDIYVLHEJGTLEIPVAQK	5 2 0 0 0
788	sp|Q92823|NRCAM_HUMAN	507	GSALHEDIYVLHEJGTLEIPVAQK	6 2 0 0 0
789	sp|Q92823|NRCAM_HUMAN	507	GSALHEDIYVLHEJGTLEIPVAQK	6 3 0 0 0
790	sp|Q92823|NRCAM_HUMAN	507	GSALHEDIYVLHEJGTLEIPVAQK	7 2 0 0 0
791	sp|Q92823|NRCAM_HUMAN	507	GSALHEDIYVLHEJGTLEIPVAQK	8 2 0 0 0
792	sp|Q92823|NRCAM_HUMAN	802	QKDGDDEWTSVVVAJVSK	5 4 2 0 1
793	sp|Q92823|NRCAM_HUMAN	858	VNVVJSTLAEVHWDPVPLK	5 4 0 0 1
794	sp|Q92823|NRCAM_HUMAN	858	VNVVJSTLAEVHWDPVPLK	5 4 1 0 1
795	sp|Q92823|NRCAM_HUMAN	858	VNVVJSTLAEVHWDPVPLK	5 4 2 0 1
796	sp|Q92823|NRCAM_HUMAN	993	YQPIJSTHELGPLVDLK	5 4 2 0 1
797	sp|Q92823|NRCAM_HUMAN	1019	NLJFSTR	5 2 0 0 0
798	sp|Q92854|SEM4D_HUMAN	191	JSSHSPLR	8 2 0 0 0
799	sp|Q92854|SEM4D_HUMAN	419	DVJYTQIVVDR	6 2 0 0 0
800	sp|Q92954|PRG4_HUMAN	1159	JGTLVAFR	6 2 0 0 0
801	sp|Q92994|TF3B_HUMAN	539	IJYSVLRGLSSAGGGSPHR	3 6 0 0 0
802	sp|Q96AY3|FKB10_HUMAN	70	YHYJGTFEDGK	5 2 0 0 0
803	sp|Q96AY3|FKB10_HUMAN	70	YHYJGTFEDGKK	5 2 0 0 0
804	sp|Q96HE7|ERO1A_HUMAN	280	WGHJITEFQQR	5 2 0 0 0
805	sp|Q96PD2|DCBD2_HUMAN	272	GIPYYESSLANJVTSVVGHLSTSLFTFK	8 2 0 0 0
806	sp|Q99523|SORT_HUMAN	406	HLYTTTGGETDFTJVTSLR	10 2 0 0 0
807	sp|Q99538|LGMN_HUMAN	167	DLJETIHYMYK	6 2 0 0 0
808	sp|Q99985|SEM3C_HUMAN	81	DHILSLNINJISQEALSVFWPASTIK	3 6 0 0 0
809	sp|Q99985|SEM3C_HUMAN	123	VIQTFJR	5 2 0 0 0
810	sp|Q99985|SEM3C_HUMAN	123	VIQTFJR	6 2 0 0 0
811	sp|Q99985|SEM3C_HUMAN	123	VIQTFJR	6 3 1 0 0
812	sp|Q99985|SEM3C_HUMAN	123	VIQTFJR	7 2 0 0 0
813	sp|Q99985|SEM3C_HUMAN	268	ICPJDTGGLR	5 2 0 0 0
814	sp|Q99985|SEM3C_HUMAN	268	ICPJDTGGLR	6 2 0 0 0
815	sp|Q99985|SEM3C_HUMAN	268	ICPJDTGGLR	7 2 0 0 0
816	sp|Q99985|SEM3C_HUMAN	268	ICPJDTGGLR	8 2 0 0 0
817	sp|Q99985|SEM3C_HUMAN	585	JJTTFLECAPK	5 2 0 0 0
818	sp|Q99985|SEM3C_HUMAN	585	JJTTFLECAPK	6 2 0 0 0
819	sp|Q99985|SEM3C_HUMAN	585	JJTTFLECAPK	7 2 0 0 0
820	sp|Q99985|SEM3C_HUMAN	585	JJTTFLECAPK	8 2 0 0 0
821	sp|Q99985|SEM3C_HUMAN	586	JJTTFLECAPK	5 2 0 0 0
822	sp|Q99985|SEM3C_HUMAN	586	JJTTFLECAPK	8 2 0 0 0
823	sp|Q9BTY2|FUCO2_HUMAN	377	SQJDTVTPDVWYTSKPK	5 4 2 0 1
824	sp|Q9BY76|ANGL4_HUMAN	177	LPEMAQPVDPAHJVSR	3 6 0 0 1
825	sp|Q9BY76|ANGL4_HUMAN	177	LPEMAQPVDPAHJVSR	3 6 0 0 2
826	sp|Q9BZM5|ULBP2_HUMAN/sp|Q5VY80|ULBP6_HUMAN	68/68	TFLHYDCGJK	5 4 1 0 1
827	sp|Q9BZR6|RTN4R_HUMAN	179	DLGJLTHLFLHGNR	5 4 2 0 1
828	sp|Q9C0C4|SEM4C_HUMAN	419	GTJFTHLVADR	6 2 0 0 0
829	sp|Q9C0C4|SEM4C_HUMAN	419	GTJFTHLVADR	8 2 0 0 0
830	sp|Q9C0C4|SEM4C_HUMAN	419	GTJFTHLVADR	9 2 0 0 0
831	sp|Q9C0C4|SEM4C_HUMAN	419	KGTJFTHLVADR	8 2 0 0 0
832	sp|Q9H5V8|CDCP1_HUMAN	386	TCSSJLTLTSGSK	5 4 0 0 1
833	sp|Q9H5V8|CDCP1_HUMAN	386	TCSSJLTLTSGSK	5 4 1 0 1
834	sp|Q9H5V8|CDCP1_HUMAN	512	QJISVTLR	5 2 0 0 0
835	sp|Q9H5V8|CDCP1_HUMAN	512	QJISVTLR	6 2 0 0 0
836	sp|Q9H5V8|CDCP1_HUMAN	512	QJISVTLR	7 4 1 0 2
837	sp|Q9H5V8|CDCP1_HUMAN	512	QJISVTLR	8 2 0 0 0
838	sp|Q9HAT2|SIAE_HUMAN	267	HSVLWNAMIHPLCJMTLK	8 2 0 0 0
839	sp|Q9HAT2|SIAE_HUMAN	267	HSVLWNAMIHPLCJMTLK	9 2 0 0 0
840	sp|Q9NPR2|SEM4B_HUMAN	64	FEAEHISJYTALLLSR	4 5 2 0 0
841	sp|Q9NPR2|SEM4B_HUMAN	64	FEAEHISJYTALLLSR	6 2 0 0 0
842	sp|Q9NPR2|SEM4B_HUMAN	64	FEAEHISJYTALLLSR	7 2 0 0 0
843	sp|Q9NPR2|SEM4B_HUMAN	64	FEAEHISJYTALLLSR	8 2 0 0 0
844	sp|Q9NPR2|SEM4B_HUMAN	405	KIJSSLQLPDR	6 5 3 0 1
845	sp|Q9NPR2|SEM4B_HUMAN	520	GLLYAASHSGVVQVPMAJCSLYR	6 2 0 0 0
846	sp|Q9NPR2|SEM4B_HUMAN	520	GLLYAASHSGVVQVPMAJCSLYR	8 2 0 0 0
847	sp|Q9NRA1|PDGFC_HUMAN	55	IITVSTJGSIHSPR	5 4 1 0 1
848	sp|Q9NRA1|PDGFC_HUMAN	55	IITVSTJGSIHSPR	5 4 2 0 1
849	sp|Q9NRA1|PDGFC_HUMAN	55	IITVSTJGSIHSPR	5 5 0 0 1
850	sp|Q9NRA1|PDGFC_HUMAN	55	IITVSTJGSIHSPR	5 5 1 0 1
851	sp|Q9NRA1|PDGFC_HUMAN	254	JFSVSIR	6 2 0 0 0
852	sp|Q9NRA1|PDGFC_HUMAN	254	JFSVSIR	8 2 0 0 0
853	sp|Q9NRA1|PDGFC_HUMAN	254	JFSVSIR	9 2 0 0 0
854	sp|Q9NS15|LTBP3_HUMAN	349	LJSTHCQDIJECAMPGVCR	4 5 1 0 1
855	sp|Q9NS15|LTBP3_HUMAN	349	LJSTHCQDIJECAMPGVCR	5 4 1 0 1
856	sp|Q9NX62|IMPA3_HUMAN	259	QVALQTFGJQTTIIPAGGAGYK	5 4 2 0 1
857	sp|Q9NY97|B3GN2_HUMAN	173	ESWGQESNAGJQTVVR	5 4 2 0 1
858	sp|Q9NY97|B3GN2_HUMAN	219	DTFFJLSLK	9 2 0 0 0
859	sp|Q9NZV1|CRIM1_HUMAN	746	JNSVPJYCK	5 4 2 0 1
860	sp|Q9UHN6|CEIP2_HUMAN	914	NJISLVK	5 2 0 0 0
861	sp|Q9ULF5|S39AA_HUMAN	139	HFHSHNHQHSHNHLNSEJQTVTSVSTK	5 4 1 0 1
862	sp|Q9ULF5|S39AA_HUMAN	139	HFHSHNHQHSHNHLNSEJQTVTSVSTK	5 4 2 0 1
863	sp|Q9ULF5|S39AA_HUMAN	339	DLNEDDHHHECLJVTQLLK	5 4 1 0 1
864	sp|Q9ULF5|S39AA_HUMAN	339	DLNEDDHHHECLJVTQLLK	5 4 2 0 1
865	sp|Q9UMF0|ICAM5_HUMAN	214	AELDLRPHGLGLFEJSSAPR	5 2 0 0 0
866	sp|Q9UMF0|ICAM5_HUMAN	214	AELDLRPHGLGLFEJSSAPR	6 2 0 0 0
867	sp|Q9UMF0|ICAM5_HUMAN	646	VLAPGIYVCJATNR	5 4 1 0 1
868	sp|Q9UNW1|MINP1_HUMAN	242	FLTEVEKJATALYHVEAFK	5 4 2 0 1
869	sp|Q9Y4K0|LOXL2_HUMAN	644	HYHSMEVFTHYDLLNLJGTK	4 5 0 0 1
870	sp|Q9Y4K0|LOXL2_HUMAN	644	HYHSMEVFTHYDLLNLJGTK	5 4 1 0 1
871	sp|Q9Y4K0|LOXL2_HUMAN	644	HYHSMEVFTHYDLLNLJGTK	5 4 2 0 1
872	sp|Q9Y4K0|LOXL2_HUMAN	644	HYHSMEVFTHYDLLNLJGTK	5 5 0 0 1
873	sp|Q9Y4L1|HYOU1_HUMAN	515	VFGSQJLTTVK	5 4 1 0 0
874	sp|Q9Y4L1|HYOU1_HUMAN	830	LSALDNLLJHSSMFLK	5 4 1 0 1
875	sp|Q9Y4L1|HYOU1_HUMAN	830	LSALDNLLJHSSMFLK	5 4 2 0 1
876	sp|Q9Y4L1|HYOU1_HUMAN	869	JATLAEQAK	5 2 0 0 0
[a] Peptide sequence with ‘J’ indicating the N-glycosylation site.
